1 **Patient-specific functional genomics and disease modeling suggest a**  
2 **role for LRP2 in Hypoplastic Left Heart Syndrome**

3 Xing Li, PhD\*; Almudena Martinez-Fernandez, PhD\*, Maria A. Missinato, PhD\*, Jeanne L.  
4 Theis, PhD\*, Georg Vogler, PhD\*, Tanja Nielsen, BS, Stanley M. Walls, PhD, Katja Birker, BS,  
5 Jared M. Evans, MS, Megan M. O'Byrne, MA, Zachary C. Fogarty, Karen Ocorr, PhD, André  
6 Terzic, MD, PhD, Rolf Bodmer<sup>#</sup>, PhD, Alexandre R. Colas<sup>#</sup>, PhD, Timothy J. Nelson, MD,  
7 PhD<sup>#</sup>, Timothy M. Olson, MD<sup>#</sup>

8 Development, Aging and Regeneration Program, Sanford-Burnham-Prebys Medical Discovery  
9 Institute, La Jolla, CA, USA (GV, MAM, PA, SS, KB, KO, ARC, RB), Department of  
10 Cardiovascular Medicine (AMF, AT, TMO), Cardiovascular Genetics Research Laboratory  
11 (JLT, TMO), Center for Regenerative Medicine (AT, TJN), Division of Biomedical Statistics  
12 and Informatics (XL, JME, MMO, ZCF), Division of Pediatric Cardiology, Department of  
13 Pediatric and Adolescent Medicine (TMO, TJN), Division of General Internal Medicine (TJN),  
14 Department of Molecular and Pharmacology and Experimental Therapeutics (AT, TMO, TJN),  
15 Mayo Clinic, Rochester, MN, USA.

16 \* **Equal contributions**, listed in alphabetical order: Xing Li, Almudena Martinez-Fernandez,  
17 Maria Missinato, Jeanne Theis, Georg Vogler

18 <sup>#</sup> **Corresponding authors**, listed in alphabetical order: Rolf Bodmer, Alexandre R. Colas,  
19 Timothy J. Nelson, Timothy M. Olson

20 **Total Word Count:** 3338

21 **Running title:** Functional genomics for congenital heart disease

## 1 **ABSTRACT**

2 Background: Congenital heart diseases, such as hypoplastic left heart syndrome (HLHS), are  
3 considered to have complex genetic underpinnings that are poorly understood. Here, an  
4 integrated multi-disciplinary approach was applied to identify novel genes and underlying  
5 mechanisms associated with HLHS.

6 Methods: A family-based strategy was employed that coupled whole genome with RNA  
7 sequencing of patient-derived induced pluripotent stem cells (iPSCs) from an HLHS proband-  
8 parent trio to identify, prioritize and functionally evaluate candidate genes in model systems.

9 Results: Consistent with the hypoplastic phenotype, the proband's iPSCs had reduced  
10 proliferation capacity. Mendelian inheritance modeling identified 10 genes with recessive rare  
11 variants and altered expression compared to the parents' iPSCs. siRNA/RNAi-mediated  
12 knockdown in generic human iPSC-derived cardiac progenitors and in the *in vivo Drosophila*  
13 heart model revealed that LDL receptor related protein *LRP2* and apolipoprotein *APOB* are  
14 required for robust hiPSC-derived cardiomyocyte proliferation and *Drosophila* heart function,  
15 respectively, possibly involving an oligogenic mechanism via growth-promoting WNT and SHH  
16 signaling. Burden analysis of rare damaging variants in the 2 genes and 80 interacting partners in  
17 a cohort of 130 HLHS probands and 861 controls identified significant enrichment in *LRP2*  
18 ( $p < 0.001$ ), a gene associated with poor clinical outcomes in 30% of cases.

19 Conclusions: Collectively, this cross-functional genetic approach to complex congenital heart  
20 disease revealed disruption of *LRP2* function as a novel genetic driver of HLHS, and hereby  
21 established a scalable approach to decipher the oligogenic underpinnings of maladaptive left  
22 heart development.

1 **Key Words:** lipoproteins, *Drosophila*, human iPSC, cardiogenesis, heart disease,  
2 cardiomyocytes.

3

4 **Abbreviations**

5 HLHS = hypoplastic left heart syndrome

6 CHD = congenital heart disease

7 WGS = whole genome sequencing

8 SHH = sonic hedgehog

9 WNT = wingless/integrated

## 1 INTRODUCTION

2 Hypoplastic left heart syndrome (HLHS) is a congenital heart disease (CHD)  
3 characterized by underdevelopment of the left ventricle, mitral and aortic valves, and aortic arch.  
4 Variable phenotypic manifestations and familial inheritance patterns, together with the numerous  
5 studies linking it to a diverse array of genes,<sup>1-4</sup> suggest that HLHS is genetically heterogeneous  
6 and may have significant environmental contributors. In this scenario, synergistic combinations  
7 of filtering and validation approaches are necessary to prioritize candidate genes and gene  
8 variants that may affect cardiogenic pathways throughout the dynamic process of human heart  
9 development.

10 Although the cellular mechanisms causing HLHS remain poorly characterized, a recent  
11 study reported generation of the first animal model of HLHS. Based on a digenic mechanism,  
12 mice deficient for HDAC-associated protein-encoding *Sap130* and protocadherin-coding *Pcdha9*  
13 exhibited left ventricular (LV) hypoplasia that was likely due – at least in part – to defective  
14 cardiomyocyte proliferation and differentiation, and increased cell death.<sup>5</sup> Similarly in humans,  
15 Gaber et al<sup>6</sup> provide evidence that HLHS-LV samples have more DNA damage and senescence  
16 with cell cycle arrest, and fewer cardiac progenitors and myocytes than controls. These  
17 observations suggest that impaired cardiomyocyte proliferation could be a mechanism  
18 contributing to HLHS pathogenesis, although pathogenic genes controlling this process in  
19 humans remain to be identified and validated. Therefore, new synergistic experimental  
20 approaches that functionally validate cellular mechanisms of defective cardiogenesis are needed  
21 to probe the oligogenic hypothesis of left-sided heart defects, such as HLHS.<sup>7,8</sup>

1 Over the last decade, induced pluripotent stem cells (iPSCs) have provided a  
2 revolutionary experimental tool to reveal aspects of the cellular manifestations associated with  
3 disease pathogenesis.<sup>9-11</sup> Progress in next-generation sequencing technology allows rapid whole  
4 genome DNA and RNA sequencing, thereby providing access to high-resolution and  
5 personalized genetic information. However, the interpretation of patient-specific sequence  
6 variants is often challenged by uncertainty in establishing a pathogenic link between biologically  
7 relevant variant(s) and a complex disease.<sup>12</sup>

8 Testing numerous potentially disease-causing genetic variants from patient sequence  
9 analysis in a mammalian *in vivo* model has been challenging because of high costs and low  
10 throughput. *Drosophila* with its genetic tools has emerged as the low cost, high throughput  
11 model of choice for human candidate disease gene testing, including neurological and cardiac  
12 diseases.<sup>13-15</sup> *Drosophila* has been established as an efficient model system to identify key genes  
13 and mechanisms critical for heart development and function that served as prototypes for  
14 mammalian studies, due to high degree of conservation of genetic pathways and reduced genetic  
15 complexity,<sup>16</sup> e.g the first cardiogenic transcription factor *Nkx2-5/tinman*<sup>17, 18</sup> that marked the  
16 beginning of a molecular-genetic understanding of cardiac specification.<sup>19-21</sup>

17 For this study, we combined whole-genome sequencing (WGS), iPSC technology and  
18 model system validation with a family-based approach to address potential HLHS disease  
19 mechanisms. We found that loss-of-function of 2 genes, *LRP2*, coding for a multi-ligand  
20 receptor, and *APOB*, a circulating lipoprotein ligand, resulted in reduced proliferation of hiPSCs  
21 and functional defects of the *Drosophila* heart. Furthermore, system-based analysis suggested  
22 underlying developmental (SHH and WNT) and growth-associated (TP53) pathways in HLHS.  
23 Finally, *LRP2* was enriched in variant burden analysis, suggesting a novel link between LRP2 in

1 cardiac development and the etiology of HLHS. Our integrated multidisciplinary high-  
2 throughput approach establishes a scalable and synergistic gene discovery platform in genetically  
3 complex human heart diseases.

## 4 **METHODS**

### 5 **Study subjects**

6 Written informed consent was obtained for the index family and an HLHS cohort, under  
7 a research protocol approved by the Mayo Clinic Institutional Review Board. Cardiac anatomy  
8 was assessed by echocardiography. Candidate genes were identified and prioritized by WGS of  
9 genomic DNA and RNA sequencing of patient-specific iPSC and cardiomyocytes. For variant  
10 burden analysis, controls were obtained from the Mayo Clinic Center for Individualized  
11 Medicine's Biobank. Methods for genomic analyses, RNA Sequencing, iPSC technology,  
12 bioinformatics and statistics are described in the Online Appendix. Data are available in NCBI  
13 SRA database (see below for SRA Accession IDs).

14

### 15 ***Drosophila* heart studies**

16 *Drosophila* orthologs were determined using the DIOPT database,<sup>22</sup> and RNAi lines  
17 were obtained from the Vienna Resource Drosophila Center (VDRC) stock center and crossed to  
18 Hand<sup>4.2</sup>-Gal4 (heart-specific driver) alone or in combination with one copy of the *tinman* loss-of-  
19 function allele *tin*<sup>EC40</sup>.<sup>18</sup> Fly hearts were filmed and analyzed according to standard protocols.<sup>13</sup>

20

21

## 1 **hiPSC-CM, siRNA transfection, EdU assay, Immunostaining, qRT-PCR**

2 hiPSC-derived cardiomyocytes were produced as previously described.<sup>23, 24</sup>  
3 Cardiomyocytes were plated in 384 wells and transfected with siRNAs (see Online Appendix).  
4 Two days after transfection, EdU was added to the media for 24 hours and fixed. EdU was  
5 detected using Click-it Plus EdU Imaging Kit (Life Technologies). For differentiation  
6 experiments, human cardiac mesoderm progenitors were fixed after 7days and stained with anti-  
7  $\alpha$ -Actinin, and anti-Transgelin antibodies. For qRT-PCR experiments, total RNA was extracted  
8 using TRIzol and chloroform. 1ug of RNA was converted in cDNA using QuantiTect Reverse  
9 Transcription kit (Qiagen). Human primer sequences for qRT-PCR were obtained from Harward  
10 Primer Bank. At least 3 independent biological replicates were performed for each experiment.

11

## 12 **Statistical analysis**

13 All statistical analysis for iPSC-derived cardiomyocytes were performed using GraphPad Prism  
14 version 7.0 (GraphPad Software, San Diego CA, USA). Statistical significance was analyzed by  
15 unpaired Student's *t*-test, and one-way ANOVA and shown as mean  $\pm$  SEM. P-values were  
16 considered significant when  $< 0.05$ .

17

## 18 **RESULTS**

### 19 **Transcriptome and cell cycle activity are altered in HLHS patient-derived iPSCs and CMs**

20 This study analyzed a family quintet comprised of unrelated parents and their three  
21 offspring (Figure 1A). The male proband (II.3) was diagnosed with non-syndromic HLHS by  
22 physical examination and echocardiography, which demonstrated aortic and mitral valve atresia,  
23 virtual absence of the left ventricular cavity, and severe aortic arch hypoplasia. He was born

1 prematurely at 29 weeks gestation and underwent staged surgical palliation at 2 and 11 months  
2 of age. Conversion to a fenestrated Fontan circulation at 3 years of age failed owing to systolic  
3 and diastolic heart failure, necessitating early take-down. The patient subsequently died of multi-  
4 organ system failure. Echocardiography revealed structurally and functionally normal hearts in  
5 the proband's mother (I.2), father (I.1) and siblings (II.1 and II.2). Maternal history is notable for  
6 4 miscarriages.

7 Patient-derived iPSCs are a valuable tool to investigate heart defects, such as those  
8 observed in HLHS.<sup>3,25</sup> In this study, iPSCs from the mother (I.2), father (I.1) and HLHS proband  
9 (II.3) were generated<sup>26</sup> to investigate differences in transcriptional profiles potentially associated  
10 with HLHS, cells from the proband-parent trio were differentiated to day 25, using a cardiogenic  
11 differentiation protocol and processed for subsequent RNA sequencing (Figure 1B). In this *in*  
12 *vitro* cellular context, bioinformatic analysis revealed that 5,104 differentially expressed  
13 transcripts (DETs) in D25 differentiated samples between proband vs. mother/father (Online  
14 Table 1, Benjamini-corrected  $p < 0.001$ ). We found that 1,401 DETs were concordantly  
15 differentially expressed between proband and both parents (Figure 1C, Online Figure 1A-C,  
16 Online Table 1 and 2). Consistent with previous observations in HLHS fetuses,<sup>6</sup> KEGG analysis  
17 revealed TP53 pathway enrichment (Figure 1D), including cell cycle inhibition (Figure 1E),  
18 suggesting that cell proliferation may be affected in proband cells.

19 To test this hypothesis, we measured cell cycle activity in proband and parent hiPSC-  
20 derived cardiomyocytes (hiPSC-CMs) using an EdU-incorporation assay (Figure 1F; see Online  
21 Figure 4 for fibroblasts). Indeed, proband hiPSC-CMs exhibited reduced number of EdU-  
22 positive cells (Figure 1G-I). To evaluate TP53-dependency of cell cycle defects, we performed  
23 siRNA-mediated TP53 or CDKN1A knockdown (KD) in hiPSC-CMs. We observed significantly



1 elevated EdU incorporation in proband and parents (Online Figure 1D-M). Collectively, our  
2 findings suggest HLHS may involve TP53 pathway-dependent blockade of CM proliferation,  
3 consistent with observations made in both HLHS fetuses<sup>6</sup> and a HLHS mouse model.<sup>5</sup>

#### 4 5 **Family-based WGS, variant filtering, and transcriptional profiling identified 10 candidates**

6 Array comparative genome hybridization ruled out a chromosomal deletion or  
7 duplication in the proband. WGS was performed to identify potentially pathogenic coding or  
8 regulatory single nucleotide variants (SNVs) or insertion/deletions (INDELs). Variants were  
9 filtered for rarity, predicted impact on protein structure or expression, and *de novo* or recessive  
10 inheritance, yielding 114 variants in 61 genes (Figure 2, Online Table 3). We next prioritized  
11 genes most likely to drive downstream pathways of dysregulated cardiogenesis in the HLHS  
12 proband by cross-referencing these candidate genes with 3,816 DETs identified in  
13 undifferentiated iPSC at day 0 (d0) (Online Table 4) and 5,104 DETs identified at day 25 (d25)  
14 differentiated cell lineages (Online Table 1). Ten genes harboring recessive variants were  
15 differentially expressed within the HLHS proband's iPSCs at d0 and d25: *HSPG2*, *APOB*, *LRP2*,  
16 *PRTG*, *SLC9A1*, *SDHD*, *JPT1*, *ELF4*, *HS6ST2* and *SIK1* (Figure 2).

#### 17 18 **Knockdown of candidate gene orthologs in *Drosophila* heart**

19 In order to determine whether these variants occurred within genes that could be important  
20 for cardiac differentiation *in vivo*, we took advantage of our established *Drosophila* heart  
21 development model and functional analysis tools (Figure 3A).<sup>14</sup> We hypothesized that genes  
22 critical for the *Drosophila* heart have conserved roles also in humans, as previously observed<sup>19</sup>,  
23 <sup>20, 27</sup>. Predicted by DIOPT database<sup>22</sup> to have orthologs in *Drosophila* (Figure 3B), we analyzed 9

1 genes using heart-specific RNAi KD. By *in vivo* heart structure and function analysis,<sup>13</sup> we found  
2 that KD of *LRP2* (*mgl*), and *APOB* (*apolpp*) resulted in arrhythmias (Figure 3C,D, E; Online  
3 movies S1, S2, S3). KD of *JPT1* (*CG1943*) resulted in dilation, suggesting a developmental or  
4 remodeling defect (Figure 3F).

5         Since HLHS is likely oligogenic,<sup>28, 29</sup> some genes in HLHS might only become apparent  
6 in combination with mutations in other cardiac-relevant genes. To test this, we examined the  
7 candidates also in the heterozygous background for *tinman/NKX2-5*, which in humans is well-  
8 known to contribute to a variety of CHD/HLHS manifestations.<sup>1, 25, 30, 31</sup> In this *in vivo* context,  
9 heart-specific knockdown of 2 out of 9 genes, namely HSPG2/Perlecan (*trol*), involved in  
10 extracellular matrix assembly,<sup>32</sup> and the SDHD (*SdhD*), exhibited a constricted phenotype  
11 (Figure 3G,H). These findings demonstrate that our bioinformatic candidate gene prioritization  
12 identified several candidates as cardiac relevant.

13

#### 14 **APOB and LRP2 regulate proliferation in human iPSC-derived cardiomyocytes**

15         Decreased proliferation of left ventricular cardiomyocytes is a phenotypic hallmark of  
16 HLHS;<sup>5, 6</sup> see Figure 1G), suggesting that cell cycle impairment likely contributes to the disease.  
17 Thus, we asked whether siRNA-mediated candidate gene KD affects hiPSC-CM proliferation  
18 (Figure 4A).<sup>23</sup> Indeed, siRNAs directed against all 10 candidate genes together caused a marked  
19 reduction of EdU+ cardiomyocytes (ACTN1+) and cardiac nuclei numbers (Figure 4B-E),  
20 concomitant with downregulation of cell cycle genes (Figure 4F). In addition, proliferation  
21 inhibitors (*TP53*) and apoptosis markers were increased (Figure 4G). Subsequently, KD of the  
22 individual candidates revealed that siAPOB and siLRP2 were each able to recapitulate the  
23 reduced hiPSC-CM proliferation and increased apoptosis phenotype (Figure 4H-M).

1           In order to determine the impact of *APOB* and *LRP2* during the process of cardiogenesis,  
2 both genes were simultaneously knocked down in 5 day old hiPSC-derived cardiac progenitors  
3 and cardiac differentiation was assessed at day 12 (Figure 4N). Lineage quantification was  
4 performed using *ACTN1* as a marker of cardiomyocytes, and *TAGLN* as a marker of fibroblasts.  
5 Notably, *APOB* and *LRP2* KD reduced cardiomyocyte numbers and differentiation and  
6 increased fibroblast density (Figure 4O-Y). Collectively, these data identify *APOB* and *LRP2* as  
7 major regulators of cell cycle, apoptosis, and cardiogenesis in hiPSC-CMs, potentially  
8 contributing to the developmental cardiac impairment in HLHS patients.

9

#### 10 **Potential regulatory network of validated gene candidates**

11           In order to delineate how potentially pathogenic mutations in the proband's six genes  
12 validated in model systems might affect signaling homeostasis in proband cells, we assembled a  
13 gene regulatory network containing *APOB*, *HS6ST2*, *HSPG2*, *JPT1*, *LRP2*, *SLC9A1* and their  
14 first neighbors (genetic and protein-protein interactions, using BioGRID data for *Drosophila*  
15 *melanogaster*) (Figure 5A; Online Table 5). Strikingly, the resulting network (82 genes; Online  
16 Figure 5) connected all 6 genes to WNT and SHH signaling cascades, both key regulators of  
17 cardiac differentiation and proliferation.<sup>33,34</sup> Consistent with these findings, RNA-seq analysis of  
18 the family trio cells revealed that negative regulator of SHH pathway, *PTCH1*, was upregulated,  
19 while agonists of WNT signaling pathway, *WNT1/3a/8a/10b* and *FZD10*,<sup>35</sup> were downregulated,  
20 suggesting these pathways are attenuated in the proband. In addition, *TP53* and *CDKN1A*  
21 expression was upregulated in response to siAPOB or siLRP2 (Figure 4), and notably also in  
22 proband cells (Figure 1). Importantly, siTP53/CDKN1A restored cell cycle activity in proband-

1 derived cardiomyocytes (Online Figure 1). Thus, a WNT/SHH/TP53-mediated impairment of  
2 cardiac differentiation and proliferation may contribute to HLHS in the proband (Figure 5A).

3

#### 4 **Rare variant analysis in HLHS cohort reveals enrichment in *LRP2***

5 To evaluate whether the proband's regulatory network of genes is generalizable to  
6 HLHS, we determined the frequency of rare, predicted-damaging variants in these genes in a  
7 cohort of 130 HLHS cases and 861 controls. Of the 82 genes, 65 had at least one rare variant  
8 present in cases or controls, yet *LRP2* was the only gene with significant enrichment in cases  
9 (Online Table 6). HLHS patients had a ~3-fold increase in the frequency of *LRP2* missense  
10 variants compared to healthy controls (10% versus 3.4%;  $p=0.0008$ ). Moreover, among the 13  
11 patients (including the index case) who carried a *LRP2* variant, 4 developed early heart failure  
12 (Figure 5B, Online Table 7). Comparison of *LRP2* variants identified in cases and controls did  
13 not reveal significant differences in their population-based frequencies, predicted-damaging  
14 scores, or presence in binding domains (data not shown). Of note, 13 of the 130 HLHS cases  
15 (including the index family proband) possessed <80% of ancestral Caucasian alleles, while all  
16 controls possessed  $\geq 80\%$ . Four of the 13 cases had rare, predicted-damaging missense variants in  
17 *LRP2* however all variants assessed were required to be rare in all racial populations. To  
18 eliminate the potentially confounding variable of race a Caucasian-only sub-analysis was  
19 performed, resulting in a less significant p-value for rare, predicted-damaging missense variants  
20 (7.7% versus 3.4%;  $p=0.05$ ). However, removal of the predicted-damaging restriction on rare  
21 *LRP2* variants among Caucasians revealed significant enrichment in cases ( $p=0.0035$ ), most  
22 notably in missense and intronic variants ( $p=0.0178$  and  $0.0082$ , respectively) Online Table 8).  
23 Location of variants within active histone marks or transcription factor binding sites was not

1 different between cases and controls. The biological significance of rare *LRP2* variants in HLHS  
2 and potential race-specific differences require further study.

3

#### 4 **DISCUSSION**

##### 5 **Integrated Multidisciplinary Disease Gene Discovery and Modeling**

6 Unraveling the molecular-genetic etiology of HLHS pathogenesis is crucial for (1) our  
7 ability to provide reliable prenatal diagnostics to families and (2) to develop novel approaches to  
8 to treat the disease. As an important step towards these goals, our integrated multidisciplinary  
9 approach identifies rare variants in *LRP2* as a molecular signature enriched in HLHS patients,  
10 consistent with our mechanistic analysis in model systems.

11 For this study, we used a powerful combination of high-throughput DNA/RNA patient  
12 sequencing coupled with high-throughput functional screening in model systems enabling to  
13 probe gene function (alone or in combination) on a wide array of cellular processes that are  
14 deployed during heart formation. For validation in model systems, we have established an  
15 integrated multi-site and multidisciplinary pipeline that systematically evaluates the functional  
16 role of genes presenting rare and deleterious variants in HLHS patients in hiPSC and *Drosophila*  
17 heart models. As a main objective – identify genes and potential mechanisms associated with  
18 HLHS - our pioneer study highlights rare, predicted-damaging *LRP2* missense variants as 3-fold  
19 enriched in 130 HLHS patients compared to 861 controls. Validation of this gene in hiPSC and  
20 *Drosophila* heart models demonstrates a requirement in cardiac proliferation, differentiation, and  
21 rhythm. Mutations in *LRP2* have been previously associated with cardiac defects in mouse<sup>36</sup> and  
22 in Donnai-Barrow Syndrome in humans.<sup>36, 37</sup> However, *LRP2* has not previously been linked to  
23 HLHS within curated bioinformatic networks.

1           One pre-requisite to reduce the knowledge gap between patient genomes and clinical  
2 phenotypes is to establish reliable/quantifiable phenotypic links between HLHS-associated genes  
3 and their role during normal cardiac development. Also, given that each large scale genomic  
4 study to identify CHD-associated genes can generate hundreds of candidates, we reasoned that  
5 our cardiac phenotypical platform should enable high throughput functional screening strategies  
6 to accommodate rapid testing of a large number of genes. Although overall heart structure in flies  
7 differs from that in vertebrates, the fundamental mechanisms of heart development and function  
8 are remarkably conserved, including a common transcriptional regulatory network,<sup>19, 20</sup> and a  
9 shared protein composition<sup>38</sup> as well as electrical and metabolic properties.<sup>14, 39, 40</sup> Using this  
10 ‘convergent biology’ approach identified APOB and LRP2 as hits in both the *in vitro* and *in vivo*  
11 cardiac model systems. Moreover, for further mechanistic understanding of complex CHD  
12 characterized by oligogenic etiologies this dual approach enables assessment of gene function  
13 combinatorially and in sensitized genetic backgrounds (e.g. *tinman/NKX2-5*).

14

## 15 **5H pathogenic pathway: a potential role for SHH, WNT, p53 and cell proliferation in** 16 **HLHS**

17           Our current understanding of the molecular genetic causes of HLHS is very limited,  
18 despite clear genetic origins of disease.<sup>41</sup> Past research on HLHS has yielded very few high-  
19 confidence gene candidates that may contribute to HLHS: *NOTCH1*, *NKX2-5* and *MYH6* have  
20 been implicated,<sup>1, 3, 4</sup> but they are also associated with other CHDs.

21           Heart development is a complex process that involves the interaction of many pathways  
22 and tissue interactions, and a large number of genes have been implicated in various types of  
23 CHDs.<sup>42</sup> The postulated oligogenic nature of HLHS likely is the result of an unfavorable

1 combination of disease genes, and such a combination of alleles in turn could affect several,  
2 successive steps of heart development. This makes it extremely difficult to model the disease by  
3 single gene mutations. Current hypotheses of the etiology of HLHS include changes in cell cycle  
4 progression of myocytes, as well as altered blood flow (“no flow – no grow”) as a consequence  
5 of defects of valves or the outflow tract.

6 Interestingly, the only mouse HLHS model to date, a digenic mutant for *sap130* and  
7 *pcdha9*,<sup>5</sup> has a penetrance of less than thirty percent, indicating a profound role for subtle  
8 differences between genetic backgrounds. This mouse model suggests a separate mechanism  
9 with *pcdha9* affecting aortic growth, whereas *sap130* can exert a more severe HLHS-like  
10 phenotype, which might reflect a modular etiology of HLHS that separates valve and ventricular  
11 defects.

12 The gene network analysis that we have conducted points to the possibility that several of  
13 the prioritized candidate genes identified in the index patient can have a modulatory impact on  
14 WNT and/or SHH via a diverse set of mechanisms.<sup>33</sup> There is evidence that the three of the  
15 candidates with fly heart phenotypes - *Trol/HSPG2*, *Mgl/LRP2* and *Apolpp/APOB* - can alter  
16 WNT and SHH signaling,<sup>43, 44</sup> consistent with both pathways being attenuated in the proband  
17 iPSCs. We hypothesize that a collective of likely hypomorphic mutations affects heart  
18 development leading to HLHS. Impaired ventricular growth could in addition be caused by  
19 changes in the p53 pathway, and our analysis of iPSC-derived cardiomyocytes suggests that p53  
20 indeed depends on APOB and LRP2 levels. Such a multi-hit model of HLHS caused by sub-  
21 threshold hypomorphic alleles represents an attractive explanation of the disease.

1           In summary, this integrated multidisciplinary strategy of functional genomics using  
2 patient-specific iPSC combined with *in vivo* and human cellular model systems of functional  
3 validation postulates novel genetic pathways and potential polygenic interactions underlying  
4 HLHS. These complementary experimental approaches enabled the deconvolution of the  
5 complex polygenic risk factors underlying HLHS genotype/phenotype and establish the novel  
6 groundwork for definitive mechanistic studies of interacting risk factors that contribute to  
7 arrested cardiac development and adverse outcomes. This scalable approach promises more  
8 efficient discovery of novel genes associated more broadly with HLHS as multiple HLHS  
9 families can now be multiplexed in future studies.

10

## 11 **Study Limitations**

12           HLHS candidate gene selection was based on *in silico* predictive algorithms to filter for  
13 functional coding and regulatory variants. Mendelian inheritance modeling, a strategy used to  
14 identify major-effect variants, did not include consideration of incompletely penetrant  
15 heterozygous alleles inherited from an unaffected parent. Differential gene expression, which  
16 was functionally validated as a powerful filter for candidate variant prioritization, excluded  
17 functional variants that do not alter gene expression. Not all human genes are conserved in  
18 *Drosophila*, but >70% of disease-causing human genes have a fly ortholog. While structural  
19 differences exist between hiPSC-CM, *Drosophila* heart and human newborn cardiomyocytes, our  
20 combinatorial approach allows to uncover gene networks and interactions that is not feasible in  
21 mammalian model systems.

22



1 **Data availability**

2 Sequencing data are deposited in the NCBI Sequence Read Archive (SRA) database with  
3 accession numbers: SRS1417684 (proband iPSCs), SRS1417685 (Dad iPSCs), SRS1417686  
4 (Mom iPSCs), SRS1417695 (proband d25 differentiated cells), SRS1417696 (Dad d25  
5 differentiated cells), SRS1417714 (Mom d25 differentiated cells).

6  
7 **Acknowledgements:** The authors acknowledge support from the Todd and Karen Wanek Family  
8 Program for Hypoplastic Left Heart Syndrome and the Medical Genome Facility Sequencing  
9 Core and Biobank within the Mayo Clinic Center for Individualized Medicine, Rochester, MN.  
10 We gratefully acknowledge the patient and family who participated in this study. We thank Sean  
11 Spearing, Prashila Amatya, Marco Tamayo and Bosco Trinh for their excellent technical  
12 assistance.

13  
14 **Sources of Funding:** This work was supported by the Todd and Karen Wanek Family Program  
15 for Hypoplastic Left Heart Syndrome, Mayo Clinic Foundation, Rochester, MN (SAN-233970 to  
16 R.B. and A.R.C). This work was also supported by National Institutes of Health (R01-HL054732  
17 to RB).

18  
19 **Disclosures:** None.

20  
21 **Affiliations:** T.J.N and T.M.O: Pediatric Cardiology, Mayo Clinic, 200 First Street SW,  
22 Rochester, MN 55905, USA. Phone: 507-538-4891, Fax 507-284-8432, Email:  
23 [Nelson.Timothy@Mayo.edu](mailto:Nelson.Timothy@Mayo.edu)

1 R.B. and A.R.C.: Development, Aging and Regeneration Program, Sanford-Burnham-Prebys  
2 Medical Discovery Institute, 10901 North Torrey Pines Road, La Jolla, CA92037, USA. Phone:  
3 858-795-5295. Email: [rolf@SBPdiscovery.org](mailto:rolf@SBPdiscovery.org).

4

## 1 REFERENCES

- 2
- 3 1. Elliott DA, Kirk EP, Yeoh T, Chandar S, McKenzie F, Taylor P, Grossfeld P, Fatkin D, Jones O,  
4 Hayes P, Feneley M and Harvey RP. Cardiac homeobox gene NKX2-5 mutations and congenital heart  
5 disease: associations with atrial septal defect and hypoplastic left heart syndrome. *J Am Coll Cardiol.*  
6 2003;41:2072-2076.
- 7 2. Lascone M, Ciccone R, Galletti L, Marchetti D, Seddio F, Lincesso AR, Pezzoli L, Vetro A,  
8 Barachetti D, Boni L, Federici D, Soto AM, Comas JV, Ferrazzi P and Zuffardi O. Identification of de  
9 novo mutations and rare variants in hypoplastic left heart syndrome. *Clin Genet.* 2012;81:542-554.
- 10 3. Theis JL, Hrstka SC, Evans JM, O'Byrne MM, de Andrade M, O'Leary PW, Nelson TJ and Olson  
11 TM. Compound heterozygous NOTCH1 mutations underlie impaired cardiogenesis in a patient with  
12 hypoplastic left heart syndrome. *Hum Genet.* 2015;134:1003-1011.
- 13 4. Theis JL, Zimmermann MT, Evans JM, Eckloff BW, Wieben ED, Qureshi MY, O'Leary PW and  
14 Olson TM. Recessive MYH6 mutations in hypoplastic left heart with reduced ejection fraction. *Circ*  
15 *Cardiovasc Genet.* 2015;8:564-571.
- 16 5. Liu X, Yagi H, Saeed S, Bais AS, Gabriel GC, Chen Z, Peterson KA, Li Y, Schwartz MC,  
17 Reynolds WT, Saydmohammed M, Gibbs B, Wu Y, Devine W, Chatterjee B, Klena NT, Kostka D, de  
18 Mesy Bentley KL, Ganapathiraju MK, Dexheimer P, Leatherbury L, Khalifa O, Bhagat A, Zahid M, Pu  
19 W, Watkins S, Grossfeld P, Murray SA, Porter Jr GA, Tsang M, Martin LJ, Benson DW, Aronow BJ and  
20 Lo CW. The complex genetics of hypoplastic left heart syndrome. *Nat Genet.* 2017;49:1152.
- 21 6. Gaber N, Gagliardi M, Patel P, Kinnear C, Zhang C, Chitayat D, Shannon P, Jaeggi E, Tabori U,  
22 Keller G and Mital S. Fetal reprogramming and senescence in hypoplastic left heart syndrome and in  
23 human pluripotent stem cells during cardiac differentiation. *Am J Pathol.* 2013;183:720-734.

- 1 7. Hinton RB, Martin LJ, Tabangin ME, Mazwi ML, Cripe LH and Benson DW. Hypoplastic Left  
2 Heart Syndrome is heritable. *J Am Coll Cardiol*. 2007;50:1590-1595.
- 3 8. McBride KL, Marengo L, Canfield M, Langlois P, Fixler D and Belmont JW. Epidemiology of  
4 noncomplex left ventricular outflow tract obstruction malformations (aortic valve stenosis, coarctation of  
5 the aorta, hypoplastic left heart syndrome) in Texas, 1999–2001. *Birth Defects Research Part A: Clinical  
6 and Molecular Teratology*. 2005;73:555-561.
- 7 9. Matsa E, Ahrens JH and Wu JC. Human induced pluripotent stem cells as a platform for  
8 personalized and precision cardiovascular medicine. *Physiol Rev*. 2016;96:1093-1126.
- 9 10. Mercola M, Colas A and Willems E. Induced pluripotent stem cells in cardiovascular drug  
10 discovery. *Circ Res*. 2013;112:534-548.
- 11 11. Moretti A, Laugwitz K-L, Dorn T, Sinnecker D and Mummery C. Pluripotent stem cell models of  
12 human heart disease. *Cold Spring Harb Perspect Med*. 2013;3.
- 13 12. Cooper GM and Shendure J. Needles in stacks of needles: finding disease-causal variants in a  
14 wealth of genomic data. *Nat Rev Genet*. 2011;12:628-640.
- 15 13. Fink M, Callol-Massot C, Chu A, Ruiz-Lozano P, Izpisua Belmonte JC, Giles W, Bodmer R and  
16 Ocorr K. A new method for detection and quantification of heartbeat parameters in *Drosophila*, zebrafish,  
17 and embryonic mouse hearts. *Biotechniques*. 2009;46:101-113.
- 18 14. Ocorr K, Vogler G and Bodmer R. Methods to assess *Drosophila* heart development, function and  
19 aging. *Methods*. 2014;68:265-272.
- 20 15. Şentürk M and Bellen HJ. Genetic strategies to tackle neurological diseases in fruit flies. *Current  
21 Opinion in Neurobiology*. 2018;50:24-32.

- 1 16. Bodmer R and Frasch M. *Development and aging of the Drosophila heart*. Amsterdam: Elsevier;  
2 2010.
- 3 17. Azpiazu N and Frasch M. Tinman and bagpipe: two homeo box genes that determine cell fates in  
4 the dorsal mesoderm of Drosophila. *Genes Dev*. 1993;7:1325-1340.
- 5 18. Bodmer R. The gene tinman is required for specification of the heart and visceral muscles in  
6 Drosophila. *Development*. 1993;118:719-729.
- 7 19. Bodmer R. Heart development in Drosophila and its relationship to vertebrates. *Trends*  
8 *Cardiovasc Med*. 1995;5:21-28.
- 9 20. Cripps RM and Olson EN. Control of cardiac development by an evolutionarily conserved  
10 transcriptional network. *Dev Biol*. 2002;246:14-28.
- 11 21. Benson DW, Silberbach GM, Kavanaugh-McHugh A, Cottrill C, Zhang Y, Riggs S, Smalls O,  
12 Johnson MC, Watson MS, Seidman JG, Seidman CE, Plowden J and Kugler JD. Mutations in the cardiac  
13 transcription factor NKX2.5 affect diverse cardiac developmental pathways. *J Clin Invest*.  
14 1999;104:1567-1573.
- 15 22. Hu Y, Flockhart I, Vinayagam A, Bergwitz C, Berger B, Perrimon N and Mohr SE. An  
16 integrative approach to ortholog prediction for disease-focused and other functional studies. *BMC*  
17 *Bioinformatics*. 2011;12:357.
- 18 23. Cunningham TJ, Yu MS, McKeithan WL, Spiering S, Carrette F, Huang C-T, Bushway PJ,  
19 Tierney M, Albini S, Giacca M, Mano M, Puri PL, Sacco A, Ruiz-Lozano P, Riou J-F, Umbhauer M,  
20 Duester G, Mercola M and Colas AR. Id genes are essential for early heart formation. *Genes Dev*.  
21 2017;31:1325-1338.

- 1 24. Yu MS, Spiering S and Colas AR. Generation of first heart field-like cardiac progenitors and  
2 ventricular-like cardiomyocytes from human pluripotent stem cells. *J Vis Exp*. 2018:e57688.
- 3 25. Hrstka SCL, Li X, Nelson TJ and Wanek Program Genetics Pipeline G. NOTCH1-dependent  
4 nitric oxide signaling deficiency in Hypoplastic Left Heart Syndrome revealed through patient-specific  
5 phenotypes detected in bioengineered cardiogenesis. *Stem Cells*. 2017;35:1106-1119.
- 6 26. Takahashi K and Yamanaka S. Induction of pluripotent stem cells from mouse embryonic and  
7 adult fibroblast cultures by defined factors. *Cell*. 2006;126:663-676.
- 8 27. Qian L, Wythe JD, Liu J, Cartry J, Vogler G, Mohapatra B, Otway RT, Huang Y, King IN,  
9 Maillet M, Zheng Y, Crawley T, Taghli-Lamallem O, Semsarian C, Dunwoodie S, Winlaw D, Harvey  
10 RP, Fatkin D, Towbin JA, Molkenin JD, Srivastava D, Ocorr K, Bruneau BG and Bodmer R.  
11 Tinman/Nkx2-5 acts via miR-1 and upstream of Cdc42 to regulate heart function across species. *J Cell*  
12 *Biol*. 2011;193:1181-1196.
- 13 28. Blue GM, Kirk EP, Giannoulatou E, Sholler GF, Dunwoodie SL, Harvey RP and Winlaw DS.  
14 Advances in the genetics of congenital heart disease: A clinician's guide. *J Am Coll Cardiol*.  
15 2017;69:859-870.
- 16 29. Gelb BD and Chung WK. Complex genetics and the etiology of human congenital heart disease.  
17 *Cold Spring Harb Perspect Med*. 2014;4.
- 18 30. Benson DW. Genetic origins of pediatric heart disease. *Pediatr Cardiol*. 2010;31:422-429.
- 19 31. Kobayashi J, Yoshida M, Tarui S, Hirata M, Nagai Y, Kasahara S, Naruse K, Ito H, Sano S and  
20 Oh H. Directed differentiation of patient-specific induced pluripotent stem cells identifies the  
21 transcriptional repression and epigenetic modification of NKX2-5, HAND1, and NOTCH1 in Hypoplastic  
22 Left Heart Syndrome. *PLoS One*. 2014;9:e102796.

- 1 32. Sasse P, Malan D, Fleischmann M, Roell W, Gustafsson E, Bostani T, Fan Y, Kolbe T, Breitbach  
2 M, Addicks K, Welz A, Brem G, Hescheler J, Aszodi A, Costell M, Bloch W and Fleischmann BK.  
3 Perlecan is critical for heart stability. *Cardiovasc Res.* 2008;80:435-444.
- 4 33. Briggs LE, Burns TA, Lockhart MM, Phelps AL, Van den Hoff MJB and Wessels A. Wnt/ $\beta$ -  
5 catenin and sonic hedgehog pathways interact in the regulation of the development of the dorsal  
6 mesenchymal protrusion. *Dev Dyn.* 2016;245:103-113.
- 7 34. Gessert S and Kühl M. The multiple phases and faces of Wnt signaling during cardiac  
8 differentiation and development. *Circ Res.* 2010;107:186-199.
- 9 35. Dawson K, Aflaki M and Nattel S. Role of the Wnt-Frizzled system in cardiac pathophysiology: a  
10 rapidly developing, poorly understood area with enormous potential. *J Physiol.* 2013;591:1409-1432.
- 11 36. Baardman ME, Zwier MV, Wisse LJ, Gittenberger-de Groot AC, Kerstjens-Frederikse WS,  
12 Hofstra RM, Jurdzinski A, Hierck BP, Jongbloed MR, Berger RM, Plosch T and DeRuiter MC. Common  
13 arterial trunk and ventricular non-compaction in Lrp2 knockout mice indicate a crucial role of LRP2 in  
14 cardiac development. *Dis Model Mech.* 2016;9:413-425.
- 15 37. Kantarci S, Ragge NK, Thomas NS, Robinson DO, Noonan KM, Russell MK, Donnai D,  
16 Raymond FL, Walsh CA, Donahoe PK and Pober BR. Donnai-Barrow syndrome (DBS/FOAR) in a child  
17 with a homozygous LRP2 mutation due to complete chromosome 2 paternal isodisomy. *Am J Med Genet*  
18 *A.* 2008;146A:1842-1847.
- 19 38. Cammarato A, Ahrens CH, Alayari NN, Qeli E, Rucker J, Reedy MC, Zmasek CM, Gucek M,  
20 Cole RN, Van Eyk JE, Bodmer R, O'Rourke B, Bernstein SI and Foster DB. A mighty small heart: the  
21 cardiac proteome of adult *Drosophila melanogaster*. *PLoS One.* 2011;6:e18497.

- 1 39. Ocorr K, Reeves NL, Wessells RJ, Fink M, Chen HS, Akasaka T, Yasuda S, Metzger JM, Giles  
2 W, Posakony JW and Bodmer R. KCNQ potassium channel mutations cause cardiac arrhythmias in  
3 *Drosophila* that mimic the effects of aging. *Proc Natl Acad Sci U S A*. 2007;104:3943-8.
- 4 40. Diop SB and Bodmer R. Gaining insights into diabetic cardiomyopathy from *Drosophila*. *Trends*  
5 *Endocrinol Metab*. 2015;26:618-627.
- 6 41. Yagi H, Liu X, Gabriel GC, Wu Y, Peterson K, Murray SA, Aronow BJ, Martin LJ, Benson DW  
7 and Lo CW. The genetic landscape of Hypoplastic Left Heart Syndrome. *Pediatr Cardiol*. 2018;39:1069-  
8 1081.
- 9 42. Pierpont Mary E, Brueckner M, Chung Wendy K, Garg V, Lacro Ronald V, McGuire Amy L,  
10 Mital S, Priest James R, Pu William T, Roberts A, Ware Stephanie M, Gelb Bruce D, Russell Mark W  
11 and null n. Genetic basis for congenital heart disease: Revisited: A scientific statement from the American  
12 Heart Association. *Circulation*. 2018;138:e653-e711.
- 13 43. Christ A, Christa A, Klippert J, Eule JC, Bachmann S, Wallace Valerie A, Hammes A and  
14 Willnow Thomas E. LRP2 acts as SHH clearance receptor to protect the retinal margin from mitogenic  
15 stimuli. *Dev Cell*. 2015;35:36-48.
- 16 44. Datta MW, Hernandez AM, Schlicht MJ, Kahler AJ, DeGueme AM, Dhir R, Shah RB, Farach-  
17 Carson C, Barrett A and Datta S. Perlecan, a candidate gene for the CAPB locus, regulates prostate cancer  
18 cell growth via the Sonic Hedgehog pathway. *Molecular Cancer*. 2006;5:9.

19

20



1 **Figure Legend 1. Family-based iPSC characterization for HLHS.** (A) Pedigree of family 5H:  
2 proband with HLHS (black symbol), relatives without CHD (white symbols), miscarriages (gray  
3 diamonds). (B) Schematic for family-based iPSC production and characterization. (C) Whole  
4 genome RNA sequencing identifies 1401 concordantly DETs between proband and parents. (D)  
5 KEGG pathway analysis shows enrichment of DETs in TP53 pathway. (E) Heatmap of p53  
6 signaling pathway associated genes in probands vs parents. (F) Schematic describing EdU  
7 incorporation assay in hiPSC-CMs. (G) Graph representing quantification of EdU+  
8 cardiomyocytes in HLHS family-derived iPSC-CMs. \*\*\* $p < 0.001$  One-way ANOVA. (H,I)  
9 Representative images of iPSC-CMs derived from mother (H) and proband (I), stained for EdU,  
10 ACTN1 and DAPI. Scale bar: 50  $\mu\text{m}$ .

11

1 **Figure Legend 2. Identification of HLHS candidate genes from whole genome and RNA**  
2 **sequencing.** An iterative, family-based variant filtering approach based on rarity, functional  
3 impact, and mode of inheritance yielded 61 candidate genes. RNA sequencing data from d0 iPSC  
4 and d25 differentiated iPSC were used to filter for transcriptional differences yielding 10  
5 candidate genes.

6

7

1 **Figure Legend 3. Phenotypic assessment of HLHS candidate genes in *Drosophila* adult**  
2 **hearts. (a)** Schematic of the *Drosophila* adult heart assay. **(b)** Human candidate genes and  
3 corresponding *Drosophila* ortholog as determined by DIOPT score (\*confidence score: number  
4 of databases reporting orthology). Listed are heart phenotypes upon knockdown in wildtype or  
5 *NKX2-5/tin<sup>+/-</sup>* heterozygous background. **(c-e)** RNAi-induced arrhythmicity and M-modes  
6 observed with *APOB* and *LRP2* knockdown. **(f-h)** Heart size (EDD: enddiastolic diameter)  
7 alterations upon RNAi-knockdown of *JPT1*, *HSPG2* and *SDHD* (also in *NKX2-5/tin*  
8 heterozygous background). Wilcoxon rank sum test: \*p<0.05, \*\*p<0.01, \*\*\*p<0.001.

9

10

1 **Figure Legend 4. HLHS candidate gene analysis in hiPSC-derived cardiomyocytes and**  
2 **progenitors**

3 (A) Schematic of the experimental strategy. (B,C) Quantification of EdU incorporation and  
4 number of cardiac nuclei in day 28 hiPSC-CMs. (D,E) Representative picture of ACTN1, DAPI  
5 and EdU staining of hiPSC-CM transfected with siRNA directed against the ten candidate genes  
6 (si5H). (F) qRT-PCR analysis after si5H transfection. CCNE1: cyclin E1; PCNA: proliferating  
7 cell nuclear antigen; CCNB1: cyclin B1; CCNB2: cyclin B2; CDK1: cyclin-dependent kinase 1.  
8 (G) qRT-PCR analysis of cell death markers genes in si5H hiPSC-CM. CRADD: death domain  
9 receptor; TP53: tumor protein p53; CASP6: Caspase 6. (H) Deconvolution of “5H” genes in EdU  
10 incorporation with hiPSC-CMs. One-way ANOVA: \*\* $p < 0.01$ . (I-K) Representative ACTN1 and  
11 EdU staining upon siAPOB and siLRP2 transfection. (L,M) qRT-PCR analysis of cell cycle,  
12 tumor suppressor and cell cycle inhibitor genes upon siAPOB/siLRP2 transfection. (N)  
13 Schematic of differentiation potential of cardiac mesoderm progenitors. (O-Q) Quantification of  
14 ACTN1 (cardiomyocytes), TAGLN (fibroblasts) and DAPI (nuclei). (R-Y) Representative  
15 images of day12 human cardiac mesoderm progenitors after siAPOB, siLRP2 and siControl  
16 transfection, immunostained for DAPI, ACTN1 and TAGLN. All experiments were in biological  
17 triplicates. Scale bar: 50 $\mu$ m. Student’s T-test (except H): \* $p < 0.05$ , \*\* $p < 0.01$ ,  
18 \*\*\* $p < 0.001$ , \*\*\*\* $p < 0.0001$ .

19

1 **Figure Legend 5. Potential role for SHH, WNT and LRP2 in HLHS.** (a) A gene network  
2 integrating family-centric HLHS candidate genes with heart development. ORANGE – genes  
3 with cardiac phenotypes in iPSC/*Drosophila* assays. YELLOW – other candidate genes tested.  
4 RED – Genes up-regulated in proband iPSCs vs. parents. BLUE – Genes downregulated down-  
5 regulated in proband iPSCs vs. parents. (b) Cohort-wide analysis of LRP2 variants shows  
6 significant enrichment for SNVs in HLHS patients compared to control populations. Variants  
7 (blue / magenta) are found throughout LRP2 protein.

8

# Figure 1

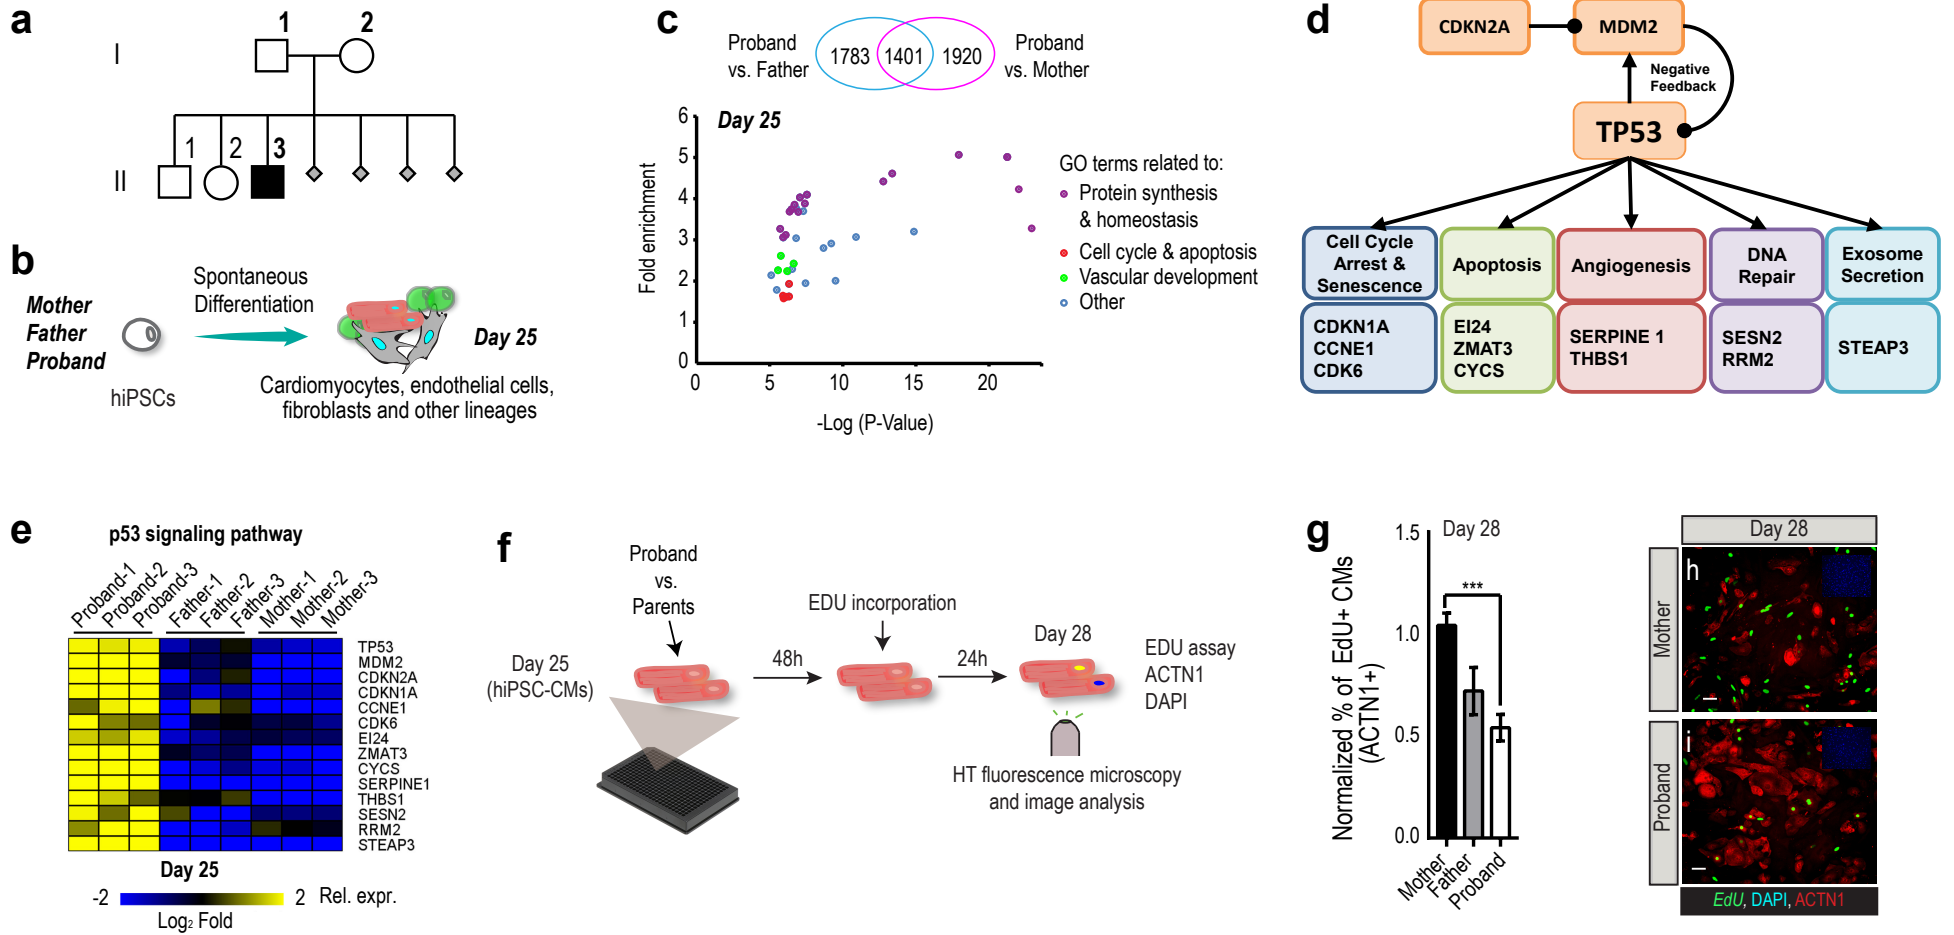

## Figure 2

### Whole Genome DNA Sequencing

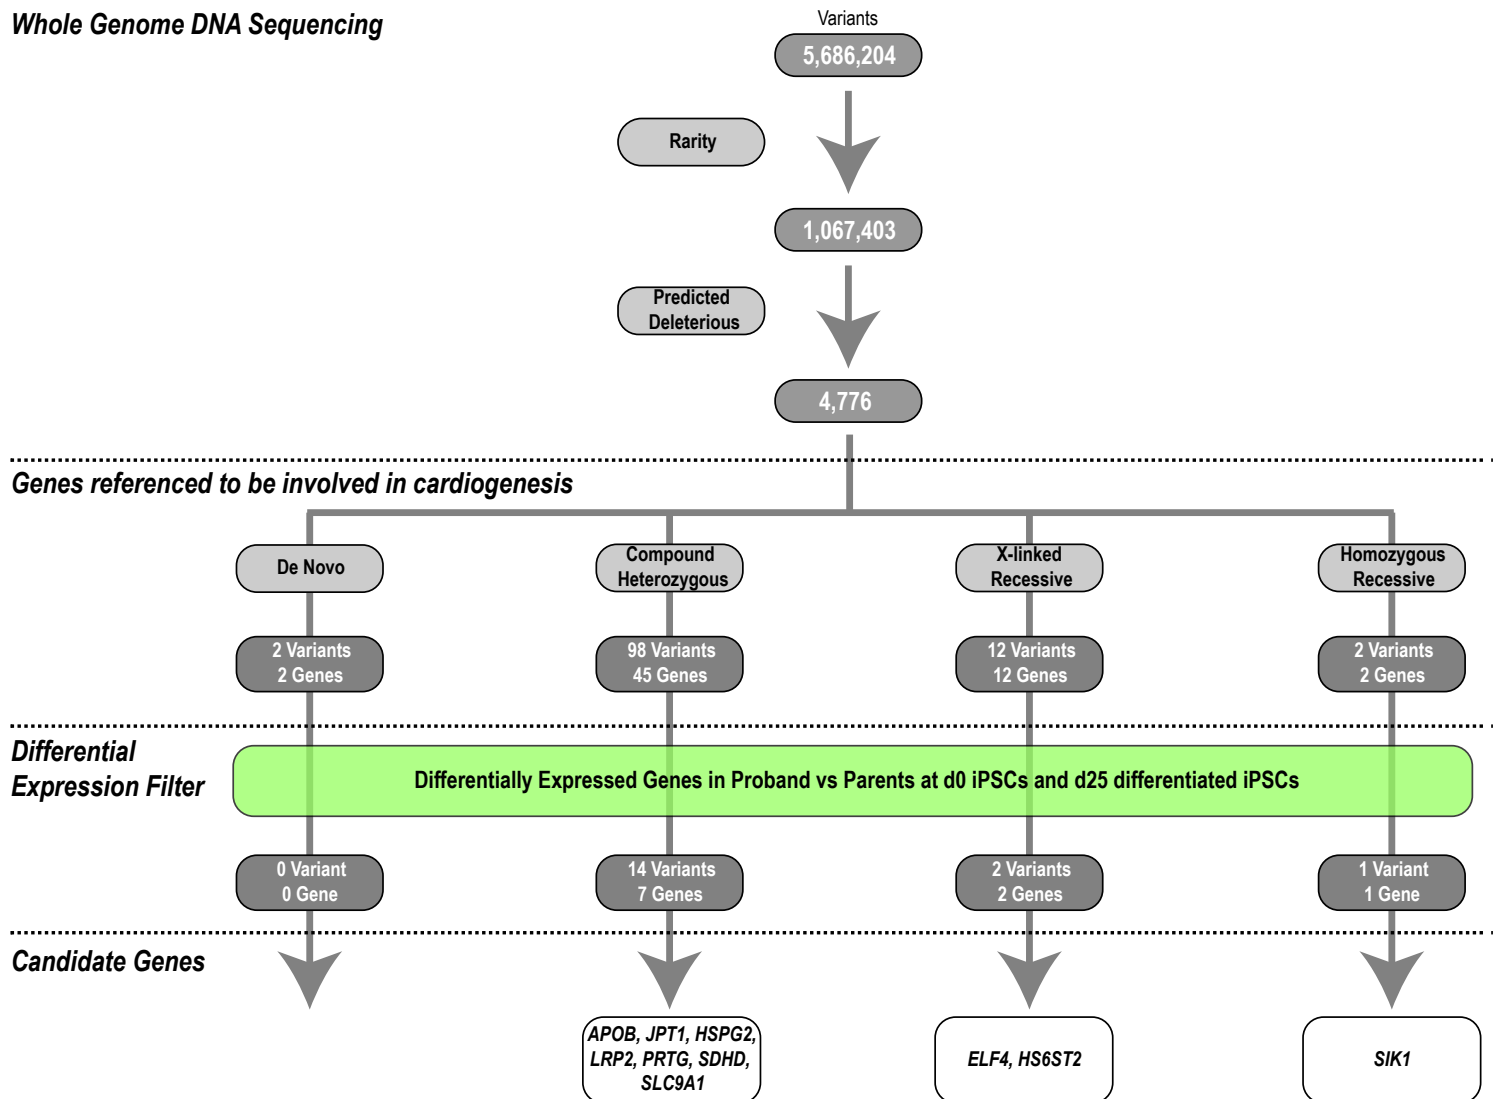

## Figure 3

**a**

Loss of function strategy:  
Heart-specific (*Hand4.2 driver*) RNAi  
of 5H genes in post-mitotic CMs

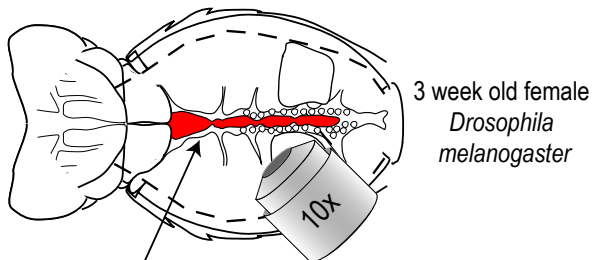

Kinetic imaging (30s@140fps) followed by automated and quantitative assessment of heart size and function

**b**

| human gene    | DIOPT* score | fly gene       | heart phenotypes | NKX2-5 / tin interaction phenotype |
|---------------|--------------|----------------|------------------|------------------------------------|
| <i>HSPG2</i>  | 9            | <i>trol</i>    | -/-              | constriction                       |
| <i>APOB</i>   | 6            | <i>apolpp</i>  | arrhythmic       | -/-                                |
| <i>LRP2</i>   | 11           | <i>mgl</i>     | arrhythmic       | -/-                                |
| <i>SLC9A1</i> | 5            | <i>Nhe2</i>    | -/-              | -/-                                |
| <i>SDHD</i>   | 12           | <i>SdhD</i>    | -/-              | constriction                       |
| <i>JPT1</i>   | 3            | <i>Jupiter</i> | -/-              | -/-                                |
| <i>JPT1</i>   | 2            | <i>CG1943</i>  | dilation         | -/-                                |
| <i>ELF4</i>   | 5            | <i>Eip74EF</i> | -/-              | -/-                                |
| <i>HS6ST2</i> | 9            | <i>Hs6st</i>   | -/-              | -/-                                |
| <i>SIK1</i>   | 3            | <i>Sik2</i>    | -/-              | -/-                                |

Wilcoxon rank sum test,  $p < 0.05$

**c**

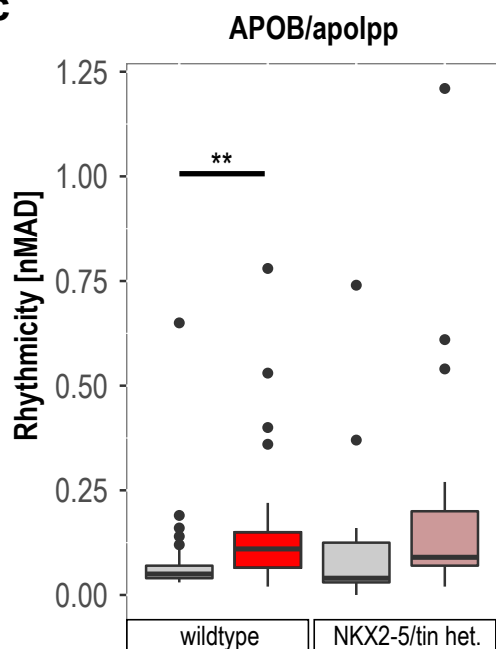

**d**

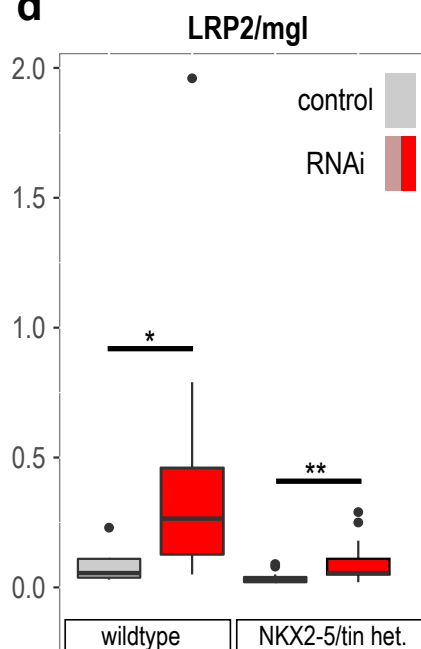

**e**

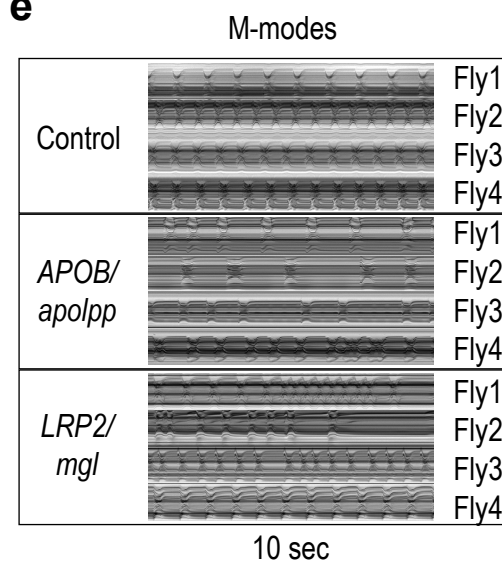

**f**

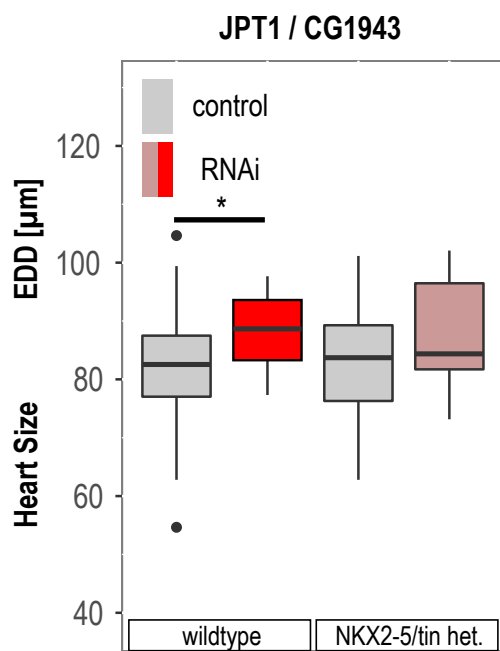

**g**

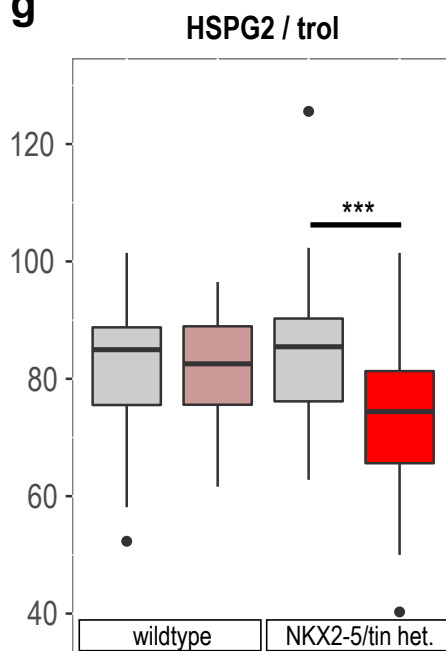

**h**

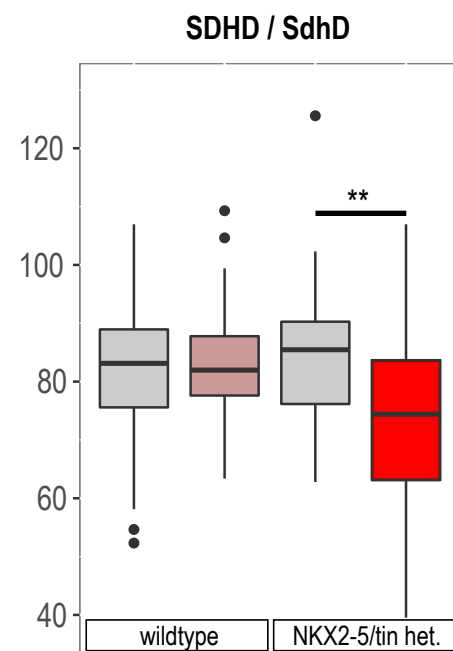



# Figure 4

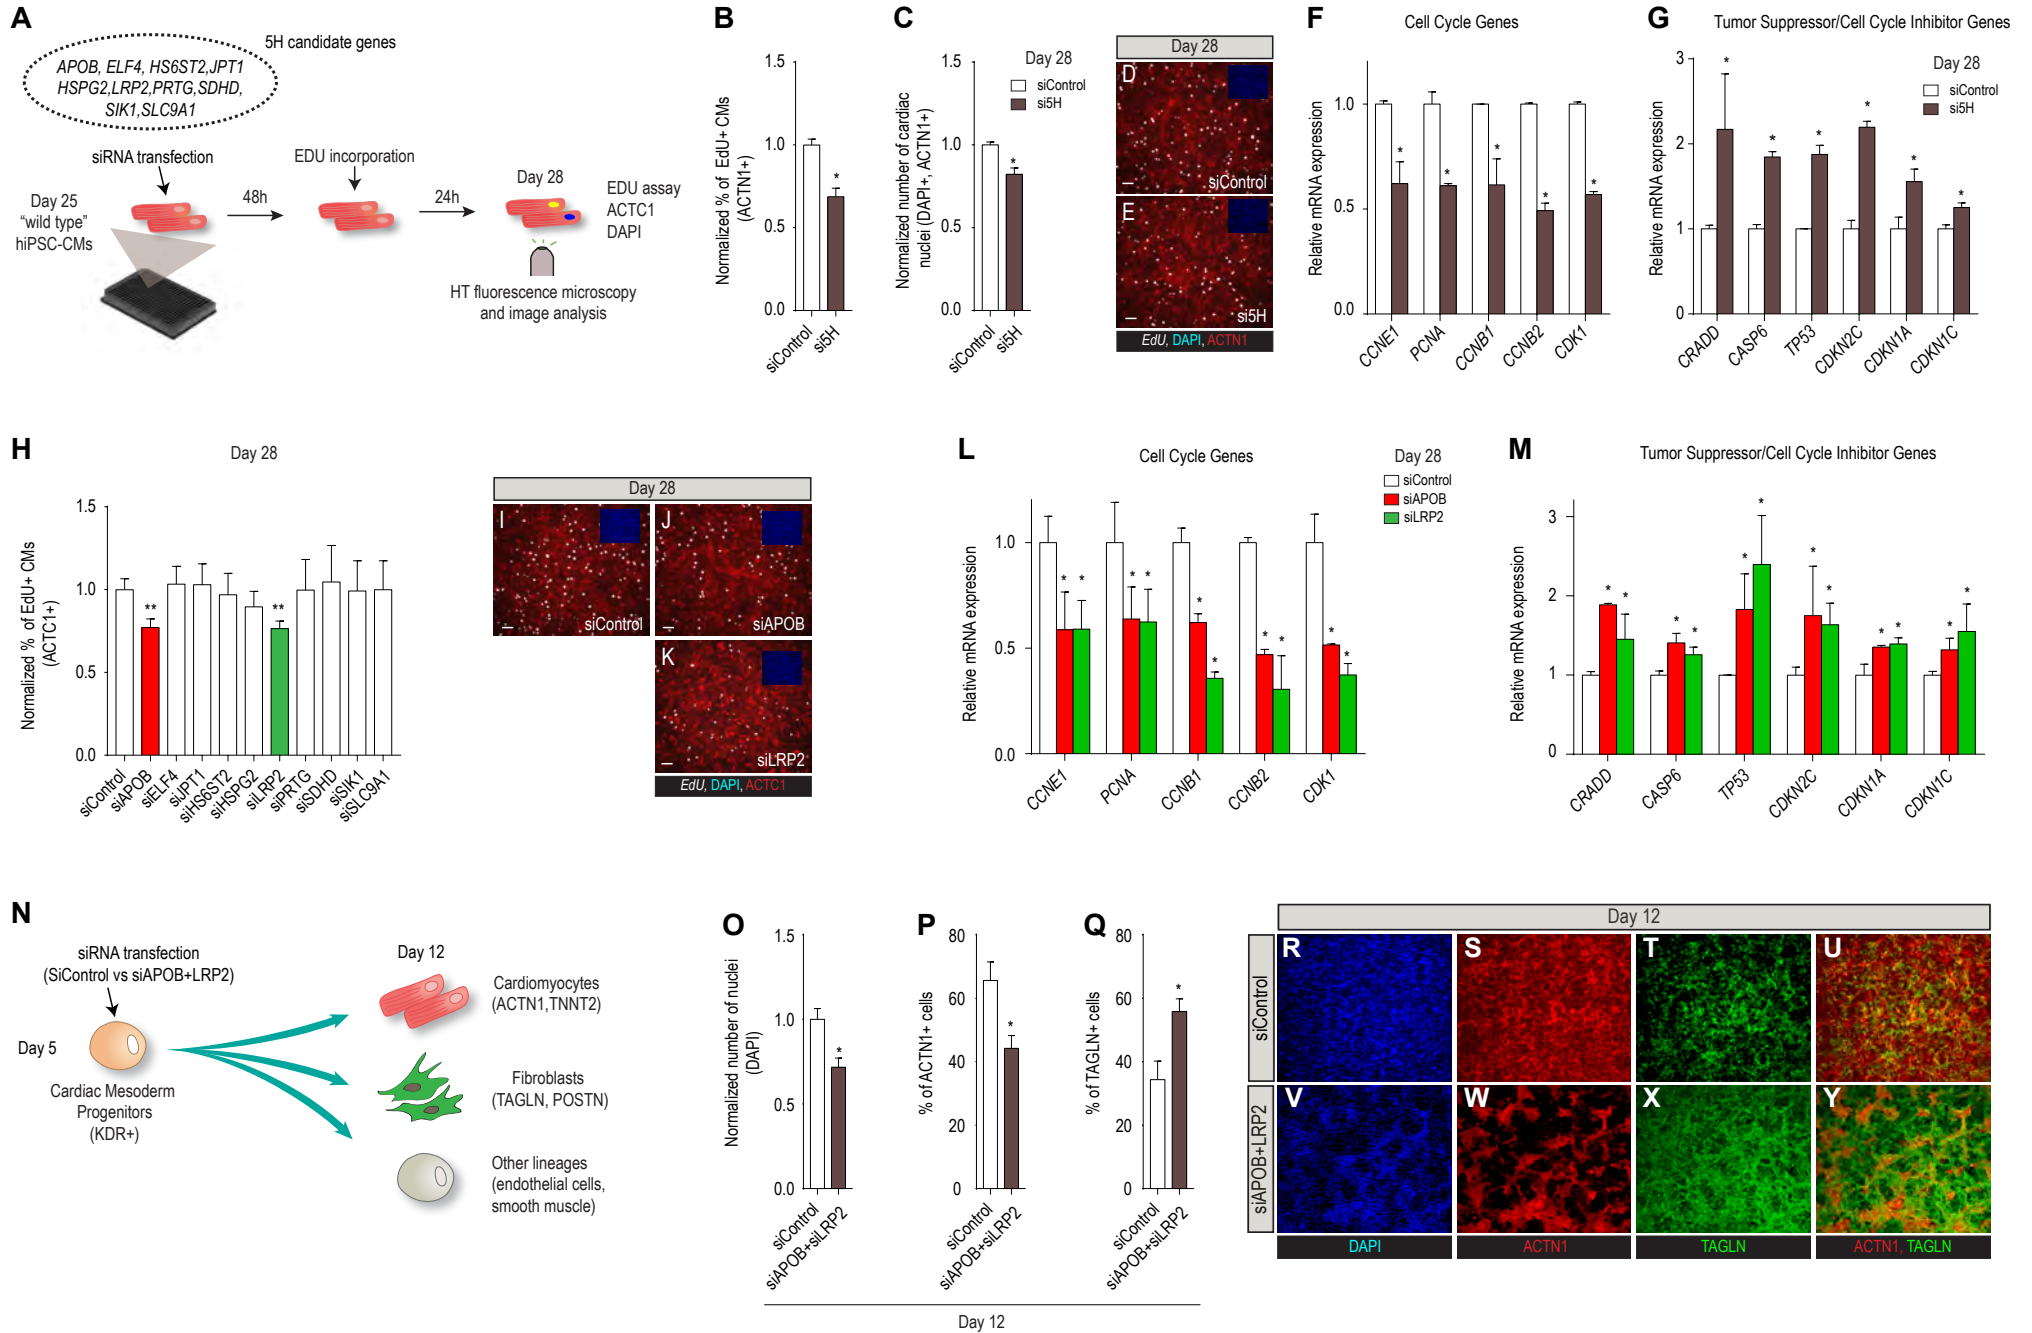

## Figure 5

**A**

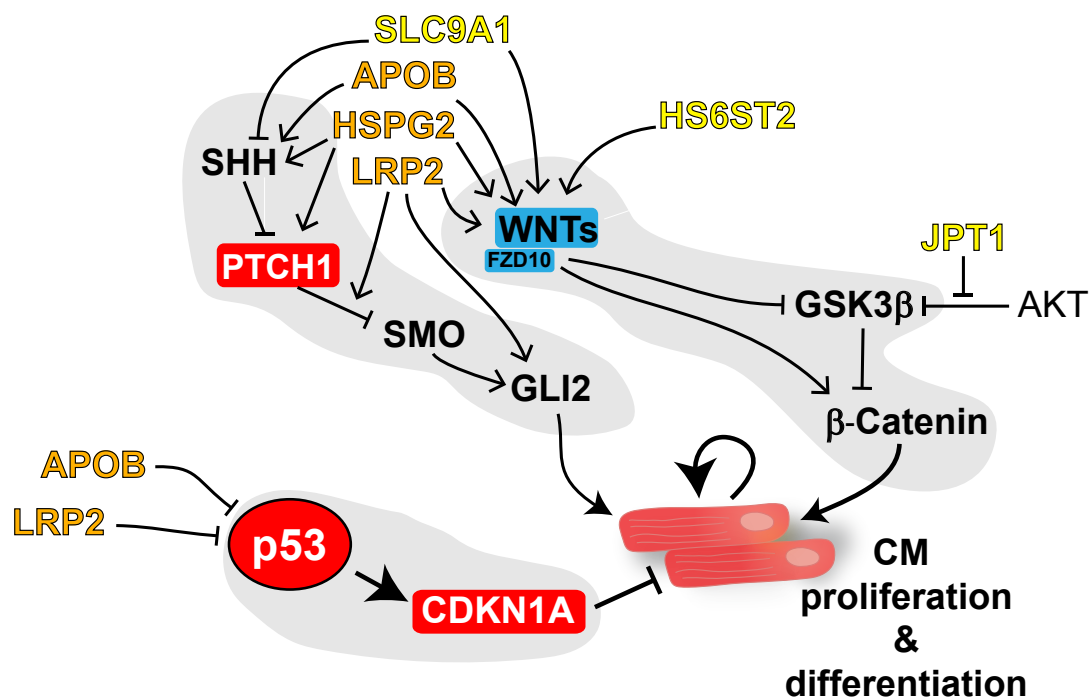

**B**

|                                     | HLHS (n=130) |                | Controls (n=861) |                | P-value |
|-------------------------------------|--------------|----------------|------------------|----------------|---------|
|                                     | Total SNVs   | Total Subjects | Total SNVs       | Total Subjects |         |
| <b>LRP2</b> Missense with CADD > 24 | 14           | 13 (10.0%)     | 29               | 29 (3.4%)      | 0.0008  |

HLHS variant positions

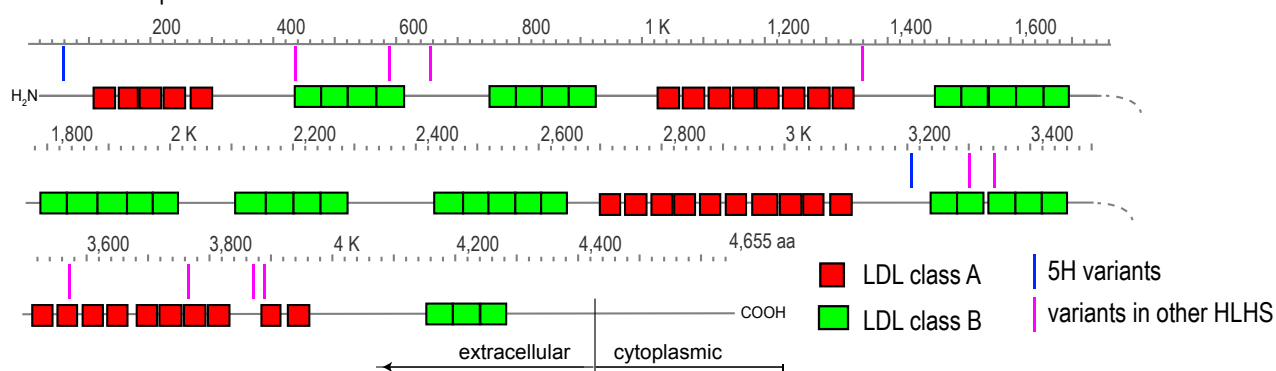

Source: https://biorxiv.org/content/biorxiv/early/2019/11/09/835439.full-text.pdf
