# Supplementary material for: Patient-specific functional genomics and disease modeling suggest a role for LRP2 in hypoplastic left heart syndrome
Source: bioRxiv preprint, doi:10.1101/835439, version 2 (2020-06-09)
Supplement: Supplemental Table 4 [file 835439_file02.xlsx]

## Sheet: Overlapped D0 DETs
gene_id	gene_short_name	locus	log2_fold_change_H1vsH3	p_value_H1vsH3	q_value_H1vsH3	UPorDOWN_H1vsH3	log2_fold_change_H1vsH4	p_value_H1vsH4	q_value_H1vsH4	UPorDOWN_H1vsH4	X5H1_0	X5H1_1	X5H1_2	X5H1_3	X5H3_0	X5H3_1	X5H3_2	X5H3_3	X5H4_0	X5H4_1	X5H4_2	X5H4_3
XLOC_000011	AGRN	chr1:954858-992129	-0.934346	2.11311e-10	3.8531e-08	UP	-0.582754	2.89565e-05	0.00109052	UP	52.0595	57.3788	58.4377	60.1543	32.3669	27.8095	30.6428	27.2507	33.281	38.8058	37.4801	40.9471
XLOC_000100	PLOD1	chr1:11994723-12035599	-0.796181	3.78423e-09	5.19806e-07	UP	-0.538564	5.56438e-05	0.0018481	UP	26.7405	30.5301	27.3758	27.3695	15.9909	15.5658	16.5647	16.0283	17.5703	20.4873	19.3432	19.2501
XLOC_000103	TNFRSF8	chr1:12123021-12207944	-1.1458	3.61933e-14	1.25641e-11	UP	-0.748924	1.17782e-06	7.80506e-05	UP	12.1893	13.6184	10.3636	13.0535	5.40457	5.03653	5.78855	5.94143	6.69679	8.20724	7.03866	7.01526
XLOC_000158	IGSF21	chr1:18434239-18705202	-1.21991	6.7896e-08	6.56533e-06	UP	-0.72577	0.00155641	0.0233422	UP	6.48049	6.74561	4.49956	5.54882	2.27188	2.46073	2.64729	2.54231	3.32867	3.76633	3.47607	3.37227
XLOC_000159	KLHDC7A	chr1:18807356-18816084	-0.758809	9.20727e-08	8.46885e-06	UP	-0.891088	9.19762e-10	1.47599e-07	UP	9.82476	10.3062	8.27583	8.93272	5.19495	4.94131	5.81378	5.89967	4.77284	5.59515	4.9138	4.70832
XLOC_000194	TCEB3	chr1:24066919-24104799	-0.522505	0.000550957	0.0107834	UP	-0.448335	0.0027211	0.0349635	UP	14.4524	14.7211	10.9422	11.5996	8.25143	8.37354	9.45015	9.59952	9.70525	10.126	9.05438	9.00643
XLOC_000229	TRNP1	chr1:27320118-27328982	-0.69151	2.64886e-05	0.00101837	UP	-0.496876	0.00283147	0.0360134	UP	16.117	16.2964	10.7802	12.6262	7.80093	8.13481	9.23373	9.68789	10.1449	10.9948	9.31599	9.035
XLOC_000241	SMPDL3B,XKR8	chr1:28261255-28294709	-0.949396	1.64009e-08	1.89252e-06	UP	-0.684666	3.41113e-05	0.00124146	UP	48.8693	54.7008	42.3889	46.923	22.3416	23.0742	27.479	26.3163	26.1988	32.8471	30.8844	28.6303
XLOC_000254	PTPRU	chr1:29563027-29653325	-0.836656	2.16713e-08	2.41016e-06	UP	-0.490017	0.00105863	0.0175414	UP	16.0103	17.4923	14.8079	14.334	7.94277	8.4227	9.06408	9.42497	10.0499	11.6977	11.5849	10.9531
XLOC_000262	SERINC2	chr1:31882411-31909185	-0.799658	8.11379e-07	5.63321e-05	UP	-0.634089	0.000112921	0.0032339	UP	15.3012	15.5792	12.6823	13.0567	7.95403	7.51011	8.78857	8.26523	9.01873	9.63606	8.89929	8.69195
XLOC_000273	LCK	chr1:32716839-32751766	-0.415585	0.00404694	0.0464075	UP	-0.450688	0.00215051	0.0294749	UP	21.793	22.4666	15.0107	17.2104	13.0836	13.0274	14.7331	16.0244	13.9013	16.0437	12.6547	12.9359
XLOC_000289	C1orf94	chr1:34631588-34689292	-1.18199	2.92881e-07	2.33646e-05	UP	-1.16595	1.753e-06	0.000108214	UP	5.69597	5.7026	4.07597	4.63503	1.82126	1.9899	2.35123	2.5406	2.1877	2.56606	2.04784	2.08011
XLOC_000313	AKIRIN1	chr1:39456439-39476762	-0.747028	2.03751e-07	1.71097e-05	UP	-0.437563	0.00150566	0.0227621	UP	98.7398	101.69	70.0257	77.7339	46.908	49.7483	54.7926	57.2085	63.6864	71.3217	62.8037	60.0343
XLOC_000314	NDUFS5	chr1:39491966-39500308	-0.496434	0.000600193	0.0115268	UP	-0.436487	0.00208058	0.0287888	UP	287.196	304.901	218.876	232.702	168.328	171.785	187.967	203.068	187.564	216.009	180.398	183.358
XLOC_000320	CAP1	chr1:40506254-40538321	-0.424533	0.00303012	0.0377359	UP	-0.399571	0.00350493	0.0418886	UP	72.987	76.4564	55.6808	56.7975	43.3588	45.3698	49.8219	55.5625	49.8729	53.8978	47.8913	46.7707
XLOC_000323	ZMPSTE24	chr1:40721930-40760691	-0.705457	7.59333e-07	5.29801e-05	UP	-0.520573	0.00022107	0.00539208	UP	26.7546	30.4035	24.0265	24.3762	14.733	15.6316	17.3509	17.5516	17.3037	20.2328	19.1402	17.543
XLOC_000345	TMEM125	chr1:43735664-43739999	-1.11048	1.15499e-08	1.39078e-06	UP	-0.928104	7.81291e-06	0.000377522	UP	7.68235	8.24752	5.42991	6.41743	2.63819	3.01775	3.56819	3.64535	3.2185	4.19638	3.62085	3.51171
XLOC_000346	TIE1	chr1:43766513-43788839	-0.754926	8.75366e-05	0.00264382	UP	-2.45836	0	0	UP	2.64934	2.868	2.26703	2.6911	1.68138	1.44164	1.54077	1.52185	0.46742	0.537154	0.431102	0.451982
XLOC_000350	PTPRF	chr1:43995039-44095280	-0.710362	5.82513e-06	0.000297774	UP	-0.421413	0.00390819	0.0452986	UP	79.8028	86.8368	79.9259	76.8728	47.304	47.9117	51.5038	49.85	54.6484	63.3046	60.3601	61.3072
XLOC_000369	HPDL	chr1:45792544-45794346	-1.1686	5.55112e-15	2.25762e-12	UP	-0.51531	0.000564793	0.0109945	UP	18.9794	18.5494	15.3104	15.0402	6.60615	6.78023	8.05489	8.51638	11.6358	12.2675	11.5436	11.5638
XLOC_000379	UQCRH	chr1:46769379-46782447	-0.415328	0.00229306	0.0308641	UP	-0.484987	0.000266811	0.00621106	UP	353.375	366.344	264.368	270.591	199.364	221.869	240.979	268.864	220.401	246.578	219.291	209.146
XLOC_000432	INADL	chr1:62207214-62639225	-0.435986	0.00181989	0.026218	UP	-0.434241	0.00188286	0.0267902	UP	7.203	7.78168	5.9323	6.44544	4.49892	4.81041	5.18432	5.66906	4.97991	5.17275	5.17396	5.00264
XLOC_000438	FOXD3	chr1:63784776-63792324	-1.44818	4.54029e-08	4.64476e-06	UP	-1.01732	0.00014188	0.00387595	UP	6.12773	6.12538	3.52288	4.85058	1.7374	1.74764	2.10069	2.09823	2.6983	2.92693	1.98923	2.53432
XLOC_000473	HHLA3	chr1:70724684-70833705	-0.767419	2.7775e-06	0.000159915	UP	-0.944428	8.92718e-09	1.11209e-06	UP	100.346	103.06	74.6399	99.2806	57.6308	48.9145	57.829	56.0023	46.6495	52.922	48.4685	47.2045
XLOC_000506	CYR61	chr1:85784167-86050560	-1.42046	2.22045e-16	1.09656e-13	UP	-0.757569	4.15958e-06	0.000224239	UP	42.7812	50.7119	37.1292	45.8717	14.3656	15.3865	17.1256	19.1134	24.358	27.2147	27.375	25.2921
XLOC_000518	LRRC8B	chr1:89990295-90063420	-0.640337	5.81284e-06	0.000297329	UP	-0.503475	0.000292707	0.00666247	UP	9.67125	10.5967	8.77924	8.77991	5.57274	5.83908	6.3402	6.78407	6.55389	6.98327	6.81749	6.49614
XLOC_000520	LRRC8D	chr1:90281217-90426441	-0.781	1.76097e-08	2.01796e-06	UP	-0.429065	0.00181825	0.0262138	UP	27.0019	29.4644	22.6433	23.3799	13.2717	14.6575	15.0052	16.7012	17.9605	20.5659	19.9208	17.907
XLOC_000569	NTNG1	chr1:107682626-108024671	-1.29357	0.000323034	0.00719872	UP	-1.41819	0.000476429	0.00963985	UP	0.628672	0.739352	0.510682	0.735086	0.224263	0.247217	0.290603	0.310754	0.227224	0.263574	0.25826	0.238272
XLOC_000593	SLC6A17	chr1:110693131-110744823	-1.06171	0.00113402	0.0184934	UP	-1.09696	0.0027726	0.0354822	UP	0.110953	0.114957	0.0898575	0.100645	0.0385495	0.0577959	0.0524003	0.0502074	0.0381567	0.0612055	0.0523321	0.0424048
XLOC_000622	OLFML3	chr1:114522029-114524875	-0.678881	4.77846e-07	3.53943e-05	UP	-0.385957	0.00353653	0.0421751	UP	54.7189	62.1613	57.3874	54.7591	33.4603	31.9257	38.0318	38.8884	37.321	45.9826	47.8659	43.3791
XLOC_000630	ATP1A1	chr1:116915127-116961326	-0.758907	7.40229e-06	0.000361258	UP	-0.602381	0.000114149	0.00326007	UP	183.667	213.918	177.513	185.239	104.913	107.874	116.438	118.584	114.284	137.735	125.886	122.646
XLOC_000666	LIX1L	chr1:145476689-145502700	1.15765	0.000185256	0.00468382	DOWN	0.979366	0.00313242	0.0386618	DOWN	0.794058	0.983459	1.01633	0.552677	2.02241	1.83828	1.67107	1.91599	1.56387	1.69713	1.76132	1.5599
XLOC_000679	GPR89B,GPR89C	chr1:147400505-147465755	-0.552932	0.000451903	0.00928954	UP	-0.476751	0.00418402	0.0475067	UP	7.99511	9.13526	7.36318	7.2976	5.10746	5.0769	5.69044	5.87678	5.36192	6.22117	5.89826	5.48884
XLOC_000717	CGN	chr1:151482383-151511391	-0.901677	3.47904e-11	7.47777e-09	UP	-0.715816	6.93492e-08	6.69805e-06	UP	30.4134	33.6522	28.7223	29.1685	15.2089	15.0207	16.556	17.5518	17.0484	19.3966	18.6426	18.7384
XLOC_000718	TUFT1	chr1:151512663-151557039	-0.546323	0.000889081	0.0154113	UP	-0.550182	0.00153769	0.0231325	UP	5.61995	5.53325	4.52087	4.60836	3.27211	3.23164	3.58773	3.72249	3.45456	3.47111	3.45466	3.44588
XLOC_000785	MSTO1	chr1:155579304-155584758	-0.499136	0.00422907	0.0478872	UP	-0.514317	0.00372038	0.0436841	UP	12.7168	12.9199	11.0569	11.3091	8.37694	7.76472	8.9768	8.69511	8.20254	8.53062	8.38966	8.3581
XLOC_000788	SYT11	chr1:155829259-155854990	-0.432534	0.00145387	0.0221895	UP	-0.424463	0.00173683	0.0254007	UP	12.542	12.7362	11.2871	10.6394	7.86911	8.85058	9.46733	8.72118	8.50374	8.95273	9.32486	8.48373
XLOC_000859	ATF6	chr1:161736033-161933860	-0.52622	0.00014338	0.00390035	UP	-0.552545	8.02124e-05	0.00247947	UP	6.02252	6.93576	5.84233	5.66103	4.09194	4.2041	4.30295	4.45019	4.01005	4.362	4.40027	3.99568
XLOC_000865	DDR2	chr1:162602181-162756509	-1.96053	6.66134e-15	2.63174e-12	UP	-1.84034	2.72282e-11	5.99209e-09	UP	1.76124	2.03149	1.23591	1.84849	0.52963	0.388669	0.408428	0.444778	0.49325	0.499583	0.540669	0.398972
XLOC_000891	ATP1B1	chr1:169075232-169337186	-0.713271	1.28502e-06	8.38814e-05	UP	-0.454017	0.00161735	0.0240303	UP	26.5033	31.3475	24.3525	24.4707	14.0249	15.8668	17.208	18.205	18.0516	21.8202	19.885	18.3715
XLOC_000904	METTL13	chr1:171750456-171773438	-0.518539	0.000188738	0.0047451	UP	-0.411157	0.00319694	0.0391886	UP	16.1487	16.5186	12.2993	12.9813	9.19475	9.51416	10.6242	10.8945	11.3639	11.6501	10.2128	10.2542
XLOC_000910	PRDX6	chr1:173446398-173639399	-0.626347	1.77304e-05	0.000733625	UP	-0.728391	1.64462e-07	1.4169e-05	UP	206.464	216.007	145.936	162.801	103.187	110.198	123.891	136.959	111.006	122.214	107.438	102.818
XLOC_000948	LAMC2	chr1:183154846-183388047	-0.917983	5.74063e-07	4.17421e-05	UP	-0.804705	2.1019e-05	0.000845305	UP	5.90466	7.18441	4.83743	6.36953	2.78977	3.13334	3.35377	3.47241	3.0021	3.8329	3.55762	3.46819
XLOC_000995	PKP1	chr1:201252579-201302121	-1.48512	4.44377e-08	4.55725e-06	UP	-2.40466	2.2633e-12	6.21778e-10	UP	0.37364	0.388645	0.300249	0.27929	0.114737	0.112377	0.111311	0.137876	0.0611623	0.0740847	0.0574891	0.0591148
XLOC_001028	LEMD1	chr1:205342379-205440051	0.66848	0.000145285	0.00393913	DOWN	0.691221	5.51842e-05	0.00183724	DOWN	0.668571	0.867187	1.46515	0.968737	1.06276	1.61524	1.68528	1.58287	1.08694	1.55779	1.86726	1.95528
XLOC_001045	CD55	chr1:207494511-207540481	-0.739812	3.40351e-06	0.000189896	UP	-0.57567	0.000482457	0.00973668	UP	8.86966	10.5675	8.45875	8.47446	4.79418	5.28457	5.59856	6.24095	5.32054	6.60994	6.74998	5.86523
XLOC_001046	CR2	chr1:207627644-207663240	-0.70503	0.000137179	0.00377737	UP	-1.15285	2.95165e-08	3.19695e-06	UP	2.16936	2.76801	1.92153	2.35031	1.3275	1.35523	1.45651	1.52116	0.933341	1.16331	1.06526	0.989304
XLOC_001092	2012-03-01	chr1:220958314-221006011	-0.728112	5.91727e-06	0.00030137	UP	-0.500178	0.00202488	0.0282775	UP	19.0301	19.4266	15.1648	15.0624	9.05763	9.74286	11.0944	11.4989	11.7889	13.5696	12.1244	11.0344
XLOC_001093	HLX	chr1:221052742-221058400	-1.09983	0.00113845	0.0185274	UP	-1.21685	0.00146055	0.022263	UP	0.249835	0.25905	0.321387	0.269789	0.146676	0.123144	0.111544	0.124617	0.107	0.124196	0.121929	0.115751
XLOC_001102	DEGS1	chr1:224370909-224381142	-0.773685	1.22191e-08	1.45867e-06	UP	-0.581088	1.63542e-05	0.000689804	UP	38.3262	43.2659	34.6078	35.4264	19.9072	21.0273	23.3556	24.9042	23.5616	27.9915	26.4689	23.6748
XLOC_001109	EPHX1	chr1:225997796-226071197	-0.96803	4.28748e-08	4.42982e-06	UP	-0.892663	2.27644e-07	1.87927e-05	UP	31.3721	35.5784	26.9171	30.4387	14.3072	14.706	16.7748	17.3039	14.7367	18.7208	17.4262	15.7596
XLOC_001111	MIXL1	chr1:226411000-226415313	2.12127	3.9758e-10	6.88635e-08	DOWN	1.15266	0.00318021	0.0390657	DOWN	0.479762	1.07649	1.11843	0.530987	3.82022	2.2445	3.72005	3.86553	2.21686	1.37967	2.06002	1.23682
XLOC_001113	PSEN2	chr1:227057956-227096966	-0.818836	2.10323e-06	0.000125899	UP	-0.532529	0.00333303	0.0404103	UP	9.88907	11.6759	9.55626	10.2426	5.70178	5.54857	6.08258	5.96777	6.73899	7.61445	7.0964	7.10213
XLOC_001120	WNT3A	chr1:228194722-228248972	1.77925	3.96181e-07	3.0211e-05	DOWN	2.21591	1.00932e-09	1.6042e-07	DOWN	0.0582336	0.047732	0.151494	0.0535618	0.4061	0.202501	0.208414	0.219002	0.43391	0.314133	0.442264	0.221421
XLOC_001159	EDARADD	chr1:236557679-236648008	-0.754357	4.27294e-05	0.00148703	UP	-0.583812	0.00297121	0.0372258	UP	2.9058	2.81267	2.1182	2.15571	1.35867	1.32223	1.51983	1.677	1.65009	1.83651	1.57963	1.57746
XLOC_001247	MXRA8	chr1:1286623-1297823	-1.08446	3.60485e-07	2.7744e-05	UP	-0.855479	0.000155522	0.00414223	UP	4.0155	3.98589	4.14704	3.54902	1.94217	1.76313	1.83509	1.85405	2.023	2.22367	2.34737	2.07479
XLOC_001291	KLHL21	chr1:6615337-6662929	-0.898403	2.40947e-07	1.9695e-05	UP	-0.78734	6.28487e-06	0.000317003	UP	8.62817	8.71472	7.00543	7.47502	4.07381	3.94884	4.61483	4.39405	4.60252	4.84764	4.43247	4.45794
XLOC_001311	SRM	chr1:11114648-11120091	-0.589037	1.54407e-05	0.000657965	UP	-0.540284	6.87466e-05	0.00219539	UP	70.3405	69.7469	51.6954	54.4524	37.6667	36.1597	44.496	43.6839	43.2478	46.1415	38.8445	39.0882
XLOC_001319	KIAA2013	chr1:11979644-11986485	-0.924051	2.82663e-11	6.17142e-09	UP	-0.599682	1.59361e-05	0.000676642	UP	19.5122	21.1325	17.2833	17.6446	9.26329	9.46087	10.6985	10.2496	11.8605	13.291	12.374	11.9554
XLOC_001320	DHRS3	chr1:12627870-12687781	-1.35978	2.66454e-15	1.12216e-12	UP	-0.80261	4.04452e-06	0.000219175	UP	13.2386	13.7221	9.691	10.8354	3.89411	4.32895	5.35542	4.92885	5.85942	7.30663	7.24462	6.68777
XLOC_001346	EPHA2	chr1:16450803-16482582	-0.611962	8.67758e-06	0.000411162	UP	-0.708303	4.03812e-07	3.0652e-05	UP	13.1142	13.888	14.3206	13.7846	9.14177	8.63568	8.91776	9.1011	8.1495	8.45259	8.15471	8.71907
XLOC_001347	ARHGEF19	chr1:16524598-16539273	-0.790944	5.95072e-07	4.29684e-05	UP	-0.617754	9.25253e-05	0.00276529	UP	15.9493	16.3566	14.3175	14.0045	7.62211	7.79687	9.5285	9.6736	9.18007	10.0884	10.2626	9.62381
XLOC_001359	MFAP2	chr1:17300998-17308081	-0.675492	3.83575e-06	0.000209642	UP	-0.546012	0.000163932	0.00429317	UP	109.292	111.972	93.7429	91.7513	60.3383	58.0764	69.5477	65.3582	65.7357	75.8115	70.1661	64.811
XLOC_001368	IFFO2	chr1:19230773-19282826	-0.703634	2.73998e-05	0.00104662	UP	-0.954011	2.01207e-07	1.69304e-05	UP	2.15349	2.23902	1.67018	1.77034	1.151	1.11147	1.19449	1.33119	1.0605	1.08327	0.934912	0.956168
XLOC_001382	DDOST,KIF17	chr1:20959947-21044317	-0.663038	1.39963e-05	0.000608169	UP	-0.480781	0.000897511	0.0155034	UP	140.155	150.001	123.928	124.904	79.7358	80.3341	89.2734	89.7707	90.7439	104.962	96.4484	93.5392
XLOC_001432	FAM46B	chr1:27331510-27339333	-0.95454	2.59859e-12	7.03522e-10	UP	-0.402388	0.00259533	0.0337923	UP	52.0864	49.1866	33.9347	39.1417	20.2736	20.7963	24.5116	23.7829	32.4949	36.2374	31.1023	30.949
XLOC_001433	SLC9A1	chr1:27425299-27481451	-0.71146	3.64239e-07	2.80069e-05	UP	-0.465746	0.000927652	0.0158983	UP	9.75064	10.3637	8.73164	9.2552	5.76395	5.40964	6.19863	5.81979	6.47974	7.4463	6.87527	6.69623
XLOC_001445	SNHG12,SNORA16A,SNORA44,SNORA61	chr1:28878706-28909457	-1.41367	3.66096e-08	3.86923e-06	UP	-0.864258	0.000591286	0.0114005	UP	21.8309	25.1071	22.0742	27.4567	8.84178	8.31701	11.123	11.6345	11.8948	18.4374	13.2208	13.8414
XLOC_001499	GRIK3	chr1:37260902-37501197	-1.48429	3.10333e-09	4.3937e-07	UP	-0.752299	0.000347754	0.00759257	UP	0.886381	0.995712	0.866084	0.801143	0.267691	0.326301	0.320348	0.348073	0.491021	0.538609	0.592355	0.479945
XLOC_001503	GNL2	chr1:38022519-38061586	-0.461548	0.00133761	0.0208837	UP	-0.437335	0.00200757	0.0281117	UP	42.4251	44.0091	33.5592	33.3098	25.4194	25.5272	27.8915	30.8655	28.5408	29.882	27.3687	27.2753
XLOC_001552	SLC2A1	chr1:43391045-43451487	-0.829519	9.60192e-09	1.18547e-06	UP	-0.545367	7.44303e-05	0.00234175	UP	87.0743	94.0477	88.2315	88.7623	51.1026	48.8863	52.0677	48.6482	59.1257	62.2125	57.8519	65.3761
XLOC_001553	EBNA1BP2	chr1:43629844-43720305	-0.537732	0.000205773	0.00508555	UP	-0.500996	0.000677578	0.0125566	UP	40.8765	41.7965	29.6085	32.265	20.9794	22.8056	24.9681	27.6597	26.6494	28.5067	23.7788	22.9709
XLOC_001615	TMEM48	chr1:54231133-54304225	-0.584148	3.20805e-05	0.00118568	UP	-0.412711	0.0021217	0.0291825	UP	37.841	42.2221	32.6084	31.5529	21.5104	23.6271	25.6633	26.6911	26.1598	29.8081	28.2941	24.94
XLOC_001626	DHCR24	chr1:55271735-55352921	-0.63979	0.000142023	0.00387641	UP	-0.498913	0.00118639	0.0190755	UP	234.618	254.345	183.471	199.078	129.373	129.78	150.083	147.54	154.433	171.273	149.753	139.814
XLOC_001628	PPAP2B	chr1:56948540-57047717	-0.936075	2.05094e-11	4.58647e-09	UP	-0.541537	8.85014e-05	0.00266616	UP	22.6584	24.3903	20.5849	20.8129	10.5614	10.968	12.2505	12.5039	13.7962	16.505	16.1294	14.39
XLOC_001649	FOXD3	chr1:63784776-63792324	-0.869729	0.000283163	0.00648902	UP	-0.784153	0.00101585	0.0170093	UP	25.8574	29.7135	19.3075	22.2508	11.1111	12.1727	13.8112	16.0597	13.2322	15.9281	12.8344	13.9408
XLOC_001696	MCOLN3	chr1:85481228-85514404	-0.965985	5.6751e-05	0.0018781	UP	-0.776916	0.00223504	0.0302796	UP	1.91202	2.11625	2.20602	2.26987	0.91101	1.00033	1.2328	1.20816	1.08212	1.2358	1.42364	1.23547
XLOC_001737	DNTTIP2	chr1:94335013-94344762	-0.510772	0.000165489	0.00432304	UP	-0.440024	0.000997079	0.0167525	UP	36.4408	38.5332	28.0254	29.0573	20.6481	21.556	23.5472	25.5304	24.7342	26.0845	23.73	23.1802
XLOC_001741	F3	chr1:94994731-95007413	-1.05273	7.52939e-08	7.19681e-06	UP	-1.15581	2.72952e-07	2.19862e-05	UP	3.8922	4.38241	3.77378	3.73255	1.80191	1.68254	2.07143	2.06156	1.76639	1.75418	1.79511	1.77118
XLOC_001756	COL11A1	chr1:103342022-103574368	-0.60995	2.30349e-05	0.000908755	UP	-0.42242	0.00379177	0.0443394	UP	4.34623	5.30823	4.20459	5.16548	3.41134	3.10015	2.89848	3.11775	3.29781	3.52201	3.66135	3.76265
XLOC_001771	PSMA5	chr1:109941652-109969108	-0.452146	0.00113413	0.0184934	UP	-0.434129	0.00175736	0.0256075	UP	22.1516	22.886	17.0927	16.8869	12.9993	13.5284	14.8345	17.2396	14.9034	16.1449	14.2378	13.7971
XLOC_001800	SLC16A1	chr1:113454469-113498975	-0.867848	6.34088e-07	4.52907e-05	UP	-0.500647	0.0017182	0.025206	UP	290.247	346.174	286.641	299.9	156.141	164.026	174.104	179.042	185.56	241.484	225.166	216.493
XLOC_001813	TSPAN2	chr1:115590632-115632121	-0.883522	5.53378e-09	7.25301e-07	UP	-0.631383	4.98677e-05	0.0016887	UP	7.68251	8.44347	6.27064	7.12136	3.58823	3.87393	4.14414	4.58505	4.34996	5.10879	5.20739	4.57321
XLOC_001856	GPR89A	chr1:145764594-145827103	-0.630147	0.000231198	0.00557758	UP	-0.548545	0.00222157	0.0301513	UP	8.77104	10.1138	8.10019	8.35711	5.36447	5.39877	5.98216	6.18834	5.70647	6.57487	6.09483	5.89575
XLOC_001898	CERS2	chr1:150937648-150947479	-0.686527	6.647e-07	4.70943e-05	UP	-0.404692	0.00268657	0.0346809	UP	64.281	68.2835	56.1666	55.0195	33.637	35.3572	40.0205	42.3871	43.2677	49.2575	48.1437	43.4272
XLOC_001915	S100A10	chr1:151955385-151966714	-0.778615	5.00227e-07	3.67507e-05	UP	-0.743876	4.27424e-06	0.000229228	UP	23.6327	27.2308	17.069	19.5405	10.5425	11.8001	12.663	15.8053	12.4415	14.3553	13.2049	12.159
XLOC_001947	S100A14	chr1:153586731-153588808	-1.48151	3.57753e-05	0.00128546	UP	-1.09977	0.00345195	0.0414447	UP	0.854844	0.824542	0.753369	0.72804	0.228547	0.183579	0.363541	0.342222	0.329497	0.458007	0.39241	0.294767
XLOC_001952	CRTC2,SLC39A1	chr1:153920147-153952217	-0.816482	1.39441e-06	8.91284e-05	UP	-0.495158	0.00200277	0.0280679	UP	118.663	125.731	102.878	101.924	56.9207	60.3011	68.2727	69.6128	76.3195	86.8363	79.9251	75.0322
XLOC_001983	SSR2	chr1:155978838-155990758	-0.562207	3.30889e-05	0.00121418	UP	-0.433751	0.00108771	0.0179397	UP	112.909	119.51	92.0503	91.6729	61.5627	66.2394	75.0397	78.5826	75.1074	83.5685	77.751	71.7557
XLOC_002029	CCDC19,TAGLN2	chr1:159842006-159895327	-0.719342	5.6703e-07	4.13031e-05	UP	-0.757887	2.67705e-07	2.16055e-05	UP	34.4233	36.0403	27.935	26.3928	16.9926	16.9971	19.9271	21.5876	18.3811	19.7931	17.4032	17.9186
XLOC_002033	IGSF8	chr1:160048976-160068618	-0.827951	1.74053e-08	2.00006e-06	UP	-0.475857	0.00133412	0.0208567	UP	38.3924	41.7047	34.6179	39.7565	22.4683	20.3544	22.3035	21.3398	25.0784	30.4364	27.0738	27.4557
XLOC_002046	F11R	chr1:160965000-160991133	-0.690982	4.20224e-06	0.000226244	UP	-0.470739	0.000899298	0.015531	UP	90.2545	100.541	81.0158	81.1357	48.4421	51.8585	58.2701	60.4973	58.2381	70.4813	67.0461	59.7759
XLOC_002052	ADAMTS4	chr1:161147765-161168845	-1.00075	3.01748e-11	6.5365e-09	UP	-0.620203	4.72953e-05	0.00161744	UP	6.47192	6.90684	7.78555	7.06874	3.59077	3.40278	3.58942	3.48126	4.01033	4.67683	4.66433	4.93183
XLOC_002066	RGS5	chr1:163112088-163325553	-1.29751	5.3588e-10	9.05495e-08	UP	-0.886433	6.52887e-06	0.000327098	UP	9.61071	10.4289	6.74911	8.03237	3.30709	3.32675	3.5815	4.16881	4.8549	5.16458	4.48907	4.51654
XLOC_002084	CREG1	chr1:167510250-167523056	-0.804831	2.33458e-08	2.57226e-06	UP	-0.547574	0.00017428	0.00448073	UP	19.4307	21.2925	15.5038	15.8949	8.73706	9.70109	11.2842	11.7997	11.392	13.9962	12.9632	11.2505
XLOC_002199	LAD1,TNNT2	chr1:201325610-201369073	-1.19405	5.14098e-10	8.72243e-08	UP	-0.997622	1.54593e-07	1.33865e-05	UP	16.4999	16.1759	11.2117	13.2054	4.73873	5.58926	6.32644	6.96535	6.72713	7.5501	6.86251	6.49612
XLOC_002211	CYB5R1	chr1:202931000-202936404	-0.704207	2.51557e-05	0.000977093	UP	-0.510913	0.00358355	0.0425401	UP	7.86103	8.36659	7.52177	6.62257	4.33151	4.23588	4.92657	5.0875	5.08315	5.7575	5.77967	4.6661
XLOC_002270	SLC30A1	chr1:211744781-211755844	-1.28039	8.71498e-10	1.40671e-07	UP	-1.33041	7.91488e-10	1.29011e-07	UP	9.34093	12.7449	9.21154	9.3673	3.78459	4.06692	4.4252	4.49441	3.46456	4.74829	4.11291	3.89699
XLOC_002321	CDC42BPA	chr1:227124610-227507849	-0.521509	0.000772754	0.0138831	UP	-0.548767	0.000227992	0.00552119	UP	10.2009	11.1445	8.43213	9.56255	6.50271	6.55954	7.12449	7.25038	6.63836	7.05987	6.69825	6.61568
XLOC_002337	ACTA1	chr1:229566992-229569843	-1.44868	1.84389e-10	3.42237e-08	UP	-1.34173	8.61099e-08	8.05433e-06	UP	2.85809	3.49517	1.96766	2.67705	0.79277	0.923666	1.03852	1.22154	1.06914	0.97931	1.25636	0.995156
XLOC_002357	IRF2BP2	chr1:234740014-234745271	-0.580247	3.46204e-05	0.00125374	UP	-0.516542	0.000366675	0.00792186	UP	10.2609	10.6273	9.2604	9.20663	6.21657	6.30661	6.68836	7.29882	6.51478	7.0936	7.0928	6.87243
XLOC_002368	NID1	chr1:236139131-236228481	-0.869598	1.16336e-10	2.22908e-08	UP	-0.63561	1.84527e-06	0.00011284	UP	14.6528	16.9398	16.237	16.6516	9.20586	8.33811	8.49051	9.19385	8.99357	11.2252	10.3325	10.9045
XLOC_002443	TTC34	chr1:2572806-2706230	2.36127	7.91148e-05	0.00245011	DOWN	2.41576	0.000162011	0.0042577	DOWN	0.0242338	0.00723003	0.00918406	0.015282	0.0831874	0.0893305	0.0419884	0.0728949	0.108206	0.0816996	0.0537061	0.0548338
XLOC_003621	GTPBP4	chr10:1019573-1064522	-0.600555	2.05884e-05	0.000829194	UP	-0.478503	0.000568587	0.0110554	UP	40.1498	41.5441	31.2156	32.8109	21.7715	22.3535	24.4682	26.447	26.0438	28.0361	25.1465	25.5214
XLOC_003626	PFKP	chr10:3107208-3215033	-0.700837	1.40582e-05	0.000610015	UP	-0.643731	4.07892e-05	0.00143213	UP	42.8614	43.0722	32.4594	36.1483	20.9498	22.1777	24.5838	25.8754	24.2674	25.8253	23.0203	24.7371
XLOC_003645	LOC100507127	chr10:6821559-6885035	-1.26169	0.0015036	0.0227446	UP	-1.98244	1.30026e-05	0.000572295	UP	1.39958	1.77757	1.22636	1.58977	0.520031	0.581363	0.672197	0.741556	0.317443	0.400724	0.419389	0.389734
XLOC_003714	BAMBI	chr10:28966423-28971868	-1.08631	2.29148e-10	4.16919e-08	UP	-0.920132	4.06341e-07	3.08158e-05	UP	7.69923	8.37705	6.61668	6.60481	3.16708	3.02138	3.28959	4.25436	3.70862	4.05626	4.16235	3.51497
XLOC_003717	MAP3K8	chr10:30721542-30750762	-0.762944	0.00102638	0.0171406	UP	-0.90998	0.000449847	0.00925645	UP	2.47267	2.51152	2.20312	2.09957	1.35021	1.31633	1.32436	1.48183	1.13754	1.30367	1.27117	1.23347
XLOC_003719	ZEB1	chr10:31608100-31818742	1.60801	1.54734e-07	1.33865e-05	DOWN	1.58901	9.61753e-07	6.54576e-05	DOWN	0.141958	0.13714	0.379599	0.120818	0.741219	0.643703	0.582786	0.428598	0.653661	0.576426	0.573061	0.569449
XLOC_003801	LRRTM3	chr10:67672205-69455949	-1.73093	1.52689e-06	9.63343e-05	UP	-1.44881	0.000154579	0.00412484	UP	0.587168	0.632604	0.460312	0.530811	0.167003	0.138709	0.184464	0.177314	0.219325	0.185759	0.208354	0.19722
XLOC_003810	DDX21	chr10:70706826-70744744	-0.551625	0.000536685	0.0105726	UP	-0.461835	0.00207195	0.0287365	UP	94.4262	100.236	71.1219	74.9061	50.1366	54.7247	60.0985	66.3733	62.4663	67.4742	59.2532	59.3629
XLOC_003814	SUPV3L1	chr10:70939933-70968884	-0.546826	0.00018705	0.00471301	UP	-0.441884	0.00314781	0.0387889	UP	14.955	15.7018	12.4278	12.4699	9.05015	8.86256	9.82615	10.3141	10.3294	10.9372	9.99298	9.75186
XLOC_003826	UNC5B	chr10:72972206-73065404	-0.759236	2.31139e-08	2.55348e-06	UP	-0.447139	0.000869542	0.0151521	UP	24.7677	24.9707	20.3065	21.7528	12.218	13.0609	14.4374	14.2093	16.1367	18.1893	16.2648	16.3174
XLOC_003841	PLAU	chr10:75669726-75682535	-0.995531	2.85276e-11	6.21213e-09	UP	-0.540549	0.000403724	0.00854426	UP	13.2944	15.141	12.8578	13.2702	5.83604	6.5058	7.27425	7.6442	8.19341	10.1779	9.90473	9.13049
XLOC_003857	PPIF	chr10:81106025-81117804	-0.603544	1.32518e-05	0.000581718	UP	-0.676732	1.30504e-06	8.49204e-05	UP	30.7367	30.6716	22.6978	23.2655	16.5226	16.1382	18.4488	19.6161	16.992	18.7617	16.1503	15.2439
XLOC_004006	PDCD11	chr10:105156411-105206019	-0.556692	6.82323e-05	0.00218317	UP	-0.440538	0.000980485	0.0165608	UP	39.1121	41.101	33.7687	34.0071	22.9702	23.2984	25.8961	27.0575	26.6193	28.8261	27.4704	25.8521
XLOC_004024	ADRA2A	chr10:112836789-112840662	-2.1472	0	0	UP	-0.777683	6.31335e-05	0.00204607	UP	2.22685	2.50022	1.80887	1.90485	0.430094	0.463584	0.480849	0.540506	1.04835	1.35113	1.42623	1.12356
XLOC_004074	LOC399815	chr10:124591550-124658230	-1.19606	0.00239908	0.0319336	UP	-1.73133	0.000158085	0.00418665	UP	2.25285	2.4372	2.6915	2.4564	1.01738	0.98004	1.03135	1.27077	0.671579	0.740211	0.814108	0.744724
XLOC_004080	HMX2	chr10:124907637-124910188	2.30381	8.10729e-12	1.97832e-09	DOWN	1.33227	0.000604583	0.0115843	DOWN	0.163122	0.107392	0.169962	0.109735	0.670675	0.642617	0.730444	0.670531	0.36029	0.388885	0.312406	0.317372
XLOC_004155	SFMBT2	chr10:7197740-7455212	-0.729111	1.08499e-05	0.000491362	UP	-0.759784	8.97334e-06	0.000421874	UP	2.64071	2.63517	2.2112	2.40853	1.33665	1.44191	1.53909	1.64763	1.42555	1.45914	1.50223	1.46358
XLOC_004156	ITIH5	chr10:7601091-7708961	-0.7198	0.000753583	0.0136391	UP	-1.14824	1.68347e-06	0.000104466	UP	2.49525	2.70461	1.94274	2.48918	1.33463	1.40344	1.42055	1.65002	1.07183	1.19648	1.06419	1.00624
XLOC_004176	FAM107B	chr10:14560558-14816896	-0.493496	0.0015885	0.0237163	UP	-0.573846	0.000281932	0.00647047	UP	10.9586	11.5499	8.84175	8.6632	6.3119	6.71068	7.12244	8.35896	6.82367	7.13594	6.8448	6.24737
XLOC_004188	RSU1	chr10:16632616-16859453	-0.538621	6.86914e-05	0.00219539	UP	-0.409924	0.00231583	0.0310748	UP	19.426	21.1424	15.3245	17.3653	11.9203	12.0702	12.9918	13.5302	13.1485	14.8148	13.832	13.419
XLOC_004193	PTPLA	chr10:17630253-17659917	-1.10361	2.55848e-08	2.80035e-06	UP	-0.818982	6.90651e-05	0.00220221	UP	10.4348	11.544	8.47368	9.15248	3.92228	4.44234	4.89199	5.37612	5.17008	6.32823	5.76221	5.32822
XLOC_004233	ITGB1	chr10:33189245-33254197	-0.686253	6.82772e-06	0.000339203	UP	-0.559141	8.25968e-05	0.00253242	UP	132.014	157.06	130.51	133.53	79.5327	84.1344	86.003	95.5258	85.6655	101.877	96.4448	92.6443
XLOC_004249	ZNF33B	chr10:43076236-43134349	-0.703177	5.94328e-06	0.000302324	UP	-0.559884	0.000360127	0.00780927	UP	7.38247	8.32993	6.83041	7.72353	4.81434	4.38349	4.86493	4.63914	4.80498	5.49108	5.20805	5.14653
XLOC_004257	CXCL12	chr10:44865604-44880545	-0.784535	1.683e-05	0.000706265	UP	-0.764008	2.3781e-05	0.000934634	UP	30.9421	32.1667	23.991	25.3607	15.733	14.8686	16.8274	18.027	16.0717	18.2786	17.1954	14.859
XLOC_004297	TIMM23	chr10:51592087-51623336	-0.479795	0.000479473	0.00969061	UP	-0.405051	0.00320452	0.039248	UP	59.5555	61.0385	45.8672	45.9446	34.7618	35.61	39.3677	42.3037	40.5814	43.2528	39.2862	37.3188
XLOC_004351	DNAJB12	chr10:74090742-74118821	-0.85147	4.15597e-07	3.13744e-05	UP	-0.58175	0.000666256	0.012405	UP	7.54499	8.10183	6.42512	6.34443	3.70115	3.71038	4.2135	4.03954	4.84981	4.84196	4.77263	4.42752
XLOC_004380	MAT1A	chr10:82030329-82049731	-0.80117	5.89594e-05	0.00193625	UP	-1.1984	4.20004e-07	3.16359e-05	UP	2.16093	2.47322	1.45535	1.87188	0.953146	1.07388	1.15444	1.33905	0.805162	0.957564	0.867985	0.82469
XLOC_004406	LIPA	chr10:90973325-91011660	-0.730067	1.08965e-07	9.81582e-06	UP	-0.671228	7.12125e-07	5.00273e-05	UP	40.157	48.0408	30.6669	40.219	21.5903	23.3633	25.1918	26.5113	23.0047	27.9797	25.222	24.2784
XLOC_004419	LOC100188947	chr10:93066718-93371217	-0.640266	0.00172716	0.0252904	UP	-1.04334	1.55244e-06	9.77239e-05	UP	25.8391	27.9264	22.4779	28.6674	18.0708	15.6923	16.5993	17.1597	12.2181	13.0269	12.8946	12.7548
XLOC_004439	PDLIM1	chr10:96997329-97050781	-1.22425	0	0	UP	-1.06826	1.19904e-14	4.46097e-12	UP	62.5529	67.1112	45.7665	49.1189	18.9917	20.8043	25.3795	29.7114	25.3534	29.3804	27.4988	24.2765
XLOC_004441	ALDH18A1	chr10:97365685-97416567	-0.660617	1.93829e-06	0.000117381	UP	-0.522389	9.52478e-05	0.00283238	UP	58.639	64.4745	52.9764	56.4769	35.0588	35.2455	37.9842	38.5337	37.8507	43.639	39.8941	40.2583
XLOC_004454	FRAT2	chr10:99084281-99100803	-1.19302	0	0	UP	-0.684606	1.22242e-06	8.05552e-05	UP	39.9344	40.5279	30.8332	30.5399	13.1262	14.3303	17.4154	17.2008	21.4005	23.9069	22.5356	20.2021
XLOC_004499	NT5C2	chr10:104669840-104954447	-0.584166	0.00151612	0.0228744	UP	-0.588405	0.00115759	0.0187213	UP	16.4209	18.1917	12.9513	14.1276	9.21329	9.54268	10.769	11.6748	9.9179	10.739	10.5322	10.0191
XLOC_004582	TCERG1L	chr10:132890651-133111964	1.02233	5.49788e-07	4.01176e-05	DOWN	1.09684	2.59437e-07	2.102e-05	DOWN	1.31513	1.24536	1.04587	1.02319	2.06083	2.21263	2.5558	2.49787	2.33797	2.49278	2.48588	2.52142
XLOC_004627	LOC100507127	chr10:6821559-6885035	-0.879653	1.0444e-08	1.27991e-06	UP	-1.82968	0	0	UP	2.88518	3.52732	2.53434	3.70617	1.69417	1.55699	1.69491	1.9308	0.841343	0.910502	0.95411	0.853652
XLOC_005174	PKP3	chr11:394016-404908	-1.20184	2.78311e-09	3.99487e-07	UP	-1.12441	3.27898e-07	2.5713e-05	UP	3.71247	3.76783	2.93088	2.90537	1.14033	1.23362	1.66765	1.66233	1.45421	1.54765	1.45958	1.56679
XLOC_005188	TSPAN4	chr11:842823-915058	-0.961926	9.08353e-07	6.23861e-05	UP	-0.647862	0.000946127	0.0161405	UP	27.1302	28.5113	22.7261	23.6756	12.3647	12.0293	14.1098	13.6559	15.1891	17.787	16.0383	15.5957
XLOC_005213	CD81,TSSC4	chr11:2356967-2425458	-0.701567	3.67522e-06	0.000202335	UP	-0.438582	0.00256629	0.0335404	UP	145.115	156.252	123.371	128.894	80.9572	78.7612	92.8463	86.6003	99.1034	112.608	99.3858	95.4152
XLOC_005379	EIF3M	chr11:32605312-32827537	-0.508322	0.000262913	0.0061462	UP	-0.442712	0.00106724	0.017663	UP	120.45	124.256	92.902	94.8211	66.4622	71.4131	76.4549	88.3221	79.7109	85.3708	77.8088	75.8285
XLOC_005408	HSD17B12	chr11:43702085-43888836	-0.490496	0.000629366	0.011892	UP	-0.549761	7.6188e-05	0.00238529	UP	68.9492	80.021	63.9471	68.47	48.7923	47.9287	50.5522	53.8969	44.0029	52.8305	49.1595	46.8849
XLOC_005409	ALKBH3	chr11:43902131-43947672	-0.663081	0.00137912	0.0212914	UP	-0.641027	0.00388669	0.0451566	UP	4.86749	5.03727	3.95844	4.1315	2.58179	2.71373	2.78435	3.10821	3.07229	3.1594	2.62982	2.68938
XLOC_005423	CREB3L1	chr11:46299227-46342972	-1.16048	7.96363e-10	1.29551e-07	UP	-0.599563	0.00122342	0.0195498	UP	5.74516	6.12051	4.69458	4.97834	2.17027	2.31559	2.46122	2.56595	3.26886	4.0161	3.43577	3.31358
XLOC_005483	RTN4RL2	chr11:57228338-57244384	-1.03704	1.11331e-09	1.74278e-07	UP	-0.738328	3.53066e-05	0.00127303	UP	11.5336	11.5818	9.3958	9.19514	4.45546	5.28572	5.68097	5.07073	6.11389	6.86952	6.08523	5.76366
XLOC_005523	CCDC86	chr11:60609428-60623444	-0.644756	5.75487e-06	0.000294727	UP	-0.607721	2.39998e-05	0.00094145	UP	27.7376	26.1479	19.6552	19.938	13.3744	12.9545	15.232	16.3127	15.8175	15.6852	14.3885	14.3802
XLOC_005543	DAGLA	chr11:61447904-61514550	-0.649265	6.84004e-05	0.0021877	UP	-0.564181	0.000607704	0.0116196	UP	4.33819	4.18766	3.7238	3.74161	2.51208	2.44076	2.65195	2.54157	2.74418	2.76557	2.66733	2.54854
XLOC_005562	SLC3A2	chr11:62619459-62656355	-0.855174	8.91693e-06	0.000420581	UP	-0.533583	0.00281134	0.0358343	UP	216.095	252.504	188.753	233.201	120.894	115.452	129.146	123.647	144.88	169.481	146.81	151.981
XLOC_005594	SLC22A20	chr11:64980775-65010696	-1.14256	5.7556e-05	0.00190398	UP	-0.935054	0.00208219	0.0287966	UP	1.65166	1.69501	1.58312	1.64324	0.693459	0.754844	0.747119	0.778365	0.754751	0.892564	0.895365	0.889081
XLOC_005623	ACTN3	chr11:66301509-66330797	-0.832497	1.3755e-07	1.20507e-05	UP	-0.982732	1.31697e-09	2.02716e-07	UP	20.0391	19.8167	17.1321	17.2997	9.36821	9.96001	10.479	11.0609	8.14233	9.04592	10.1165	9.61154
XLOC_005627	LRFN4	chr11:66615996-66725994	-0.803181	7.77081e-06	0.000376411	UP	-0.513369	0.00385622	0.0449158	UP	18.7346	18.7021	17.4907	17.0514	9.86223	9.65829	10.9435	10.5737	11.6139	13.1487	12.3534	12.7433
XLOC_005648	LRP5	chr11:68079959-68216779	-0.608061	5.9326e-06	0.000301966	UP	-0.384303	0.00436012	0.0489502	UP	13.5582	14.1523	12.9858	12.4995	8.61451	8.18771	9.11675	8.66093	9.74859	10.6843	9.8137	10.0124
XLOC_005650	GAL	chr11:68450368-68459169	-0.932461	2.74063e-11	6.01532e-09	UP	-1.11941	6.66134e-15	2.63174e-12	UP	90.1017	102.527	68.4345	82.1608	40.7523	38.9899	48.5427	50.0481	37.49	43.7522	40.2034	34.7824
XLOC_005661	CTTN	chr11:70238901-70284679	-0.442582	0.0029692	0.0372119	UP	-0.425483	0.00308054	0.0381861	UP	55.9867	56.556	44.5719	47.1027	35.239	34.9476	38.8254	40.3639	37.947	39.8855	36.722	36.9171
XLOC_005699	SERPINH1	chr11:75271426-75291894	-0.513533	0.000612929	0.0116826	UP	-0.472596	0.000807155	0.0143305	UP	213.016	236.108	185.013	203.418	147.928	139.249	151.114	143.813	144.902	167.078	142.228	144.725
XLOC_005799	LAYN	chr11:111407903-111434184	-1.54787	9.05498e-13	2.63598e-10	UP	-1.36296	5.44768e-09	7.17416e-07	UP	3.51251	4.10612	3.1141	3.1777	0.885906	1.13447	1.27799	1.41868	1.25278	1.5685	1.52107	1.05032
XLOC_005802	C11orf52,HSPB2,HSPB2-C11orf52	chr11:111779349-111797595	-1.23215	0.000225148	0.00546668	UP	-1.44657	0.000153992	0.00411337	UP	2.74387	2.77932	2.22913	2.08328	0.904519	0.949711	1.22015	1.08401	0.74795	1.14124	0.873558	0.81992
XLOC_005822	PAFAH1B2,SIDT2,TAGLN	chr11:117014226-117186972	-1.01494	3.54815e-05	0.00127712	UP	-0.802932	0.000476496	0.00963985	UP	159.642	166.514	112.066	128.785	60.9012	63.307	69.9372	82.3098	79.6424	84.0985	79.3661	78.149
XLOC_005840	MIR3656,TRAPPC4	chr11:118889240-118894385	-0.495163	0.000538539	0.0105982	UP	-0.68802	2.69012e-06	0.000155967	UP	40.862	41.8292	31.1278	30.8941	23.5373	23.455	26.2078	29.12	23.1155	23.5734	21.8412	21.1163
XLOC_005887	EI24	chr11:125439297-125455055	-0.530785	0.000131919	0.00366658	UP	-0.408751	0.00238529	0.0317959	UP	72.5694	73.8506	55.7232	54.896	38.5415	42.6058	47.7488	50.1649	48.5801	53.469	47.019	45.3416
XLOC_005912	ST14	chr11:130029681-130080257	-0.851307	1.33315e-09	2.04826e-07	UP	-0.797553	2.2944e-08	2.5381e-06	UP	15.3273	16.8594	11.0663	14.5363	7.05892	7.59022	8.85462	8.28093	7.73254	9.29266	7.85054	8.04222
XLOC_005930	IFITM3	chr11:319672-320914	-0.507087	0.000186474	0.00470103	UP	-0.52438	8.63797e-05	0.00261745	UP	216.702	217.809	161.751	161.955	123.609	121.926	137.961	149.318	126.388	136.905	136.059	125.85
XLOC_005957	CTSD	chr11:1490684-1785501	-0.819247	1.12152e-08	1.35598e-06	UP	-0.404642	0.00326496	0.0398237	UP	110.788	121.247	107.279	109.96	63.7071	58.8616	68.2891	62.1136	76.7677	91.0066	83.5816	85.3211
XLOC_005986	ZNF195	chr11:3365500-3400457	-0.511065	0.000750568	0.0135934	UP	-0.555354	0.000176562	0.0045198	UP	22.8093	24.89	20.6928	21.9699	14.9192	14.901	16.456	17.2125	14.7715	16.0743	15.6312	15.2415
XLOC_006085	GALNTL4	chr11:11292420-11643598	-0.912541	1.07967e-05	0.000489219	UP	-0.619691	0.00264594	0.0343058	UP	5.01034	5.27772	4.25954	4.63151	2.17403	2.4209	2.5441	2.912	3.12557	3.19559	3.07084	3.01109
XLOC_006088	DKK3	chr11:11862718-12030917	-0.743035	7.5335e-05	0.0023627	UP	-0.665309	0.000464078	0.00945779	UP	12.9134	14.2499	11.4283	11.0172	6.79112	7.07029	7.90796	7.77728	7.33328	8.40009	8.27867	7.15185
XLOC_006108	SAAL1	chr11:18078341-18127670	-0.552433	0.000210816	0.00517932	UP	-0.508214	0.000858613	0.0150033	UP	21.746	24.1682	17.5599	17.8888	12.5863	13.131	14.4626	15.254	13.9547	15.5578	14.0896	13.6509
XLOC_006139	MPPED2	chr11:30406039-30608779	-0.83575	0.000881418	0.0153108	UP	-0.785668	0.00325267	0.0396913	UP	2.84479	2.84437	1.99834	2.27536	1.38095	1.34917	1.45636	1.46484	1.45039	1.46242	1.47859	1.44451
XLOC_006168	TP53I11	chr11:44748379-44972608	-1.29355	0	0	UP	-0.656089	1.35097e-05	0.000591789	UP	27.3297	26.5676	26.414	21.3537	9.0882	9.68887	11.5216	11.0364	15.3337	16.2929	17.1306	15.3397
XLOC_006169	SYT13	chr11:45261852-45307884	-0.586022	6.59873e-05	0.00212198	UP	-0.686165	6.52367e-06	0.000327035	UP	6.00538	6.2796	5.23664	5.02863	3.26484	3.68925	3.76992	4.3031	3.30434	3.73732	3.66272	3.3242
XLOC_006226	SLC43A3	chr11:57174425-57195053	-0.686045	1.62577e-06	0.000101465	UP	-0.508446	0.000422335	0.00881051	UP	19.6817	21.8671	16.6052	18.9005	11.3228	11.247	12.7075	12.5399	13.2064	15.1876	12.9839	12.8076
XLOC_006258	SLC15A3	chr11:60691872-60720034	-1.18997	5.30295e-05	0.00177835	UP	-0.958516	0.00175745	0.0256075	UP	10.7526	11.1869	8.5624	10.8013	4.24738	4.19664	5.02144	4.67351	4.94942	6.13287	5.08435	5.00196
XLOC_006260	VWCE	chr11:61025757-61063916	-1.02833	1.07221e-07	9.67975e-06	UP	-1.03135	5.20556e-07	3.81523e-05	UP	5.36526	5.6496	5.06319	5.9487	2.72857	2.6135	2.75363	2.66956	2.42801	2.69986	2.68998	2.88273
XLOC_006269	FADS3	chr11:61640984-61659749	-0.847702	1.28377e-07	1.13792e-05	UP	-0.609028	0.000161559	0.00425184	UP	18.4337	19.0806	16.3193	16.5831	9.017	9.25681	10.3469	10.2286	10.3489	11.9162	12.08	11.4107
XLOC_006292	PLA2G16	chr11:63341943-63381941	-0.774575	5.91926e-07	4.28158e-05	UP	-1.05404	2.20342e-11	4.88793e-09	UP	52.5761	55.1565	44.8608	42.3365	23.3431	26.4458	29.7783	34.2917	21.4328	24.5242	25.3757	22.5155
XLOC_006314	CDCA5	chr11:64844926-64851615	-0.668368	8.30394e-07	5.75079e-05	UP	-0.396897	0.00295271	0.03705	UP	39.9724	39.2938	29.9073	30.7479	20.5205	20.4301	22.8796	23.6582	27.3935	27.7642	25.388	25.3629
XLOC_006341	CD248	chr11:66081957-66084515	-1.17522	1.19417e-08	1.4338e-06	UP	-0.848874	0.000112584	0.00322871	UP	1.91224	2.15639	1.76151	2.08807	0.977986	0.788533	0.856351	0.866755	1.02013	1.23969	0.97137	1.11635
XLOC_006373	C11orf24	chr11:68017850-68041377	-0.740068	1.39692e-06	8.92204e-05	UP	-0.515832	0.000937692	0.0160273	UP	15.8041	15.3679	13.4522	13.238	8.08193	7.87047	8.9451	9.42667	9.93365	10.5977	9.95908	9.63523
XLOC_006381	FGF19	chr11:69513005-69519106	-0.891438	7.90686e-08	7.46304e-06	UP	-0.805476	4.81226e-06	0.000252373	UP	7.06136	7.51134	5.09921	6.1278	3.27777	3.14649	3.53677	3.93287	3.75358	4.01937	3.70027	3.22179
XLOC_006388	DHCR7	chr11:71145456-71159477	-0.560215	7.33219e-05	0.00231389	UP	-0.401937	0.00287713	0.0363989	UP	66.4109	71.9021	61.8456	67.6229	46.504	41.6611	48.149	44.4933	48.4172	54.7644	48.7465	49.7248
XLOC_006432	ALG8	chr11:77808272-77850699	-0.616186	2.05564e-05	0.000828305	UP	-0.475474	0.00062861	0.0118827	UP	46.8848	55.3057	44.2591	44.9928	29.4131	30.3764	33.074	32.7787	31.328	38.9187	34.5103	33.7842
XLOC_006453	FZD4	chr11:86655565-86666613	-0.704896	2.95739e-06	0.000168403	UP	-0.481383	0.00174577	0.0254954	UP	3.16357	3.58134	3.21148	3.2438	2.00772	1.94703	2.06969	2.08981	2.22441	2.48768	2.486	2.28063
XLOC_006492	DCUN1D5	chr11:102921412-102962944	-0.521518	0.000126472	0.00354368	UP	-0.428049	0.00152466	0.0229741	UP	5.95594	6.23918	4.52559	4.86697	3.4851	3.52932	4.00495	4.27008	4.04122	4.50262	3.79076	3.89332
XLOC_006507	SLC35F2	chr11:107661662-107730363	-0.776743	5.41941e-08	5.42372e-06	UP	-0.498937	0.000511537	0.0101995	UP	13.3861	14.9206	11.4358	11.2475	6.38408	6.9741	8.15484	8.34957	8.50429	9.90978	9.23543	8.50866
XLOC_006569	BCL9L	chr11:118754474-118797412	-0.837565	6.91529e-09	8.85392e-07	UP	-0.46741	0.00077842	0.0139543	UP	16.1503	16.0038	13.2303	13.7091	7.72494	7.76256	9.14147	8.34721	10.1989	11.0255	10.7296	10.4069
XLOC_006576	MCAM	chr11:119179233-119187840	-1.12482	2.24265e-13	6.94268e-11	UP	-0.88322	2.61657e-08	2.85265e-06	UP	7.08955	7.5116	6.76917	6.88113	3.05941	3.07249	3.23745	3.47207	3.63656	3.72637	4.08458	3.7841
XLOC_007415	IQSEC3	chr12:176048-287634	-0.985385	6.66507e-05	0.00214165	UP	-1.14479	3.46551e-05	0.00125425	UP	0.687553	0.597097	0.662998	0.668587	0.318884	0.330598	0.320286	0.353659	0.277984	0.301887	0.301033	0.300814
XLOC_007435	TEAD4	chr12:3066046-3156446	-0.784224	5.91817e-05	0.00194151	UP	-0.766179	8.22173e-05	0.00252278	UP	29.9533	30.4405	19.7493	23.5135	12.6649	13.6117	15.8353	17.2727	15.6238	16.3778	14.1264	14.3199
XLOC_007436	TSPAN9	chr12:3186520-3395972	-0.769126	9.58512e-07	6.53295e-05	UP	-0.485895	0.00210429	0.0290393	UP	9.59176	10.4918	8.28861	8.27945	5.03527	5.0221	5.70275	5.71833	6.40076	7.11792	6.48819	6.05975
XLOC_007447	KCNA1	chr12:5019063-5029047	-0.835379	0.00423748	0.0479628	UP	-0.982983	0.00279955	0.0357321	UP	0.234802	0.26581	0.263285	0.24639	0.130117	0.147914	0.140773	0.147933	0.120189	0.123086	0.137376	0.131156
XLOC_007539	MGST1	chr12:16500075-16530127	-0.6163	1.4786e-05	0.000635943	UP	-0.391619	0.00411916	0.0469953	UP	247.192	273.184	210.641	209.048	134.901	147.256	161.516	176.56	169.503	197.212	187.094	167.351
XLOC_007625	WNT1	chr12:49372075-49376402	2.2199	6.53594e-05	0.00210668	DOWN	2.57847	4.26429e-06	0.000228981	DOWN	0.0575608	0.0256225	0.164519	0.0366705	0.245152	0.548165	0.34204	0.194923	0.501649	0.267724	0.377111	0.514387
XLOC_007664	C12orf44	chr12:52463242-52481440	-0.63746	0.00010325	0.00302053	UP	-0.534651	0.00133549	0.0208686	UP	24.2978	24.5693	17.4559	19.1021	12.2061	12.6077	14.6201	14.7709	14.5835	15.8888	13.9671	14.078
XLOC_007736	NAB2	chr12:57482676-57506149	-0.774799	8.62288e-06	0.00040974	UP	-0.632258	0.00025072	0.00593752	UP	12.6761	12.0312	12.1847	10.3426	6.15442	6.7799	7.06803	7.2335	7.28025	7.38287	7.80661	7.71113
XLOC_007808	MYF5,MYF6	chr12:81101407-81127619	-2.1718	0	0	UP	-2.58577	4.03944e-05	0.00142127	UP	0.551935	0.593709	0.575279	0.715438	0.117617	0.119947	0.161233	0.143845	0.0853456	0.123128	0.104316	0.113055
XLOC_007820	TMTC3	chr12:88536072-88593664	-0.561628	3.16459e-05	0.00117526	UP	-0.42633	0.00130554	0.0205649	UP	12.9404	15.2323	11.9807	13.2247	8.35181	8.86823	9.27005	10.0095	9.07422	10.8156	10.2933	9.90967
XLOC_007866	ASCL1	chr12:103351451-103354294	1.96691	1.41238e-05	0.000612223	DOWN	2.61601	1.12282e-08	1.35598e-06	DOWN	0.0379456	0.025114	0.0581286	0.0357611	0.214629	0.175822	0.11143	0.0993731	0.262531	0.215688	0.265318	0.213083
XLOC_007884	PWP1	chr12:108078090-108107949	-0.504447	0.000757624	0.0136943	UP	-0.440338	0.00338097	0.0408305	UP	29.7385	30.6159	22.6795	23.2872	16.0575	17.2684	19.412	21.4818	19.9183	20.8501	19.498	18.3283
XLOC_007901	ATP2A2	chr12:110703773-110789492	-0.64102	0.000346545	0.00757757	UP	-0.478062	0.00406532	0.046554	UP	92.945	106.565	88.0478	92.0262	57.0002	58.9606	64.603	62.8123	62.3535	73.8878	69.1078	67.1478
XLOC_007921	TPCN1	chr12:113659259-113736389	-0.621563	1.0331e-05	0.000471723	UP	-0.49519	0.000329203	0.00729115	UP	9.40688	9.86681	8.79981	8.95368	6.04558	5.70331	6.18601	6.03381	6.23924	6.7099	6.63829	6.57698
XLOC_007955	ORAI1	chr12:122063835-122082190	-0.84134	2.41545e-06	0.000142027	UP	-0.524187	0.00413995	0.0471482	UP	13.4978	13.4381	10.5809	10.2908	5.98859	6.15223	7.16039	7.42859	8.27506	9.14921	8.13807	7.4675
XLOC_007973	TMED2	chr12:124064747-124084716	-0.645005	4.62684e-06	0.000244815	UP	-0.629396	3.41611e-06	0.000190343	UP	109.442	117.36	84.2763	82.5056	54.4455	58.9199	67.7741	73.9283	64.7992	71.32	63.39	56.6778
XLOC_007979	BRI3BP	chr12:125478111-125537863	-0.708323	0.00447571	0.0497964	UP	-0.887803	0.00066434	0.0123804	UP	8.34669	8.9399	6.73735	6.72071	4.27443	4.42386	5.16995	4.97543	3.92635	4.59359	4.16729	3.84139
XLOC_007980	AACS	chr12:125549629-125627875	-0.49102	0.000875966	0.0152359	UP	-0.702686	2.65358e-06	0.000154064	UP	16.426	16.22	12.8035	13.0256	9.65912	9.45852	10.8174	11.3823	8.53052	9.65719	9.03455	8.49731
XLOC_007987	TMEM132C	chr12:128751947-129192460	1.15165	3.98247e-06	0.000216378	DOWN	1.07633	7.68994e-05	0.00240212	DOWN	0.12759	0.156004	0.298373	0.119315	0.53192	0.374096	0.297988	0.368693	0.470869	0.276753	0.405047	0.338946
XLOC_007990	FZD10	chr12:130646967-130650372	1.58446	4.29612e-09	5.82404e-07	DOWN	1.52171	9.56321e-08	8.73812e-06	DOWN	0.237064	0.286935	0.3461	0.176327	0.975288	0.719819	0.72853	0.669503	0.848618	0.654873	0.731805	0.728618
XLOC_008014	ZNF268	chr12:133757979-133787891	-0.584434	0.000108532	0.00313418	UP	-0.467496	0.00201749	0.0282122	UP	7.67461	8.55185	6.6809	7.21991	4.94802	4.71717	5.20316	5.34142	5.16027	5.85184	5.37477	5.52931
XLOC_008059	LPCAT3	chr12:7085346-7125842	-0.749581	3.91027e-08	4.07826e-06	UP	-0.410121	0.00240825	0.0320248	UP	30.5192	33.9005	27.1883	27.3944	16.2518	16.5926	19.5327	18.5256	21.7349	24.6078	22.1171	21.1063
XLOC_008101	CSDA	chr12:10851675-10875953	-0.5196	0.000219654	0.00536469	UP	-0.466993	0.000603606	0.0115719	UP	108.863	111.644	78.9603	87.5101	61.5487	62.3714	71.126	72.2433	69.7866	77.112	65.1527	65.8239
XLOC_008157	ST8SIA1	chr12:22346324-22488242	0.668289	0.0021032	0.0290311	DOWN	0.669669	0.00353407	0.0421517	DOWN	0.472565	0.455996	0.457191	0.463432	0.818645	0.767493	0.680413	0.67828	0.759547	0.716867	0.735963	0.740024
XLOC_008170	ITPR2	chr12:26486984-26986260	-0.465953	0.000636469	0.011993	UP	-0.574949	2.22051e-05	0.000882313	UP	6.84514	7.97603	5.28739	6.82349	4.52554	4.69906	4.8395	5.45815	4.26212	4.96132	4.43853	4.49379
XLOC_008183	TMTC1	chr12:29653554-29937745	-0.967785	6.86406e-12	1.69489e-09	UP	-0.846196	3.49457e-09	4.85645e-07	UP	7.19596	7.66843	5.6906	6.1755	2.90184	3.39259	3.67178	3.85174	3.45599	4.01122	3.96649	3.5519
XLOC_008197	PKP2	chr12:32943679-33049780	-1.10136	5.30465e-12	1.32634e-09	UP	-0.827019	6.0791e-07	4.37432e-05	UP	7.88571	9.30505	5.56757	7.05393	2.97567	3.22684	3.6837	3.96055	4.08614	4.52625	4.29182	3.87658
XLOC_008206	PRICKLE1	chr12:42851616-42983572	-1.45988	0	0	UP	-0.914219	2.05559e-10	3.78987e-08	UP	24.1016	24.484	16.1744	18.6989	6.96746	7.08832	8.03543	8.20513	11.7379	12.1979	10.2011	10.2101
XLOC_008210	NELL2	chr12:44902057-45307711	-0.75558	4.09559e-08	4.25275e-06	UP	-0.491736	0.000515097	0.0102582	UP	34.1332	38.4637	31.8541	31.7664	17.8378	19.7364	20.5757	22.6171	22.4359	25.5619	25.0269	24.0113
XLOC_008239	CCNT1	chr12:49082056-49110939	-0.535934	0.000405231	0.00856134	UP	-0.44984	0.00367466	0.0432995	UP	12.7574	12.3915	10.6555	10.3142	7.80147	7.54948	8.11547	8.70183	8.41254	8.79422	8.59176	8.30843
XLOC_008244	WNT10B	chr12:49359122-49366740	0.88935	0.000197295	0.00490819	DOWN	0.892962	0.000445638	0.00919162	DOWN	0.944711	0.763342	1.57952	0.80811	1.81812	1.9835	1.97802	1.77267	1.72842	1.81417	1.90233	2.11573
XLOC_008367	LRIG3	chr12:59257510-59314698	-0.685474	3.82694e-05	0.00136268	UP	-0.518889	0.00258365	0.0337037	UP	4.03109	4.64035	4.37093	4.22471	2.58953	2.54599	2.8277	2.76407	2.89492	3.15402	3.13978	2.95092
XLOC_008380	WIF1	chr12:65444389-65515358	-0.822392	0.000312041	0.00700748	UP	-0.967054	0.000118956	0.00336376	UP	4.11106	4.62088	2.58167	4.50614	1.94434	2.22285	2.4487	2.38505	1.96367	2.2882	1.94713	1.88161
XLOC_008448	DUSP6	chr12:89741836-89746296	0.973083	4.6243e-12	1.17687e-09	DOWN	0.588541	2.64325e-05	0.00101754	DOWN	15.4157	15.6804	11.8977	11.9318	27.723	25.8232	26.2951	28.0727	22.0764	22.6109	17.4549	20.3098
XLOC_008492	PAH	chr12:103232080-103311448	-0.885099	0.00015212	0.0040778	UP	-1.40656	2.86398e-07	2.28694e-05	UP	3.29786	3.57105	2.67065	3.272	1.65594	1.55363	1.90303	1.84055	1.06721	1.32786	1.41033	1.0506
XLOC_008502	NUAK1	chr12:106457124-106533811	-0.854286	3.28299e-09	4.5932e-07	UP	-0.618064	2.49348e-05	0.000971697	UP	5.53231	5.59463	4.23513	4.54257	2.5862	2.58403	2.7089	3.11947	3.19015	3.36159	3.27143	3.13481
XLOC_008503	CKAP4	chr12:106631658-106641713	-0.694648	3.54801e-07	2.74083e-05	UP	-0.631756	1.81965e-06	0.000111499	UP	57.4727	63.468	56.0979	54.7131	34.2447	33.9303	37.0428	36.7764	34.9956	40.2832	37.0378	36.9519
XLOC_008620	SCARB1	chr12:125262173-125348519	-0.577555	7.68437e-05	0.00240212	UP	-0.492141	0.000925951	0.0158822	UP	21.1379	21.7989	17.7138	19.6144	13.3668	12.3995	14.2565	13.5781	13.9867	15.5175	13.3073	13.8822
XLOC_008622	DHX37	chr12:125431369-125473667	-0.642412	3.03179e-06	0.000172403	UP	-0.533255	0.000109614	0.00316211	UP	13.9646	13.7211	10.5204	11.3524	7.36128	6.9451	8.57474	8.34821	8.8464	8.96913	7.84323	8.27585
XLOC_008647	ZNF605	chr12:133498018-133533584	-0.449706	0.00218242	0.0297514	UP	-0.570831	0.000229301	0.00554227	UP	6.33016	7.2595	6.5519	6.55813	4.76536	4.63277	5.088	5.13421	4.07791	4.73903	4.65076	4.60437
XLOC_009561	SPATA13	chr13:24734860-24881212	-0.508491	0.000192838	0.00481898	UP	-0.434897	0.00132107	0.0207352	UP	7.9706	7.98873	6.5276	6.7197	5.00241	4.81416	5.24847	5.35697	5.58353	5.59202	5.12952	5.28827
XLOC_009570	PABPC3	chr13:25670275-25672704	-3.87714	0	0	UP	-4.12716	0	0	UP	10.8092	11.4446	9.26713	9.69052	0.662925	0.681256	0.748203	0.715246	0.611203	0.615751	0.535856	0.603004
XLOC_009601	BRCA2	chr13:32887758-33004972	-0.455308	0.00198962	0.0279213	UP	-0.432393	0.00289786	0.0365876	UP	7.27624	7.98453	7.02624	6.96209	5.01952	5.15695	5.43358	5.8299	5.08928	5.64335	5.57976	5.51273
XLOC_009628	EPSTI1	chr13:43374107-43566377	-0.521318	0.00149353	0.0226323	UP	-0.467381	0.00270773	0.0348456	UP	17.2801	18.6393	14.6579	18.903	12.5825	11.2511	11.931	12.7296	12.0717	13.3777	12.2844	12.7497
XLOC_009629	DNAJC15	chr13:43597235-43688312	-0.556017	0.00141008	0.0216431	UP	-0.522055	0.00412975	0.0470644	UP	4.67106	5.06373	4.14629	3.65083	2.68069	2.74479	3.09097	3.5035	3.0776	3.28167	3.09998	2.83162
XLOC_009643	ITM2B	chr13:48807273-48836232	-0.790168	9.64181e-09	1.18707e-06	UP	-0.455215	0.000684316	0.0126391	UP	79.0674	90.5905	74.9984	73.214	40.8199	44.4429	48.9676	50.6601	51.775	63.7988	62.4699	55.2516
XLOC_009644	RB1	chr13:48877139-49056258	0.585886	0.000404934	0.0085605	DOWN	0.66099	7.53526e-05	0.0023627	DOWN	3.18375	3.37763	2.87856	2.58578	4.16081	4.48303	4.47344	5.07041	4.8217	4.8352	4.71933	4.76982
XLOC_009690	KLF5	chr13:73633141-73651826	-1.44919	0.00318334	0.0390983	UP	-1.01991	0.00128935	0.0203835	UP	0.833166	1.00792	0.888272	0.732596	0.308762	0.260684	0.333	0.362887	0.420564	0.465856	0.414917	0.396239
XLOC_009723	TM9SF2	chr13:100144485-100219478	-0.649099	1.97124e-05	0.000802087	UP	-0.484785	0.000915501	0.0157519	UP	80.4043	98.2675	78.79	83.5815	50.9823	52.1802	57.6765	57.4063	54.9661	67.4918	61.9591	60.3069
XLOC_009744	SOX1	chr13:112721912-112726020	2.2607	6.66134e-16	3.1224e-13	DOWN	2.71999	0	0	DOWN	0.108803	0.0578848	0.184457	0.0686253	0.648597	0.540953	0.459765	0.330593	0.816672	0.563274	0.64894	0.700493
XLOC_009764	CDC16	chr13:115000148-115042567	-0.504475	0.000486045	0.00978949	UP	-0.404048	0.00439052	0.0491784	UP	31.6026	33.0346	23.4467	25.6524	18.0014	18.9905	20.9073	22.1943	21.4238	23.2448	21.3335	20.2121
XLOC_009782	SKA3	chr13:21725538-21753220	-0.55183	0.00288564	0.0364724	UP	-0.641034	0.000569863	0.011075	UP	20.3653	21.4227	14.5987	16.7683	11.2286	11.6499	12.926	14.451	12.091	12.7336	11.1178	11.2033
XLOC_009817	SLC7A1	chr13:30083550-30169825	-0.86495	3.17293e-09	4.46178e-07	UP	-0.560555	5.10888e-05	0.00172372	UP	54.7625	61.6954	50.6065	55.2649	29.0806	29.268	32.5755	31.157	35.7558	41.5118	36.9561	36.2623
XLOC_009835	CCDC169,CCDC169-SOHLH2,SOHLH2	chr13:36742339-36875544	-0.713905	0.00182896	0.026303	UP	-0.829733	0.000326199	0.00725172	UP	11.2383	13.5719	10.1888	11.6186	6.45614	6.55024	7.33867	8.0252	5.78617	6.87268	7.11973	6.53574
XLOC_009836	SPG20	chr13:36875774-36947667	-0.628318	2.64478e-05	0.00101754	UP	-0.685983	4.68482e-06	0.00024741	UP	14.4762	16.241	11.4711	12.4468	7.79351	8.19343	8.71191	10.8884	8.25165	9.10977	8.70712	8.16491
XLOC_009838	ALG5	chr13:37523907-37573504	-0.755682	8.84491e-06	0.000417897	UP	-0.575882	0.00113194	0.0184722	UP	15.1382	16.7893	12.9934	13.5282	7.66794	8.11327	8.96747	9.70088	9.27021	10.8638	9.86795	9.28784
XLOC_009878	LCP1	chr13:46700057-46756459	-1.5616	5.60672e-11	1.1717e-08	UP	-1.6041	2.26418e-09	3.30141e-07	UP	1.00272	1.13163	0.54234	0.852616	0.237441	0.277805	0.315381	0.35141	0.288089	0.33218	0.245319	0.297106
XLOC_009890	EBPL	chr13:50226827-50266364	-0.619365	9.76734e-06	0.000451704	UP	-0.461158	0.0010012	0.0168047	UP	64.1511	70.5243	52.3575	53.2806	34.3847	37.3933	40.3051	45.1549	41.3606	48.0202	43.6946	41.7618
XLOC_009940	FBXL3	chr13:77565780-77603193	-0.956252	2.64191e-06	0.000153493	UP	-0.62439	0.00232075	0.0311156	UP	5.42893	5.37914	4.58631	4.24773	2.39448	2.46706	2.54589	2.82663	3.12422	3.07133	3.38162	3.2773
XLOC_009947	EDNRB	chr13:78469615-78549869	-0.852112	2.9792e-06	0.000169528	UP	-0.609946	0.000977547	0.0165348	UP	7.33329	7.523	9.8504	7.16413	4.68672	4.10955	4.38994	4.42978	4.78045	5.57987	5.16135	5.40744
XLOC_009967	SLC15A1	chr13:99336054-99404929	-0.720793	0.000755633	0.0136643	UP	-0.76292	0.00136321	0.0211481	UP	1.04666	1.26689	0.885058	1.13169	0.612357	0.680896	0.651849	0.684869	0.586229	0.648085	0.660475	0.659733
XLOC_009998	RAB20	chr13:111175412-111214071	-1.06707	2.02858e-08	2.27436e-06	UP	-1.10958	1.14068e-07	1.02422e-05	UP	5.78839	5.67073	4.15035	4.44965	1.87815	2.1753	2.53962	2.81279	2.29225	2.40681	2.19232	2.31593
XLOC_010616	PNP	chr14:20937324-20950153	-0.522013	0.000289334	0.00660746	UP	-0.600886	3.90695e-05	0.00138457	UP	21.0443	21.7413	15.5622	16.5217	11.5594	12.3104	13.3593	14.8812	12.6989	13.3819	11.7099	11.7331
XLOC_010640	MMP14,MRPL52	chr14:23298748-23316948	-0.630485	0.000469872	0.00954539	UP	-0.562945	0.00134132	0.0209142	UP	61.5253	63.9239	50.5321	53.9489	35.6549	34.7026	37.7656	39.3101	38.4864	42.1721	37.2013	37.0788
XLOC_010711	MGAT2	chr14:50087488-50090199	-0.732032	3.45226e-07	2.68183e-05	UP	-0.480673	0.000953735	0.0162313	UP	13.1947	14.6532	11.8369	11.6238	7.26025	7.39018	8.01421	8.32007	8.71457	10.0111	9.12468	8.92348
XLOC_010734	SAMD4A	chr14:55030823-55260176	-1.17453	5.59659e-10	9.32383e-08	UP	-1.26723	2.08628e-10	3.83792e-08	UP	2.75036	2.84602	1.98657	2.9188	1.09193	1.14769	1.13195	1.28139	1.09529	1.0379	1.11121	1.10823
XLOC_010773	AKAP5,MTHFD1	chr14:64808463-64941920	-0.643732	1.98963e-05	0.000805229	UP	-0.580424	5.57329e-05	0.00185031	UP	77.3265	79.6924	56.1739	61.1565	39.6009	40.9286	44.9399	48.4508	47.7683	49.8891	42.7834	42.7413
XLOC_010775	HSPA2,PPP1R36	chr14:65007185-65056180	-0.898194	1.84163e-09	2.75856e-07	UP	-1.23632	3.77476e-15	1.54274e-12	UP	17.9201	18.5722	11.7981	14.1567	6.75098	7.77306	8.61387	9.82249	6.14632	7.28392	6.79982	6.04989
XLOC_010854	SLIRP	chr14:78174424-78183941	-0.48851	0.000466341	0.00949226	UP	-0.420184	0.00279963	0.0357321	UP	203.11	213.892	154.251	160.441	114.19	117.831	132.988	153.228	136.126	151.021	131.246	127
XLOC_011042	TRMT61A	chr14:103989312-104003410	-0.78209	3.61228e-06	0.000199798	UP	-0.58845	0.000765147	0.0137853	UP	6.81183	6.32959	4.70974	4.90367	3.1704	2.9594	3.56075	3.46035	3.92469	3.86461	3.51231	3.67907
XLOC_011149	EGLN3	chr14:34393420-34420284	-1.15865	4.08562e-14	1.41237e-11	UP	-0.740341	2.19593e-06	0.000130414	UP	9.57075	9.98651	8.46391	7.82134	3.45486	3.89894	4.30022	4.53707	5.22307	5.4141	5.51465	5.37549
XLOC_011179	KLHL28	chr14:45393345-45543664	-0.571142	0.00345248	0.0414447	UP	-0.623834	0.00188984	0.0268526	UP	2.47746	2.65658	2.31948	2.32665	1.58465	1.67617	1.63039	1.76756	1.48254	1.52159	1.68724	1.71969
XLOC_011212	BMP4	chr14:54416454-54423554	-1.53315	1.34446e-08	1.58895e-06	UP	-1.29107	9.36237e-06	0.000437364	UP	2.48568	2.98945	2.28936	2.26492	0.819475	0.829071	0.820492	0.97828	0.989448	1.08266	1.12089	0.883238
XLOC_011213	CNIH	chr14:54887980-54908500	-0.629054	0.000252131	0.00596304	UP	-0.516973	0.00238134	0.0317535	UP	43.4644	49.5001	38.2286	37.4482	24.2434	26.645	28.4633	31.4072	28.073	32.1435	30.3319	28.3847
XLOC_011240	SIX4	chr14:61176082-61192159	-0.71385	9.53346e-06	0.000443111	UP	-0.550605	0.000775465	0.0139228	UP	8.30101	8.99178	7.29969	7.527	4.43536	4.73434	5.02822	5.55905	5.20678	5.71381	5.52244	5.60521
XLOC_011242	TMEM30B	chr14:61744088-61748530	-0.697646	8.9708e-06	0.000421874	UP	-0.614135	0.000181734	0.00461728	UP	4.11165	4.68999	3.172	3.75922	1.97197	2.26366	2.60884	2.94945	2.33012	2.9758	2.62449	2.4018
XLOC_011333	SPTLC2	chr14:77972339-78083110	-0.470114	0.000507896	0.0101453	UP	-0.425002	0.00134439	0.020958	UP	13.2732	14.5269	11.4141	11.347	8.20938	8.78238	9.5076	10.1553	8.94334	10.182	9.89947	8.84222
XLOC_011354	CCDC88C	chr14:91737456-91886217	-0.704241	2.52177e-07	2.04917e-05	UP	-0.625552	2.81222e-06	0.000161132	UP	15.7094	16.6903	15.1611	14.2802	8.70667	8.66594	9.80674	10.1854	9.61966	10.2734	9.90328	9.96784
XLOC_011358	FBLN5	chr14:92335709-92414315	-0.828614	0.00324025	0.0395688	UP	-1.05599	0.000916995	0.015771	UP	0.741193	0.856618	0.537835	0.765182	0.424114	0.337589	0.402328	0.466925	0.324244	0.395009	0.332436	0.344966
XLOC_011368	ASB2	chr14:94400498-94443076	-0.879924	0.000794266	0.0141562	UP	-0.825166	0.00448752	0.049901	UP	1.28808	1.30451	1.2191	1.16007	0.580439	0.681481	0.712232	0.704259	0.64612	0.774884	0.793238	0.573197
XLOC_011370	DDX24	chr14:94492575-94547558	-0.505604	0.000329573	0.00729546	UP	-0.451693	0.000988608	0.0166528	UP	46.97	47.7433	36.381	37.0543	26.7505	27.1465	30.5242	31.7999	30.4992	32.7178	29.3557	29.9171
XLOC_011385	TCL1A	chr14:96176303-96180533	-0.944611	0.00221146	0.0300484	UP	-2.9617	3.78394e-09	5.19806e-07	UP	1.98153	1.84649	1.50055	1.35289	0.653126	0.698209	0.91779	1.20395	0.14109	0.245028	0.256565	0.214743
XLOC_011391	BCL11B	chr14:99634273-99738997	-0.632929	0.00207677	0.0287648	UP	-0.951705	2.82846e-05	0.00107007	UP	0.941662	1.01426	0.809877	0.895335	0.56592	0.53978	0.610074	0.64933	0.415518	0.483283	0.482299	0.515997
XLOC_011410	CKB	chr14:103985994-103989196	-0.760398	7.83464e-08	7.41173e-06	UP	-0.54839	6.01123e-05	0.00196737	UP	162.994	164.666	139.41	133.153	83.103	80.4042	93.7413	92.0462	96.8305	105.727	103.972	99.0905
XLOC_012002	IPW	chr15:25361691-25367623	-0.609711	7.18197e-06	0.000353206	UP	-0.461941	0.00046596	0.00948917	UP	32.0868	36.4274	29.0111	33.9024	21.8988	20.5929	22.1054	22.0818	22.0543	25.189	24.9522	24.1553
XLOC_012003	PAR1	chr15:25377034-25383897	0.914791	4.29622e-06	0.00023011	DOWN	0.821663	0.000446357	0.00920291	DOWN	0.325471	0.348126	0.338578	0.351648	0.635723	0.604349	0.664849	0.634052	0.582209	0.537657	0.635895	0.628314
XLOC_012099	EIF2AK4	chr15:40226346-40327797	-0.520126	0.000156854	0.00416968	UP	-0.393812	0.00305701	0.0379796	UP	32.1553	35.0471	23.965	26.6242	17.6833	19.4088	20.7573	23.431	21.5303	24.7219	22.0339	21.2247
XLOC_012122	TYRO3	chr15:41850017-41871536	-0.985472	4.52971e-13	1.36164e-10	UP	-0.445602	0.000786923	0.0140626	UP	35.1491	35.4205	33.9031	29.0495	15.1777	16.0738	17.7549	17.8295	23.1725	25.2292	25.6454	23.2546
XLOC_012147	SORD	chr15:45315018-45370607	-0.526404	0.000209517	0.00515499	UP	-0.501135	0.000341393	0.00748917	UP	35.1925	35.852	24.8911	26.8749	19.4076	19.8356	22.0012	24.0864	22.0618	23.6888	20.8277	20.3732
XLOC_012176	SCG3	chr15:51973549-52013223	-0.532065	9.97394e-05	0.00293647	UP	-0.540249	6.30379e-05	0.0020447	UP	27.31	30.9545	21.2277	24.0798	16.0691	16.8471	18.9404	19.5896	16.8941	20.4484	17.5141	16.5733
XLOC_012203	APH1B	chr15:63569748-63601325	-0.684361	1.79808e-06	0.000110503	UP	-0.443745	0.00237051	0.0316447	UP	8.88221	10.0307	7.33248	7.7892	4.48994	5.26425	5.67267	6.0031	5.79369	6.89977	6.82981	5.71106
XLOC_012254	CD276	chr15:73976137-74008617	-0.653791	3.18663e-06	0.000180096	UP	-0.388689	0.00429833	0.0484664	UP	63.7257	66.2735	57.2643	54.9963	36.5583	37.1001	40.944	38.9052	44.2444	50.3744	44.8915	44.2069
XLOC_012271	SCAMP5	chr15:75287875-75314122	-0.553485	8.54249e-05	0.00259673	UP	-0.650918	7.47233e-06	0.000364034	UP	24.7872	24.7072	18.0815	19.4529	13.5436	13.8903	16.0169	16.0669	14.2811	14.688	13.5445	12.8747
XLOC_012281	C15orf27	chr15:76352280-76497695	0.857018	0.000177294	0.00453432	DOWN	0.944025	5.48306e-05	0.00182864	DOWN	1.35002	1.57514	1.29072	1.1632	2.54711	2.27639	2.42868	2.43656	2.63325	2.92479	2.16634	2.56969
XLOC_012304	TMED3	chr15:79603490-79615189	-0.626831	1.53674e-05	0.000655957	UP	-0.504621	0.000635008	0.0119764	UP	28.6598	28.4547	21.618	20.6637	13.3738	14.5541	17.746	18.3969	16.9086	19.0306	17.4993	16.4162
XLOC_012351	ZSCAN2	chr15:85144231-85167138	-0.680673	0.0019063	0.0270402	UP	-0.707524	0.0017584	0.0256167	UP	13.2101	13.5264	9.60435	10.9929	6.78789	6.76134	7.65129	7.91	7.57336	8.06392	6.23004	7.01003
XLOC_012366	AEN,ISG20	chr15:89163242-89199617	-0.567762	0.000209029	0.00514608	UP	-0.46022	0.00176789	0.0256876	UP	43.681	43.0097	36.5997	33.7042	23.8755	24.7718	27.2488	29.4942	27.6655	29.9793	28.0701	27.8045
XLOC_012367	ACAN	chr15:89346663-89419132	-0.969592	1.17192e-05	0.00052443	UP	-0.875162	0.000143385	0.00390035	UP	0.667867	0.81012	0.674081	0.801643	0.397688	0.347026	0.382027	0.380277	0.360255	0.440651	0.412855	0.393058
XLOC_012381	IQGAP1	chr15:90931384-91046657	-0.767271	2.14293e-07	1.78326e-05	UP	-0.567117	4.90593e-05	0.00166404	UP	57.1284	66.6716	51.6372	57.1058	31.9793	32.5063	34.8815	37.0093	34.7712	43.059	40.0461	39.3282
XLOC_012444	NIPA2	chr15:22889043-23034601	-0.654415	0.000409089	0.00862309	UP	-0.52044	0.00292255	0.0367883	UP	28.4144	30.1475	23.4208	22.7195	15.0234	15.6703	17.6696	18.9119	18.2887	19.7174	18.5947	16.921
XLOC_012449	HERC2P2	chr15:23282154-23378259	0.522089	0.00358799	0.0425573	DOWN	0.75657	1.3988e-05	0.000608169	DOWN	8.44943	8.15184	8.39291	8.90589	14.0282	11.7438	11.9588	11.1483	14.4263	14.1687	14.535	14.3887
XLOC_012493	NOP10	chr15:34633916-34635362	-0.528958	0.000145427	0.00394039	UP	-0.422119	0.00260802	0.0339203	UP	128.778	135.563	100.425	104.9	75.0191	75.1432	85.0253	89.5234	84.9928	98.3248	84.8459	80.9148
XLOC_012500	ACTC1	chr15:35080296-35087927	-0.952725	8.06355e-11	1.59286e-08	UP	-0.877628	5.76356e-09	7.50675e-07	UP	9.60868	11.632	6.35869	8.99102	4.30759	4.2286	4.67108	5.72373	5.21565	5.15278	5.17651	4.44285
XLOC_012510	MEIS2	chr15:37182960-37394211	1.91371	8.29025e-08	7.77185e-06	DOWN	1.48443	8.58447e-05	0.00260791	DOWN	0.333947	0.339892	0.61091	0.220389	1.66515	1.47589	1.33814	1.17937	1.16584	0.954949	0.961404	1.1058
XLOC_012513	FSIP1,GPR176	chr15:39892011-40217216	-1.00868	1.55399e-09	2.35271e-07	UP	-0.706665	1.05751e-05	0.000481278	UP	85.8402	88.9762	55.4405	68.1013	29.8704	34.5636	40.0583	43.6178	44.8319	51.2534	45.2241	41.2566
XLOC_012518	PLCB2	chr15:40580097-40600187	-0.914515	1.47488e-05	0.000634674	UP	-0.727176	0.00128259	0.0203036	UP	1.71881	1.71182	1.43772	1.55607	0.825552	0.777111	0.917054	0.849322	0.904711	1.05307	0.950753	0.942326
XLOC_012607	PRTG	chr15:55903738-56035177	0.526675	0.000415651	0.00870352	DOWN	0.991805	4.52727e-12	1.15572e-09	DOWN	6.73977	5.8089	16.0552	5.62157	13.7218	13.5187	11.5427	10.2052	18.0575	15.5763	16.4481	17.6204
XLOC_012623	ANXA2	chr15:60639349-60690185	-0.980438	1.76745e-11	4.02853e-09	UP	-1.3388	0	0	UP	43.5337	52.3311	35.3835	38.5644	19.5149	18.7728	20.2479	26.9855	16.2063	17.3199	17.2141	16.489
XLOC_012630	RPS27L	chr15:63445538-63449741	-0.534931	0.00018291	0.00463511	UP	-0.584794	6.67748e-05	0.00214481	UP	38.2135	39.7564	31.7647	30.593	21.1942	23.8021	25.1725	28.2616	22.1131	26.1365	24.1455	22.0958
XLOC_012636	CSNK1G1,PPIB	chr15:64443915-64649435	-0.672108	1.00835e-05	0.00046374	UP	-0.61483	2.16733e-05	0.000865623	UP	323.171	331.474	237.849	258.908	160.86	165.123	185.68	198.803	191.808	205.36	181.273	169.614
XLOC_012680	PKM2	chr15:72491289-72524553	-0.721805	6.5106e-06	0.000326775	UP	-0.661263	8.78082e-06	0.000415342	UP	262.915	257.383	209.234	200.36	126.34	132.422	140.757	154.531	148.636	151.017	140.907	142.598
XLOC_012685	ADPGK	chr15:72968122-73090540	-0.717638	5.63856e-05	0.00186879	UP	-0.545008	0.0016528	0.0244388	UP	18.9852	21.1197	18.045	18.1518	11.0786	10.7656	12.2471	12.2291	12.6874	13.7702	13.2785	12.6342
XLOC_012688	C15orf59	chr15:74032140-74043816	-1.00809	9.85481e-06	0.000454988	UP	-0.706675	0.00387106	0.045038	UP	2.51816	2.64898	2.12105	2.16873	1.15684	1.09423	1.12445	1.27267	1.57111	1.48028	1.30916	1.39197
XLOC_012721	NRG4	chr15:76228385-76304785	-0.488531	0.000803237	0.0142854	UP	-0.48819	0.00112307	0.0183641	UP	3.27398	3.24183	3.81392	4.05321	2.75862	2.44252	2.5505	2.45663	2.29078	2.49149	2.72792	2.79866
XLOC_012740	CTSH	chr15:79214091-79237420	-0.853996	1.31384e-07	1.16085e-05	UP	-0.685676	5.2445e-05	0.00176288	UP	10.8449	12.5873	10.6366	9.77849	5.1619	5.81731	6.42112	6.707	6.03192	7.53116	6.93887	6.62583
XLOC_012788	HAPLN3,MFGE8	chr15:89420518-89457752	-0.893627	1.24603e-06	8.18515e-05	UP	-0.595968	0.000428157	0.00890065	UP	491.962	538.703	407.364	461.038	233.057	244.356	277.791	265.946	282.87	345.72	325.55	297.073
XLOC_012834	SELS	chr15:101806627-101820876	-0.606322	0.000176684	0.00452152	UP	-0.513753	0.00189735	0.0269362	UP	24.0312	26.0015	18.9415	19.476	13.0966	13.3821	15.6866	15.6631	15.0331	17.0781	15.6461	14.2256
XLOC_013673	DECR2,NME4	chr16:444265-462596	-0.448081	0.00287588	0.0363886	UP	-0.432979	0.00290091	0.0366104	UP	191.921	190.596	144.414	145.564	113.885	116.672	128.558	129.632	121.982	130.501	120.976	118.234
XLOC_013736	TNFRSF12A	chr16:3069860-3095165	-1.22686	2.04131e-07	1.71243e-05	UP	-0.795859	0.000443059	0.00914625	UP	51.0883	50.6683	40.4237	42.4934	16.4907	18.9024	20.7236	22.4372	26.2024	27.914	26.5456	24.7757
XLOC_013765	SEC14L5	chr16:5008317-5069520	-0.856895	8.91284e-06	0.000420581	UP	-0.705097	0.000589645	0.0113795	UP	1.80066	1.75487	1.44081	1.55266	0.783026	0.874784	0.922414	1.01542	0.997378	1.04806	1.0332	0.924229
XLOC_013776	GRIN2A	chr16:9753964-10277430	-0.599908	0.000716069	0.0130887	UP	-3.7185	0	0	UP	14.7955	16.1602	16.4939	19.0446	11.8707	9.74212	10.5337	11.8449	1.17266	1.29976	1.30868	1.29398
XLOC_013796	NOMO1	chr16:14927642-14990014	-0.670273	1.26177e-06	8.26888e-05	UP	-0.630826	2.17459e-06	0.000129424	UP	49.8049	56.9679	48.3162	51.3836	31.9216	30.7917	33.6653	32.9547	30.6876	36.0529	33.2245	33.2333
XLOC_013807	NOMO3	chr16:16326388-16388668	-0.622426	4.24074e-06	0.00022796	UP	-0.923735	3.90554e-12	1.01895e-09	UP	30.4553	34.9609	29.968	31.5177	20.3819	19.6	21.339	20.864	15.4726	18.0591	16.7067	16.5867
XLOC_013839	EEF2K	chr16:22217591-22300370	-0.430724	0.00211131	0.0291168	UP	-0.415354	0.00322798	0.0394596	UP	7.33274	7.42907	5.87836	6.13487	4.65381	4.64714	5.14807	5.36356	4.9696	5.23938	4.91655	4.93331
XLOC_013847	SCNN1G	chr16:23194026-23228202	-1.15594	1.87819e-06	0.000114494	UP	-0.783617	0.00286462	0.036296	UP	0.761972	0.870299	0.742093	0.77143	0.305766	0.373362	0.353755	0.370512	0.339101	0.494736	0.544005	0.435595
XLOC_013929	ZNF267	chr16:31885054-31932608	-0.837136	5.69873e-08	5.65552e-06	UP	-0.59293	0.000172566	0.00445388	UP	8.46443	9.8399	8.10722	8.48631	4.80611	4.55285	4.93115	5.31977	5.21148	6.17888	6.0098	5.87886
XLOC_013936	GPT2	chr16:46917927-46966494	-0.795877	1.4269e-08	1.66974e-06	UP	-0.540691	8.40504e-05	0.00256844	UP	36.5648	36.5657	26.511	29.8326	16.7187	17.581	20.0723	19.8356	22.9403	23.8522	20.7978	20.9499
XLOC_013955	IRX5	chr16:54964598-54988991	-1.60735	1.47515e-08	1.72134e-06	UP	-0.878905	0.00223364	0.0302706	UP	2.21944	1.61705	3.82513	1.73395	0.732613	0.72259	0.88954	0.7102	1.09578	1.17939	1.33776	1.46999
XLOC_013957	LPCAT2,MMP2	chr16:55512679-55620582	-0.429385	0.00294571	0.0370093	UP	-0.709426	8.10649e-07	5.63286e-05	UP	24.8026	28.3813	23.1442	24.6856	19.5205	17.9362	18.685	18.4808	14.8578	16.6307	15.4228	14.6257
XLOC_013978	MT1X	chr16:56716381-56718108	-0.46809	0.00366978	0.0432728	UP	-0.625656	0.000274729	0.00634023	UP	56.0363	68.0167	47.438	47.5251	33.8933	35.4095	41.1724	48.3053	34.2365	40.2669	32.7744	34.2735
XLOC_013989	CX3CL1	chr16:57406413-57418956	-1.26156	9.57834e-12	2.31011e-09	UP	-0.667412	0.000448139	0.00923735	UP	2.60571	2.77993	2.72508	2.39231	1.03724	1.00535	1.13686	1.17811	1.44832	1.69931	1.77061	1.65673
XLOC_013999	MMP15	chr16:58059281-58080804	-0.807129	2.4187e-09	3.50209e-07	UP	-0.509965	0.00013901	0.00381386	UP	17.4361	19.2446	17.3279	17.4122	9.88879	9.71057	10.6568	10.3062	11.05	13.6574	12.8384	12.2599
XLOC_014045	CDH3	chr16:68677253-68735646	-1.06117	2.84217e-14	9.99168e-12	UP	-0.732208	6.18982e-08	6.08465e-06	UP	46.4595	55.8158	43.4877	51.8089	21.9849	22.0442	24.709	25.4162	25.7582	32.722	30.1504	29.8371
XLOC_014046	CDH1	chr16:68755907-68870967	-0.936169	2.89562e-09	4.1278e-07	UP	-0.434172	0.00324756	0.0396347	UP	129.021	151.255	135.437	137.317	65.5961	67.5598	77.0274	78.5542	86.4337	111.373	108.835	102.723
XLOC_014067	IL34	chr16:70613797-70694856	-0.737128	3.37847e-06	0.000189007	UP	-0.790364	2.52736e-06	0.000147562	UP	11.2013	12.0239	9.13897	10.9166	5.7812	5.70033	6.88913	7.48553	5.94776	6.49194	6.36806	5.99971
XLOC_014072	CHST4	chr16:71559754-71610998	-0.727761	4.02925e-05	0.00141829	UP	-0.646277	0.000632365	0.0119389	UP	7.9197	9.10394	6.69369	7.57999	4.29123	4.60596	5.0323	4.90424	4.57293	5.77942	4.9879	4.63058
XLOC_014074	MARVELD3	chr16:71657268-71677329	-1.01038	5.22288e-08	5.26272e-06	UP	-0.820958	1.48766e-05	0.000639027	UP	17.5533	19.8458	14.4772	16.6873	7.0925	8.0917	9.10504	9.34669	8.64039	10.4019	9.94423	9.4182
XLOC_014157	ZNF778	chr16:89268233-89305411	-0.568503	0.00187709	0.026754	UP	-0.722618	0.000117191	0.00332746	UP	6.59418	7.11838	5.53187	5.52154	3.64373	3.88536	4.55055	4.58716	3.80657	3.92949	3.73381	3.55529
XLOC_014260	TRAP1	chr16:3661704-3769101	-0.59808	3.04489e-05	0.00113845	UP	-0.479953	0.000515992	0.0102711	UP	75.6368	76.5374	62.75	63.8239	42.6863	42.7689	47.2651	48.9025	48.6533	52.9254	47.7893	48.5645
XLOC_014270	C16orf5	chr16:4474368-4588816	-0.734559	2.76349e-05	0.00105317	UP	-0.523155	0.00215236	0.0294772	UP	29.7335	29.456	21.8536	22.6644	14.1158	14.9353	16.2303	16.9383	17.6094	19.7064	17.5401	16.9402
XLOC_014276	PPL	chr16:4932507-4987136	-1.0425	2.37588e-14	8.5332e-12	UP	-0.947564	4.89031e-12	1.23698e-09	UP	11.777	12.3886	10.5701	10.8749	4.78172	5.04879	5.6804	6.0882	5.27297	5.95348	6.06445	6.0227
XLOC_014287	EMP2	chr16:10609068-10680896	-0.556408	5.18911e-05	0.0017479	UP	-0.406536	0.0030032	0.0374964	UP	11.9608	12.4961	12.3053	10.3643	7.72575	7.77278	8.48113	8.12992	8.54561	9.51106	9.17581	8.36031
XLOC_014291	SOCS1	chr16:11348273-11350039	-0.999417	6.46493e-09	8.31581e-07	UP	-0.883322	1.54623e-06	9.74803e-05	UP	11.3493	11.9206	7.91377	9.69367	4.90662	4.73468	5.57674	5.24961	5.47787	6.26803	4.96822	5.3004
XLOC_014327	NOMO2	chr16:18511181-18573434	-0.579304	2.19999e-05	0.000876678	UP	-0.693009	3.19561e-07	2.52022e-05	UP	22.7146	26.4154	23.0481	23.7242	16.0168	15.2098	16.6212	16.1941	13.3284	16.1563	15.0138	14.7658
XLOC_014329	GDE1	chr16:19421826-19533602	-0.644242	1.37566e-05	0.000600382	UP	-0.493959	0.000816808	0.0144524	UP	19.3816	20.3298	15.2424	15.2959	10.0327	10.5675	12.0022	12.3545	12.1991	13.6246	12.7854	11.3241
XLOC_014331	GPRC5B	chr16:19717673-19896978	-0.756658	9.89052e-06	0.000456383	UP	-0.488431	0.00300217	0.0374891	UP	72.2985	76.6764	63.0341	60.6689	36.1115	38.6756	43.7854	42.5918	45.6844	52.9615	49.5488	45.7326
XLOC_014355	CDR2	chr16:22357256-22385938	-0.444421	0.00269742	0.0347508	UP	-0.519612	0.000711342	0.0130137	UP	10.4739	10.6575	8.08753	8.08724	5.88488	6.39462	7.02207	7.67248	6.6928	6.8819	6.31267	6.06392
XLOC_014380	MIR4721,TUFM	chr16:28853731-28857729	-0.602779	1.70918e-05	0.000713301	UP	-0.521847	0.000105498	0.00307029	UP	117.348	165.649	96.2739	98.9556	66.1626	64.6849	73.9183	78.2958	75.4495	81.3257	73.2881	71.355
XLOC_014388	CDIPT	chr16:29869677-29874578	-0.664387	1.74481e-06	0.000107869	UP	-0.414494	0.00290936	0.0366892	UP	28.2188	29.6997	23.674	24.8597	15.5266	15.5752	18.2083	17.8346	19.3912	21.0364	19.9857	18.9456
XLOC_014402	DCTPP1	chr16:30435018-30441373	-0.605636	2.02657e-05	0.000818181	UP	-0.564477	9.57962e-05	0.00284332	UP	45.0758	43.752	32.8908	31.4688	22.9557	23.2969	26.162	27.8999	27.7812	27.4475	24.6362	23.186
XLOC_014416	PRSS8	chr16:31126791-31148532	-1.07311	5.55532e-10	9.31117e-08	UP	-0.628476	0.000155879	0.00415038	UP	52.1234	58.7489	47.3765	47.4934	21.3893	22.1305	26.4507	27.2811	30.2575	36.4077	34.6693	30.7456
XLOC_014535	DPEP3	chr16:68009563-68014452	-2.00859	0	0	UP	-1.71664	6.88338e-15	2.70657e-12	UP	5.16742	6.3996	5.75728	5.60057	1.13429	1.30201	1.47864	1.75297	1.31874	1.80268	1.941	1.88353
XLOC_014540	ESRP2	chr16:68119268-68270136	-0.641524	0.000702189	0.0128924	UP	-0.616889	0.000977317	0.0165343	UP	11.9092	11.8693	9.37321	10.3329	6.33927	6.45584	7.43983	7.56218	6.91349	7.58801	6.87223	6.87789
XLOC_014586	BCAR1	chr16:75260009-75302484	-0.894442	2.52169e-09	3.6322e-07	UP	-0.713871	1.29884e-06	8.465e-05	UP	28.2573	27.6612	21.1	24.0623	13.3656	12.4192	14.1793	14.0586	15.641	16.1282	14.0585	15.0068
XLOC_014604	SDR42E1	chr16:82025788-82045096	-3.46045	0	0	UP	-2.81123	1.0451e-11	2.51326e-09	UP	1.05382	1.0837	1.05585	0.918534	0.0834607	0.106788	0.0868899	0.095404	0.135277	0.148078	0.171774	0.131386
XLOC_014612	COTL1	chr16:84599198-84651669	-0.819036	4.33525e-09	5.85738e-07	UP	-0.602192	9.72715e-06	0.000450478	UP	97.5708	97.1842	61.4754	72.8535	41.2365	43.5656	49.5032	51.5872	55.7531	58.9214	50.7556	50.4524
XLOC_014613	ZDHHC7	chr16:85008066-85045141	-0.628098	7.23221e-06	0.00035465	UP	-0.450287	0.00120105	0.0192591	UP	20.5103	21.0661	17.2127	16.9666	11.622	11.571	12.7561	13.0417	13.9314	14.7126	13.3517	13.3173
XLOC_014630	SLC7A5	chr16:87863547-87903100	-1.17827	1.51212e-13	4.82519e-11	UP	-0.801892	9.16978e-08	8.45311e-06	UP	173.223	196.389	124.645	162.891	64.3575	67.5244	81.7945	76.4702	95.275	106.414	89.1787	83.2358
XLOC_014632	CYBA,MVD	chr16:88709695-88729602	-0.613623	0.000481665	0.00972543	UP	-0.501887	0.00344074	0.0413237	UP	123.859	124.425	99.759	104.97	71.9484	68.6477	79.319	74.5073	78.2679	86.6962	76.3573	75.4531
XLOC_014652	DBNDD1	chr16:89983466-90162582	-0.861601	0.00175653	0.0256075	UP	-0.748212	0.00441625	0.0493681	UP	34.1341	33.8797	26.6322	26.0988	14.0555	15.3006	18.054	18.0989	17.11	18.8095	18.2978	16.732
XLOC_015401	ATP1B2	chr17:7553634-7561089	-1.0046	7.37965e-11	1.48247e-08	UP	-0.575091	0.000333023	0.00734244	UP	7.66411	8.33174	8.05506	6.98591	3.50956	3.8594	4.0424	4.05557	4.47543	5.50501	5.88651	5.00238
XLOC_015407	KDM6B	chr17:7737515-7758224	0.675733	0.000130382	0.00362873	DOWN	0.667112	0.000254031	0.00599429	DOWN	1.58746	1.45276	2.07828	1.36145	2.61248	2.51611	2.71782	2.4695	2.53651	2.22271	2.65899	2.7805
XLOC_015425	USP43,WDR16	chr17:9479943-9633003	-0.658534	0.00269943	0.0347557	UP	-0.752884	0.00140386	0.021581	UP	2.1506	2.17399	1.74593	1.90948	1.12698	1.15578	1.32979	1.41131	1.21519	1.20449	1.17378	1.11321
XLOC_015558	TMEM98	chr17:31254413-31277463	-0.760959	4.80647e-08	4.88095e-06	UP	-0.537686	0.000128241	0.00358008	UP	40.6087	43.9666	34.9018	33.6792	20.5287	21.5484	23.4016	24.4174	25.6973	28.3331	26.7784	24.3405
XLOC_015605	LASP1	chr17:37025408-37080512	-0.565996	5.30668e-05	0.00177888	UP	-0.463203	0.000619695	0.011772	UP	50.9668	51.667	36.0321	38.2024	27.8807	27.9826	30.9779	32.2687	32.4867	34.8433	30.5266	30.1265
XLOC_015617	GRB7	chr17:37891392-37903538	-0.917847	6.17593e-07	4.43246e-05	UP	-0.600203	0.00132727	0.0207837	UP	10.2906	10.291	7.70027	8.42997	4.41797	4.53916	5.17912	5.19138	5.89333	6.29486	6.0684	5.81031
XLOC_015628	IGFBP4	chr17:38598687-38619801	-0.906675	4.23734e-11	9.03742e-09	UP	-0.767477	1.20497e-08	1.44468e-06	UP	73.4958	76.702	51.5469	59.4231	30.7226	32.8615	36.7075	37.9686	38.2503	43.4256	36.9483	33.8501
XLOC_015680	G6PC3	chr17:42148097-42201821	-0.680576	7.57855e-05	0.00237358	UP	-0.485193	0.00396195	0.04573	UP	66.6893	71.7048	59.6179	58.9232	37.4146	37.7738	43.5271	41.7171	43.7017	50.8265	45.8399	42.4911
XLOC_015723	NFE2L1	chr17:46119921-46141260	-0.712948	3.52855e-06	0.000195688	UP	-0.419944	0.00358156	0.042526	UP	87.2986	93.3135	74.9501	79.4873	46.9168	48.8035	53.3416	53.5425	60.171	67.5645	62.2399	59.3702
XLOC_015729	ATP5G1	chr17:46970147-46973232	-0.586935	9.96499e-05	0.00293488	UP	-0.495806	0.0011263	0.0184054	UP	88.4181	93.327	71.5958	78.0325	54.4611	51.3812	57.1039	57.7024	56.1056	65.8247	55.2909	56.9193
XLOC_015786	YPEL2	chr17:57409052-57479095	0.982284	1.47032e-06	9.33335e-05	DOWN	0.879268	7.10268e-05	0.00225519	DOWN	0.371185	0.393394	0.413698	0.348061	0.696975	0.767851	0.806109	0.752319	0.668899	0.693596	0.767682	0.686184
XLOC_015824	CACNG4	chr17:64953298-65031638	-0.925807	3.63304e-06	0.000200678	UP	-0.711657	0.000750002	0.0135891	UP	2.23772	2.62124	1.98392	2.04066	1.05743	1.03019	1.2647	1.30136	1.35408	1.34147	1.45632	1.24876
XLOC_015954	FAM101B	chr17:289770-295731	-0.770381	3.9128e-08	4.07826e-06	UP	-0.750569	1.18315e-07	1.05656e-05	UP	17.6053	18.0864	9.89053	13.3431	7.54319	8.08454	8.91737	10.0651	8.85535	9.70526	8.15455	8.27481
XLOC_016001	MYBBP1A	chr17:4402128-4458957	-0.538142	0.000155978	0.00415038	UP	-0.505959	0.000279983	0.00643644	UP	39.6418	39.756	31.947	34.9083	24.5034	22.6135	26.3481	26.0034	25.8231	26.9289	23.5581	25.6155
XLOC_016040	CLDN7	chr17:7093209-7166512	-0.957617	0.00359885	0.0426668	UP	-0.925135	0.00291482	0.0367245	UP	57.3049	65.1486	49.0754	56.4775	24.9406	27.2905	32.8194	32.64	27.2722	33.4982	30.4754	28.6543
XLOC_016073	GAS7	chr17:9813876-10102233	-0.964631	1.18505e-09	1.84118e-07	UP	-0.920476	7.74169e-08	7.34894e-06	UP	2.6744	2.79478	2.34015	2.25996	1.15447	1.24632	1.34076	1.40095	1.32879	1.41176	1.34807	1.2239
XLOC_016104	PLD6	chr17:17101617-17109998	-0.694625	0.00360566	0.0427414	UP	-2.11363	1.09023e-10	2.09865e-08	UP	1.35544	1.41657	1.33086	1.22488	0.769068	0.774142	0.854797	0.898218	0.279213	0.273859	0.346583	0.332925
XLOC_016110	SREBF1	chr17:17584504-17744077	-0.820301	6.39828e-08	6.24719e-06	UP	-0.602315	4.76329e-05	0.00162527	UP	27.1907	28.1713	24.3103	27.5044	16.3511	14.318	16.2682	13.4451	16.9259	18.2633	16.789	17.9822
XLOC_016134	C17orf51	chr17:21428245-21454961	2.36267	0	0	DOWN	3.05762	0	0	DOWN	0.214594	0.183098	0.132928	0.195983	1.00079	0.925117	0.93073	0.884609	1.55302	1.54781	1.48463	1.47126
XLOC_016146	SLC46A1	chr17:26698986-26734230	-0.769321	1.44729e-05	0.000624418	UP	-0.578529	0.00136133	0.0211324	UP	2.85541	3.03806	2.34329	2.59551	1.54258	1.49334	1.6676	1.62402	1.86532	1.90019	1.79576	1.68658
XLOC_016310	KRT19	chr17:39679868-39684641	-0.752434	3.89891e-08	4.07401e-06	UP	-0.438728	0.00122322	0.0195498	UP	56.9186	55.4756	43.3663	41.835	26.3856	26.2403	31.1199	31.2212	36.6182	37.6985	34.9204	34.6392
XLOC_016333	PTRF	chr17:40553766-40575754	-0.806297	4.92612e-09	6.60259e-07	UP	-0.619684	6.96025e-06	0.000344961	UP	19.7557	19.3129	15.1559	15.1954	8.16698	9.32331	10.4544	11.1049	10.7639	11.5785	11.4322	11.0511
XLOC_016350	DUSP3	chr17:41843488-41856368	-0.532676	0.000306398	0.00690402	UP	-0.43268	0.00427471	0.0482722	UP	6.81045	6.79198	5.56919	5.56758	3.88154	4.02331	4.36867	4.83169	4.68058	4.52999	4.7558	4.37876
XLOC_016410	HOXB2	chr17:46620018-46622393	3.31621	9.0067e-08	8.33055e-06	DOWN	2.97889	5.06117e-06	0.000263594	DOWN	0.0305912	0.0040493	0.0540719	0.014415	0.336833	0.331625	0.207961	0.137288	0.326484	0.137705	0.226651	0.0952291
XLOC_016429	PHB	chr17:47481419-47492242	-0.478191	0.000470352	0.0095528	UP	-0.381351	0.00409226	0.046785	UP	92.0979	93.2524	66.8126	69.0598	51.7585	53.5425	59.6738	63.7694	64.1064	66.5882	57.3069	57.4921
XLOC_016432	SLC35B1	chr17:47778689-47786997	-0.676801	4.3364e-06	0.000231514	UP	-0.43161	0.00410008	0.0468485	UP	32.5258	34.1163	27.2477	27.0202	17.1284	17.6831	20.4337	20.5803	22.8689	24.3731	22.0231	20.463
XLOC_016440	COL1A1	chr17:48261456-48279000	-1.5423	0	0	UP	-0.56792	2.14336e-05	0.000857819	UP	33.4234	37.6086	41.108	40.6101	13.8973	12.1963	12.3494	13.7144	20.3686	26.4724	26.9576	28.5865
XLOC_016498	CYB561	chr17:61509664-61523722	-0.767587	3.36664e-07	2.62269e-05	UP	-0.463925	0.00248569	0.0327761	UP	12.5557	13.0836	10.4493	10.3715	6.29692	6.4663	7.37113	7.13745	8.431	9.01013	8.22559	7.91769
XLOC_016535	ABCA10,ABCA5	chr17:67144147-67323372	-1.18109	3.34938e-07	2.61415e-05	UP	-1.10154	1.04148e-05	0.000475025	UP	0.749557	0.828753	0.591336	0.845176	0.336432	0.336581	0.337969	0.327504	0.354134	0.361824	0.35267	0.346076
XLOC_016563	HN1	chr17:73131343-73150775	-0.514674	0.000169921	0.00440276	UP	-0.566635	2.33808e-05	0.000921087	UP	89.521	91.3168	69.1526	69.3236	50.9199	51.4194	57.5511	62.2464	54.2813	57.4634	52.3006	51.4709
XLOC_016580	EVPL	chr17:74002630-74023519	-1.28567	0.000529603	0.0104766	UP	-1.58394	0.0010978	0.0180428	UP	0.327946	0.261306	0.237225	0.270642	0.0904687	0.0992493	0.125378	0.118625	0.0919789	0.10999	0.0645812	0.091214
XLOC_016604	SOCS3	chr17:76352841-76358123	-1.20841	8.15126e-13	2.39815e-10	UP	-1.00943	8.10953e-09	1.0148e-06	UP	8.78075	9.19601	6.15448	7.6096	3.21856	3.08353	3.59217	3.75934	4.02804	4.1564	3.71672	3.76624
XLOC_016608	TIMP2	chr17:76849058-76921472	-0.784534	1.23336e-08	1.47021e-06	UP	-0.520797	0.000134841	0.00372906	UP	21.0185	22.0642	17.5574	16.7916	10.2739	10.6361	12.2943	11.8733	12.7883	14.7433	13.8981	12.5945
XLOC_016617	EIF4A3	chr17:78109012-78124443	-0.478518	0.00127883	0.0202635	UP	-0.494451	0.000649727	0.0121847	UP	72.771	70.555	53.2508	56.414	41.817	42.3843	47.3308	48.3262	46.5109	49.133	41.1409	42.6215
XLOC_017233	MYL12B	chr18:3260450-3279742	-0.412281	0.00264756	0.0343215	UP	-0.464882	0.00065132	0.0122012	UP	94.8862	96.7524	70.0114	70.4711	52.668	56.832	63.6331	74.0982	59.5393	65.6241	59.2524	56.0672
XLOC_017252	RAB31	chr18:9708227-9862553	-0.424182	0.00216536	0.0296015	UP	-0.427566	0.002166	0.0296017	UP	12.4017	13.2859	10.4645	10.8434	8.50042	8.29995	8.40105	9.97838	8.53576	9.32759	8.58958	8.64977
XLOC_017310	DSG2	chr18:29077294-29136874	-0.753518	6.91008e-07	4.87916e-05	UP	-0.438982	0.00205953	0.0286216	UP	82.5323	97.4399	78.0325	82.8076	46.7695	49.1714	52.7094	54.0658	56.8505	69.2027	64.8137	61.4053
XLOC_017320	DTNA	chr18:32066792-32471900	-0.777354	0.000280723	0.00645165	UP	-0.635993	0.00344795	0.0414043	UP	6.50037	7.06798	4.99024	5.75842	3.16634	3.29316	3.80932	3.99934	3.9001	4.18488	4.00432	3.67749
XLOC_017324	GALNT1	chr18:33161794-33299253	-0.766422	3.23979e-08	3.48629e-06	UP	-0.480269	0.000358373	0.00778141	UP	38.0467	43.0079	35.303	35.3598	21.3092	21.5821	22.577	24.4281	25.4282	29.5422	27.744	26.8532
XLOC_017382	SEC11C	chr18:56807124-56826110	-0.637935	2.28035e-05	0.000901342	UP	-0.497703	0.00124581	0.0198426	UP	46.5275	48.1975	33.9784	34.1335	21.2707	23.5253	27.4293	30.9234	30.5057	31.6812	28.0021	25.3003
XLOC_017384	PMAIP1	chr18:57567191-57571538	-0.515025	0.000165441	0.00432304	UP	-0.639769	3.11804e-06	0.000176581	UP	36.99	40.0494	29.2417	30.2864	21.2867	22.3083	24.0679	28.7887	21.6621	24.0663	22.2376	20.4788
XLOC_017406	LOC100505817	chr18:70992175-71018421	-0.678311	2.3801e-06	0.000140347	UP	-0.818812	3.41783e-08	3.65889e-06	UP	36.2143	39.7389	29.1497	34.9257	19.8398	21.6368	21.7411	23.7213	17.7421	21.6798	20.1936	19.9427
XLOC_017409	CNDP2	chr18:72163378-72197158	-0.492407	0.000413871	0.00868418	UP	-0.416178	0.00209913	0.0290067	UP	33.2513	33.3928	25.0083	25.1551	19.0974	18.9653	21.3404	22.6971	22.6943	23.3548	20.6416	20.5695
XLOC_017472	CXADRP3	chr18:14461624-14507139	0.900173	0.00445977	0.0496885	DOWN	1.60708	2.74648e-07	2.21013e-05	DOWN	0.957321	0.950283	1.06658	1.13221	2.27902	1.7847	1.95857	1.62308	3.46612	2.78118	3.05091	3.17979
XLOC_017473	POTEC	chr18:14507229-14650340	1.04544	4.79389e-05	0.00163339	DOWN	1.55562	8.32618e-10	1.3492e-07	DOWN	0.529439	0.567948	0.510966	0.578932	1.27864	1.14002	1.09046	1.10474	1.89085	1.47089	1.71265	1.60815
XLOC_017521	LOC647946	chr18:36786791-37380412	2.27562	2.75241e-06	0.000158912	DOWN	1.80588	0.000373753	0.00803337	DOWN	0.681161	0.592801	0.505348	0.632616	2.6808	2.83449	3.11874	3.04271	2.39778	1.91804	2.06398	2.06785
XLOC_017578	LMAN1	chr18:56995055-57026508	-0.614644	8.54973e-06	0.00040673	UP	-0.469305	0.000410357	0.00863268	UP	41.3581	47.6785	40.61	38.8208	25.0609	27.2632	28.032	30.4916	27.3817	32.7141	32.3013	30.1993
XLOC_017587	SERPINB4	chr18:61304490-61311502	-1.51165	0.000160284	0.00422833	UP	-1.59178	0.00107017	0.0177008	UP	0.333025	0.49904	0.157637	0.380003	0.07609	0.116182	0.133083	0.154022	0.106711	0.138272	0.0818862	0.130295
XLOC_017602	CYB5A	chr18:71920526-71959251	-0.48233	0.00114943	0.0186197	UP	-0.553238	0.000342624	0.00750662	UP	44.1773	47.219	31.4949	35.4416	24.1151	26.8583	28.6467	31.836	26.97	29.723	25.2667	25.1323
XLOC_017980	WDR18	chr19:980257-998434	-0.589236	3.76218e-05	0.00134251	UP	-0.54369	0.000181226	0.00461073	UP	31.8058	30.949	25.9359	24.0957	17.3401	17.4911	20.2255	19.4509	19.4661	20.1068	18.0886	18.8561
XLOC_018002	ADAT3,SCAMP4	chr19:1905372-1926570	-0.740971	2.39254e-06	0.00014088	UP	-0.475573	0.00225629	0.0304794	UP	27.1751	27.5448	25.3061	24.533	15.4355	14.8304	16.8067	15.3439	17.6083	19.5035	19.2959	18.2358
XLOC_018020	NCLN	chr19:3185578-3214379	-0.761771	2.59184e-08	2.83008e-06	UP	-0.553957	3.26411e-05	0.0012004	UP	39.8248	41.5922	34.7639	36.5272	22.5107	20.7576	24.1597	22.0107	24.8513	27.6396	25.1812	25.4537
XLOC_018032	ITGB1BP3	chr19:3932996-3942414	-1.11346	1.28482e-11	3.05433e-09	UP	-0.768925	3.66174e-06	0.000201985	UP	36.5556	36.2514	25.7106	28.9886	12.4987	13.2819	16.0563	16.5258	18.0993	20.0301	18.3405	17.5166
XLOC_018062	CLPP	chr19:6361462-6370470	-0.518876	0.000548282	0.0107462	UP	-0.495213	0.00140069	0.0215489	UP	28.6547	27.2122	20.6349	20.9293	16.2602	16.0488	17.7796	17.5477	17.4	18.7058	16.213	16.237
XLOC_018065	TNFSF9	chr19:6530913-6536813	-1.36991	7.31153e-06	0.00035767	UP	-1.13873	0.000631317	0.011923	UP	0.884127	1.06688	0.815042	0.883899	0.304823	0.355272	0.410565	0.339796	0.436626	0.408924	0.437859	0.361762
XLOC_018066	TRIP10	chr19:6739706-6751529	-0.696119	3.40149e-06	0.000189896	UP	-0.511931	0.000692887	0.0127577	UP	22.9576	22.9993	17.6293	17.8648	10.9923	11.5849	13.0719	13.3635	13.9154	15.0725	13.8501	13.4675
XLOC_018067	VAV1	chr19:6772409-6857371	-3.00405	3.35032e-11	7.21981e-09	UP	-2.98578	2.07247e-08	2.31766e-06	UP	0.384524	0.436406	0.30745	0.340792	0.0319302	0.0528162	0.044965	0.0503897	0.0596368	0.0509362	0.0564145	0.0221296
XLOC_018089	CERS4	chr19:8273982-8331587	-0.854808	3.24133e-07	2.54901e-05	UP	-0.601275	0.000342408	0.00750549	UP	26.1881	27.0795	24.0715	22.6506	12.5903	13.2624	14.5462	14.8294	15.2434	17.9704	17.0788	15.3712
XLOC_018099	ZNF317	chr19:9250475-9279374	-0.695833	1.81066e-06	0.000111065	UP	-0.43859	0.00308535	0.0382302	UP	11.5233	11.72	9.69632	9.52055	6.00362	6.20008	6.96573	6.99164	7.81685	8.20088	7.54929	7.72482
XLOC_018114	MRPL4	chr19:10362309-10370736	-0.596363	7.71114e-05	0.00240784	UP	-0.441254	0.00305559	0.0379677	UP	32.9618	32.6488	25.8785	26.0981	17.5744	18.0838	20.4729	20.8759	21.8228	22.8005	20.1471	20.8113
XLOC_018137	PRKCSH	chr19:11530988-11591805	-0.648003	3.41169e-05	0.00124146	UP	-0.429636	0.00332388	0.0403355	UP	140.465	151.098	142.375	141.372	91.4959	85.2708	95.9015	90.4053	97.8105	113.766	106.213	106.845
XLOC_018138	CNN1	chr19:11649578-11661508	-1.18162	1.01618e-10	1.97415e-08	UP	-0.673757	0.000328623	0.00729083	UP	8.43609	8.37357	5.4848	6.95671	2.5897	3.06152	3.27005	3.64159	4.60309	4.75577	4.52662	4.18272
XLOC_018158	JUNB	chr19:12892235-12906428	-0.991232	0.000231106	0.00557705	UP	-0.968552	0.00102436	0.0171173	UP	1.68081	1.79814	1.76965	1.52503	0.745168	0.80099	0.86965	0.979933	0.766418	0.884311	0.916472	0.864969
XLOC_018179	CD97	chr19:14491955-14519537	-0.854894	4.76011e-05	0.00162521	UP	-1.0937	2.61852e-06	0.000152241	UP	1.80363	2.02238	1.90125	1.92487	1.06508	0.986074	1.13177	1.0293	0.815311	0.881015	0.943208	0.926045
XLOC_018251	GATAD2A	chr19:19487807-19624376	-0.528376	0.000200789	0.0049839	UP	-0.412914	0.00266784	0.0345088	UP	29.4626	29.2377	22.452	23.0688	16.8172	16.5687	19.3748	19.1352	20.0934	20.6999	18.5515	18.4311
XLOC_018289	CCNE1	chr19:30302468-30315252	-0.579518	0.000245097	0.00583828	UP	-0.512222	0.00170758	0.0250924	UP	14.5291	14.8159	11.4409	10.9875	7.95351	7.73427	9.2775	9.62497	8.84537	10.1407	8.69469	8.5482
XLOC_018321	GRAMD1A,HPN,SCN1B	chr19:35489218-35604753	-0.599293	0.000229122	0.00554046	UP	-0.516187	0.00108015	0.0178411	UP	53.1848	53.022	47.9132	46.3696	31.1666	30.5516	34.4782	35.137	31.7356	36.0323	36.6153	34.4295
XLOC_018325	FXYD5,FXYD7	chr19:35634070-35663898	-0.657412	1.91404e-05	0.000783039	UP	-0.619832	8.19316e-05	0.00251668	UP	67.7318	70.89	52.7123	55.3856	35.2735	35.9309	40.5625	42.0729	37.4082	43.8046	40.1493	36.5001
XLOC_018326	LSR	chr19:35721721-35758867	-0.819055	3.65938e-08	3.86923e-06	UP	-0.53634	0.00028724	0.00656506	UP	81.871	86.905	71.0177	76.3928	42.8858	41.6498	49.6652	43.5986	51.5211	59.1292	52.7203	52.6016
XLOC_018334	GAPDHS,TMEM147	chr19:36022895-36059316	-0.724492	4.53683e-05	0.00156026	UP	-0.502586	0.00412164	0.0470108	UP	78.2201	81.5529	62.2726	63.2042	38.3341	39.6641	46.9372	47.4044	49.4395	56.3391	47.6586	46.9401
XLOC_018341	PSENEN	chr19:36236493-36237903	-0.667326	1.01654e-05	0.000466329	UP	-0.462412	0.00289596	0.0365702	UP	46.0844	49.4796	37.7658	37.5281	24.3763	24.9841	29.8478	27.7472	29.9398	33.9284	31.1783	28.7344
XLOC_018374	SPINT2	chr19:38753146-38783485	-0.817043	5.19657e-09	6.89821e-07	UP	-0.484526	0.000333457	0.00735005	UP	126.933	136.85	109.776	112.78	61.6725	65.1975	74.2837	74.4149	78.6794	95.5266	89.7585	82.8544
XLOC_018383	ACTN4	chr19:39137842-39237164	-0.69134	3.94934e-05	0.0013949	UP	-0.557721	0.000540793	0.010622	UP	71.3851	72.7763	57.2956	63.0675	39.4596	37.6553	41.7434	42.5977	44.1065	46.5402	42.6954	44.6509
XLOC_018409	PLD3	chr19:40799670-40896551	-0.903848	1.12114e-09	1.75173e-07	UP	-0.519367	0.000268328	0.0062324	UP	91.3588	101.527	88.7155	92.6351	49.3594	46.6952	54.0195	48.4087	59.135	70.5304	64.3275	64.6273
XLOC_018421	CYP2S1	chr19:41696118-41713868	-0.891047	5.57622e-10	9.31376e-08	UP	-0.542096	8.47835e-05	0.00258484	UP	110.157	118.77	86.9516	100.53	50.837	52.9892	62.7576	57.3555	66.3478	79.6035	71.5445	66.3633
XLOC_018438	ZNF574	chr19:42580289-42585720	-0.792847	9.18682e-08	8.45942e-06	UP	-0.502246	0.000900548	0.0155462	UP	9.65577	9.29644	8.03639	7.44148	4.76996	4.5721	5.41164	5.06355	6.18954	6.29206	5.73075	5.90418
XLOC_018447	CD177	chr19:43857660-43869007	-1.20456	0.00150549	0.0227621	UP	-1.38398	0.00169787	0.0249894	UP	0.379885	0.492563	0.358231	0.379386	0.174835	0.147872	0.185463	0.18951	0.171756	0.173299	0.145887	0.126782
XLOC_018472	BCAM,CBLC	chr19:45281047-45324916	-1.10275	4.49689e-11	9.51758e-09	UP	-0.662544	5.91511e-05	0.00194127	UP	41.9563	44.4247	40.081	40.2561	17.9304	18.2	20.9426	19.9259	23.7967	27.4105	26.9707	25.8876
XLOC_018473	PVRL2	chr19:45347898-45394251	-0.824004	1.49145e-07	1.2957e-05	UP	-0.687462	6.49238e-06	0.000326058	UP	76.9383	82.141	66.6234	69.3962	38.2848	38.8813	44.1071	43.6082	42.5801	48.9288	46.1067	43.6965
XLOC_018476	APOC2,APOC4,APOC4-APOC2,CLPTM1	chr19:45444783-45496604	-0.675975	7.72541e-07	5.37256e-05	UP	-0.474522	0.000426658	0.0088806	UP	39.2587	42.2239	35.2626	37.4922	23.6653	22.3894	26.2809	23.7157	26.2773	30.0894	27.0912	26.777
XLOC_018486	VASP	chr19:46008319-46088169	-0.730865	6.28534e-06	0.000317003	UP	-0.60614	0.000120692	0.00340838	UP	45.1806	44.9183	32.248	35.0191	21.5235	22.0703	24.739	25.9292	26.0544	27.8692	24.2765	24.2749
XLOC_018547	RUVBL2	chr19:49496741-49519224	-0.474923	0.000503433	0.0100645	UP	-0.512258	0.000152913	0.00409244	UP	69.3428	66.8334	52.4979	51.8721	39.1436	39.8202	44.975	45.5241	42.8169	44.5504	39.2785	40.1494
XLOC_018605	ZNF613	chr19:52427711-52456251	-0.754631	0.000336018	0.00739276	UP	-0.786631	0.000343199	0.00751196	UP	4.90315	5.75373	4.58073	4.63669	2.38904	2.81584	3.04287	3.45723	2.54116	3.11145	2.88995	2.95347
XLOC_018626	ZNF331	chr19:54023457-54083753	-0.470809	0.000722213	0.0131753	UP	-0.406658	0.00315908	0.0388809	UP	15.2203	16.3145	15.6373	17.4578	12.0653	11.1251	12.0533	11.4861	11.09	12.4924	12.5194	12.7725
XLOC_018664	MIR373	chr19:54291680-54295229	-1.14989	0.00214086	0.0293973	UP	-1.98404	4.70459e-05	0.0016109	UP	0.152418	0.0946986	0.142556	0.110336	0.0413122	0.0577401	0.0589829	0.0713867	0.0445729	0.0204993	0.0373163	0.0231447
XLOC_018666	MYADM	chr19:54368461-54381093	-0.899067	1.66134e-09	2.50154e-07	UP	-0.561336	0.000112253	0.00322145	UP	39.3286	42.5428	33.0179	36.2084	19.4026	19.6263	21.8167	20.4312	24.0765	28.3581	25.531	24.6481
XLOC_018677	TTYH1	chr19:54926604-54947899	-0.808055	4.96169e-08	5.02627e-06	UP	-0.600433	0.000100751	0.00296101	UP	23.9609	24.092	26.1519	20.8855	12.9604	13.3447	14.7687	12.8465	14.5379	15.3335	16.6145	15.7917
XLOC_018695	NLRP2	chr19:55476430-55514191	-0.713817	3.24511e-07	2.54956e-05	UP	-1.57646	0	0	UP	39.5251	42.0586	28.3723	31.2923	18.6849	19.9414	22.0334	24.0374	11.0462	13.6305	10.5621	11.789
XLOC_018715	LOC100128252	chr19:56950692-57010303	-0.837493	0.000976749	0.0165304	UP	-0.976998	0.000143937	0.00391152	UP	6.79472	7.33767	6.00703	6.08311	3.00468	3.35516	3.89043	4.60503	2.98903	3.52254	3.40034	3.50208
XLOC_018727	ZNF304	chr19:57862221-57871446	-0.772985	3.95175e-06	0.00021485	UP	-0.509701	0.00317912	0.0390581	UP	3.8618	3.9604	3.4716	3.35603	2.00286	2.016	2.19793	2.37977	2.53384	2.6698	2.62258	2.5028
XLOC_018761	FLJ45445	chr19:197015-202209	-0.668204	4.39305e-06	0.000233503	UP	-0.553252	0.000201058	0.00498833	UP	5.76888	5.74889	5.97546	7.0958	4.50307	3.35346	4.03331	3.41866	3.95015	3.99097	4.21203	4.44116
XLOC_018762	PPAP2C	chr19:281043-291435	-0.935382	7.74267e-11	1.53882e-08	UP	-0.817235	1.06094e-08	1.29254e-06	UP	71.6044	74.87	51.8759	62.6701	28.0682	31.5114	37.9623	38.4234	35.0782	40.7562	36.3755	34.7539
XLOC_018770	RNF126	chr19:639863-663364	-0.753215	1.55796e-06	9.79259e-05	UP	-0.477918	0.00290071	0.0366104	UP	23.3485	22.7212	18.7084	19.651	12.3836	11.7668	13.3459	12.3686	14.964	15.7404	14.7604	14.3948
XLOC_018774	R3HDM4	chr19:896502-913225	-0.765434	2.13871e-08	2.38495e-06	UP	-0.490997	0.000307189	0.0069181	UP	36.5518	38.9133	33.6645	34.7262	20.6761	19.0074	21.8909	22.5428	23.9659	27.1129	24.907	25.8308
XLOC_018775	C19orf6	chr19:1000314-1021369	-0.669418	6.01243e-06	0.000305467	UP	-0.452961	0.00188378	0.0267941	UP	39.0283	38.3919	34.9541	37.7017	24.484	22.518	24.8111	21.674	25.0338	27.6147	28.1531	28.1981
XLOC_018792	KLF16	chr19:1852397-1863564	-0.781626	3.56375e-07	2.74786e-05	UP	-0.527541	0.000703634	0.0129126	UP	11.9522	11.86	9.3026	8.85241	5.66529	5.714	6.58729	6.48653	7.3508	8.03632	6.88835	6.6412
XLOC_018810	SGTA	chr19:2754711-2783354	-0.587986	1.55207e-05	0.000661034	UP	-0.45666	0.000724328	0.0132076	UP	37.036	35.4059	27.9817	27.952	19.6804	19.4333	22.7927	22.2806	24.0795	24.4908	21.8954	21.9403
XLOC_018824	DAPK3,MIR637	chr19:3952574-3972103	-0.75248	2.03214e-06	0.000122439	UP	-0.532888	0.000802334	0.0142724	UP	22.3518	21.165	16.8291	17.8248	10.3959	10.6527	12.3336	20.9108	13.8651	13.5902	12.9129	13.0308
XLOC_018837	SEMA6B	chr19:4542493-4586438	-1.12019	5.77316e-15	2.32513e-12	UP	-0.399709	0.00429474	0.0484324	UP	20.8561	21.3925	20.2945	18.5103	8.44804	9.08455	10.1049	9.51549	13.7756	16.242	15.2421	15.6533
XLOC_018838	C19orf10	chr19:4639343-4670444	-0.610441	0.000431531	0.00895284	UP	-0.543874	0.0018331	0.0263397	UP	39.0352	40.8173	30.586	31.0268	20.9213	21.7678	23.6691	25.2769	24.41	25.2549	24.219	22.3619
XLOC_018847	LONP1	chr19:5691844-5720176	-0.580404	1.8825e-05	0.000771278	UP	-0.397824	0.00259629	0.0337994	UP	48.9198	47.3016	39.8436	38.8516	27.3729	27.1118	30.4792	29.9612	33.658	34.3472	30.839	32.4273
XLOC_018862	TUBB4A	chr19:6494329-6502330	-0.782924	4.73257e-07	3.51201e-05	UP	-0.641341	7.23972e-05	0.00228994	UP	10.123	10.2892	7.2036	7.66567	4.62273	4.79997	5.56808	5.37351	5.65399	6.1853	5.44945	5.13486
XLOC_018865	C3	chr19:6677802-6720662	-0.873341	0.00035251	0.00767217	UP	-0.928312	0.000662056	0.0123434	UP	1.13416	1.18101	1.11116	0.950336	0.485792	0.576128	0.583742	0.701904	0.446184	0.573129	0.641635	0.602752
XLOC_018867	SH2D3A	chr19:6751954-6767752	-1.07077	1.80378e-07	1.53648e-05	UP	-1.23797	3.72284e-08	3.92464e-06	UP	4.88472	4.99401	3.35762	4.24224	1.76895	1.91277	2.12666	2.39481	1.9041	1.96732	1.71617	1.71611
XLOC_018873	INSR	chr19:7112265-7294011	-0.849848	6.39935e-10	1.05343e-07	UP	-0.449069	0.000672073	0.0124769	UP	14.1218	15.9575	14.5045	14.3408	7.00188	7.78186	8.76325	9.07486	9.27565	11.1822	11.9586	10.7479
XLOC_018889	ADAMTS10	chr19:8645088-8675879	-0.689561	0.000581211	0.0112403	UP	-1.03511	2.52495e-06	0.000147525	UP	2.00575	1.93321	1.9846	2.13447	1.45635	1.12208	1.24779	1.15189	0.966116	0.977918	0.955113	1.00743
XLOC_018891	ZNF558	chr19:8918892-8943173	-2.84648	0	0	UP	-1.5651	5.18763e-12	1.30423e-09	UP	3.45544	3.81725	4.44726	3.53323	0.525841	0.572987	0.397725	0.627307	1.25873	1.30015	1.43805	1.18548
XLOC_018892	MUC16	chr19:8959519-9096304	-1.11282	4.14488e-08	4.29318e-06	UP	-1.32627	7.06837e-09	8.99451e-07	UP	0.236976	0.25688	0.257062	0.22022	0.101614	0.106095	0.118625	0.122163	0.0935336	0.101815	0.100758	0.0914768
XLOC_018900	ZNF560	chr19:9575587-9609452	-0.740248	3.56173e-05	0.00128034	UP	-2.26036	0	0	UP	6.28293	6.83563	5.25636	5.23302	2.61095	2.94446	3.95561	4.57182	1.27233	1.28488	1.09823	1.3032
XLOC_018921	AP1M2	chr19:10683346-10698713	-0.765506	7.00831e-08	6.73756e-06	UP	-0.60936	1.76336e-05	0.000730034	UP	36.2777	37.8487	25.3826	28.2659	14.8779	16.1691	19.6989	23.235	20.3645	22.8742	20.5742	19.501
XLOC_018936	ELOF1	chr19:11663857-11670051	-0.705125	1.41706e-06	9.01488e-05	UP	-0.455756	0.00215964	0.0295494	UP	40.227	37.7749	27.2483	29.5706	19.0752	18.9776	22.6173	22.1035	25.5333	26.1404	22.9769	23.071
XLOC_018992	SLC1A6	chr19:15060905-15090888	-0.60557	0.00115136	0.0186414	UP	-0.569791	0.00291425	0.036724	UP	11.7155	11.7962	9.6895	10.0573	7.03838	6.87377	7.44406	7.1612	6.99633	7.69878	7.00045	7.24819
XLOC_018997	RASAL3	chr19:15562437-15575458	-2.22771	2.37168e-05	0.000932998	UP	-1.61176	0.00113638	0.0185141	UP	0.227792	0.255415	0.152401	0.206127	0.0363439	0.040658	0.0421121	0.0579708	0.0705374	0.0832383	0.063127	0.0563862
XLOC_019039	TMEM161A	chr19:19225716-19249312	-0.676779	2.41048e-06	0.000141836	UP	-0.41721	0.00388808	0.045162	UP	22.5139	24.942	22.0347	22.8757	14.628	13.2231	15.4198	14.1104	15.3965	18.3153	17.645	17.2939
XLOC_019060	ZNF100	chr19:21893793-21950568	-0.467284	0.00347731	0.0416664	UP	-0.620323	0.000153648	0.00410548	UP	7.38553	8.27339	6.98694	7.11599	5.05851	5.10699	5.53633	5.98886	4.4997	4.9744	5.18173	4.85066
XLOC_019137	PPP1R14A	chr19:38740356-38747578	-0.755531	0.000425406	0.00886162	UP	-0.798545	0.000764231	0.0137787	UP	6.77065	7.2787	5.3914	5.39015	3.28357	3.74477	3.77737	3.6455	3.37498	4.12606	3.41143	3.14193
XLOC_019190	ATP1A3	chr19:42470733-42498464	-0.912726	1.45642e-09	2.22529e-07	UP	-0.712413	2.12892e-06	0.000127071	UP	18.4486	20.2357	16.9959	18.5013	9.2341	9.34182	10.4678	10.0021	10.3309	12.2453	11.3638	11.0014
XLOC_019266	PNMAL1	chr19:46969747-46974820	-0.425557	0.00298646	0.0373661	UP	-0.573575	9.84228e-05	0.00290596	UP	12.5904	12.6671	10.7489	9.45189	7.50997	8.03916	8.57793	9.26752	7.67564	7.725	7.88289	7.20834
XLOC_019281	MEIS3	chr19:47906378-47924122	-0.856138	2.25831e-06	0.000133735	UP	-0.763565	3.91545e-05	0.00138588	UP	10.0236	10.1105	8.13061	8.31353	5.02272	4.9432	4.89756	5.13834	5.27892	5.23976	5.6093	5.18492
XLOC_019301	FUT1,IZUMO1,RASIP1	chr19:49223833-49261582	-0.744166	5.21091e-05	0.00175316	UP	-0.570712	0.00202762	0.0283012	UP	8.41455	8.84235	7.49682	7.76959	4.35549	4.41071	5.34191	5.30012	5.0631	5.76202	5.609	5.38264
XLOC_019348	IZUMO2	chr19:50655802-50666538	-9.15576	1.80346e-07	1.53648e-05	UP	-1.29575	0.00103877	0.0173023	UP	2.14525	2.3535	2.65272	2.24835	0.0049023	0.00799309	0	0.0020718	0.760448	1.0287	1.06298	1.00005
XLOC_019354	SYT3	chr19:51125233-51143123	-0.883063	3.79111e-07	2.9016e-05	UP	-0.551655	0.0018848	0.0267994	UP	8.6731	9.13752	7.45213	7.57412	3.89201	4.20982	4.69509	4.8025	5.35148	5.9994	5.48893	5.33147
XLOC_019357	C19orf48,SNORD88B	chr19:51287772-51322134	-0.763997	1.57364e-06	9.86092e-05	UP	-0.516108	0.000687054	0.0126751	UP	54.1334	51.5496	43.5416	44.4519	27.1835	26.2974	30.4812	29.3739	33.9143	34.9438	31.9846	33.3852
XLOC_019365	KLK6	chr19:51461885-51472929	-1.23277	2.41813e-05	0.000947225	UP	-0.850401	0.00350901	0.0419191	UP	1.64476	1.93998	1.61846	1.60697	0.675904	0.73111	0.796174	0.685825	0.87998	1.00311	1.03391	0.846073
XLOC_019391	ZNF577,ZNF649	chr19:52359055-52409992	-0.946455	9.24129e-08	8.49073e-06	UP	-0.600216	0.00053226	0.0105217	UP	27.1108	28.6863	23.99	23.0284	11.6235	12.6147	14.0461	15.1751	16.3053	18.0726	17.2583	16.6769
XLOC_019463	ZNF667	chr19:56950692-57010303	-0.623756	0.000373247	0.00802872	UP	-0.677488	0.000249214	0.00591089	UP	4.71621	5.04028	4.5494	4.26862	2.53153	2.71022	3.01923	3.72305	2.58656	3.00648	3.03303	2.99298
XLOC_019837	MYCN	chr2:16080019-16088228	-0.83646	1.99893e-08	2.2472e-06	UP	-0.469377	0.00149831	0.0226924	UP	44.3495	45.0471	35.2817	37.8745	20.9459	21.435	24.1291	24.2824	28.6103	30.8587	28.1132	29.2763
XLOC_019838	VSNL1	chr2:17702860-17837706	-0.576824	8.61526e-05	0.00261439	UP	-0.565361	0.000101237	0.00297211	UP	24.907	25.504	15.8307	18.8952	11.9933	12.8159	14.4482	18.0595	15.3305	16.0131	13.0283	13.3692
XLOC_019845	GDF7	chr2:20866423-20871250	2.82787	0.00189952	0.0269532	DOWN	2.89433	0.00172438	0.0252631	DOWN	0.0103057	0.009549	0.0113344	0.00566555	0.112133	0.0355542	0.0396371	0.0539692	0.0760484	0.0514215	0.0718469	0.0695163
XLOC_019869	EMILIN1	chr2:27301434-27309271	-0.693776	0.000264756	0.0061745	UP	-0.647097	0.00184723	0.0264738	UP	1.90298	1.984	2.21642	2.03761	1.45215	1.21462	1.18182	1.14412	1.25875	1.26064	1.27099	1.35578
XLOC_019899	LBH	chr2:30454396-30482899	-0.702656	1.91256e-06	0.000116247	UP	-0.611588	5.60682e-05	0.0018607	UP	10.5424	11.1149	8.30331	8.14988	5.1376	5.65337	6.01661	6.61089	5.9567	6.98303	6.29159	5.71977
XLOC_019919	QPCT	chr2:37571550-37600493	-0.765785	2.46036e-05	0.000961501	UP	-1.13741	2.59246e-08	2.83008e-06	UP	4.78077	6.11838	5.09817	4.72006	2.44727	2.81922	3.11955	3.81536	1.84943	2.69561	2.64808	2.24775
XLOC_019954	EPCAM	chr2:47596286-47614167	-0.764114	3.55028e-08	3.78116e-06	UP	-0.600932	7.85374e-06	0.00037898	UP	104.043	124.854	82.5186	95.7383	51.4077	56.2629	64.4729	66.9904	64.2031	75.862	66.4466	62.361
XLOC_019985	B3GNT2	chr2:62420798-62499746	-0.733502	6.28223e-06	0.000317003	UP	-0.562805	0.000363045	0.00786022	UP	23.2184	25.8523	21.7158	20.3512	11.4926	13.2753	14.6739	15.6953	14.1187	16.7497	16.6261	14.466
XLOC_020039	ACTG2	chr2:74119509-74146780	-1.46898	3.56884e-08	3.79606e-06	UP	-1.46255	1.49276e-06	9.46112e-05	UP	3.15594	3.97934	1.65108	2.8741	0.980069	0.930257	1.15031	1.13151	1.1017	1.2318	0.945987	0.944673
XLOC_020064	TMSB10	chr2:85131502-85135095	-0.574171	3.14633e-05	0.001169	UP	-0.437498	0.00106308	0.0176047	UP	536.821	549.978	430.597	416.994	300.047	303.239	331.236	351.267	357.522	374.667	347.561	335.258
XLOC_020070	MAT2A	chr2:85764589-85789527	-0.712249	2.50472e-05	0.000974247	UP	-0.547716	0.000448567	0.009239	UP	101.058	104.734	92.9953	104.318	65.2352	58.3831	63.6085	58.7145	65.5111	70.7571	69.261	71.2912
XLOC_020084	RGPD1,RGPD2	chr2:87140934-87248973	2.29046	6.66134e-16	3.1224e-13	DOWN	3.0247	0	0	DOWN	0.131748	0.157748	0.13591	0.138967	0.706307	0.668674	0.708445	0.692593	1.09356	1.17344	1.19469	1.16828
XLOC_020086	LINC00152	chr2:87754638-87821569	-2.22145	1.28514e-08	1.52318e-06	UP	-2.08185	3.84545e-08	4.0283e-06	UP	7.79341	7.38268	4.39608	6.98434	1.59562	1.1679	1.47051	1.48048	1.89822	1.67022	1.32086	1.37251
XLOC_020087	MIR4435-1	chr2:87883292-88000879	-1.67129	0.000908969	0.015662	UP	-1.57049	0.00441216	0.0493407	UP	0.469961	0.420614	0.315286	0.477046	0.118495	0.117014	0.147878	0.143984	0.143641	0.146139	0.121617	0.156758
XLOC_020153	POU3F3	chr2:105471951-105477503	2.54172	8.43649e-07	5.83285e-05	DOWN	3.43981	1.9118e-13	6.00813e-11	DOWN	0.0251196	0.0151563	0.0655438	0.0156073	0.291708	0.133167	0.111544	0.10715	0.364926	0.169662	0.329682	0.331595
XLOC_020185	SLC20A1	chr2:113399406-113424771	-0.782105	3.14464e-07	2.4846e-05	UP	-0.639418	1.51236e-05	0.000647111	UP	52.2112	57.4983	47.933	49.1319	28.206	28.2384	32.0986	31.9967	31.8447	35.6864	33.6583	31.8926
XLOC_020210	TMEM37	chr2:120188684-120282028	-0.90385	7.79669e-06	0.000376958	UP	-0.890454	2.79532e-05	0.00106271	UP	8.2293	8.87895	6.3883	7.30935	3.50292	3.82905	4.62488	4.58482	4.03622	4.63255	4.04707	3.88379
XLOC_020216	INHBB	chr2:121103718-121109383	-1.66521	4.1e-06	0.000221747	UP	-1.34087	0.000506907	0.0101316	UP	0.186267	0.232039	0.19291	0.177494	0.0661394	0.0642803	0.0627042	0.0542076	0.0744641	0.0815389	0.0727312	0.0805539
XLOC_020277	KIF5C	chr2:149629524-149884746	-0.409246	0.00319082	0.039138	UP	-0.486618	0.000256795	0.00604061	UP	27.5479	31.5555	26.0795	29.256	21.8203	20.9825	22.3541	21.0648	18.8506	21.347	20.6475	21.0601
XLOC_020282	TNFAIP6	chr2:152214105-152236562	-1.87028	5.05833e-09	6.74787e-07	UP	-1.17586	0.000357748	0.00776988	UP	0.847689	0.993363	0.575835	0.912847	0.204257	0.247639	0.248038	0.217536	0.367898	0.345647	0.4296	0.337591
XLOC_020289	GPD2	chr2:157291529-157447842	-0.705801	1.08125e-06	7.24609e-05	UP	-0.449144	0.00175297	0.025569	UP	13.4272	14.6402	12.3955	11.724	7.37359	7.84358	8.32535	8.73321	9.16532	10.2469	9.68077	9.36962
XLOC_020305	CSRNP3	chr2:166326071-166549386	0.584662	0.00270985	0.0348621	DOWN	0.911058	5.74607e-06	0.000294458	DOWN	0.397516	0.4251	0.454768	0.375524	0.64626	0.616562	0.580535	0.641886	0.78425	0.744477	0.825028	0.761935
XLOC_020328	CYBRD1	chr2:172378865-172414788	-0.84311	1.66577e-05	0.000700112	UP	-0.910006	1.79074e-05	0.000739525	UP	2.40458	2.54969	1.92327	2.19584	1.20392	1.21008	1.27678	1.40833	1.14162	1.27623	1.31041	1.14375
XLOC_020333	ITGA6	chr2:173289803-173371456	-0.954503	5.52257e-10	9.27501e-08	UP	-0.479342	0.000804344	0.0142986	UP	97.5914	112.834	96.3356	97.057	48.7386	51.1206	54.6273	54.4801	65.4022	79.7175	74.6876	70.8676
XLOC_020381	COL3A1,MIR3606	chr2:189839098-189877472	2.16768	0	0	DOWN	1.05852	1.01679e-05	0.000466329	DOWN	0.0720601	0.306482	0.453106	0.330234	2.2532	1.021	0.683559	1.44831	0.470847	0.463594	0.753252	0.765162
XLOC_020409	SPATS2L	chr2:201170603-201346986	-1.01643	3.44524e-12	9.04551e-10	UP	-0.780303	7.56816e-08	7.21168e-06	UP	16.3955	17.1002	9.7899	13.2758	6.23083	6.44284	7.34158	7.96606	8.27802	9.30952	7.71488	7.67558
XLOC_020417	CASP10	chr2:202047620-202094129	-0.690031	7.37855e-05	0.00232587	UP	-0.888221	1.02812e-06	6.9462e-05	UP	3.50394	3.9012	2.98261	3.8907	2.17265	2.05573	2.22019	2.40825	1.70203	2.10676	1.97248	1.95652
XLOC_020423	NOP58	chr2:203129827-203171302	-0.543955	0.000120851	0.00341096	UP	-0.39194	0.00445902	0.0496885	UP	67.1379	72.3782	56.5329	57.3566	39.9964	40.6243	45.9308	45.8354	46.2733	52.8469	46.8603	47.7643
XLOC_020445	CPO	chr2:207742258-207835985	-1.28084	0.00147371	0.022414	UP	-2.22462	0.000357608	0.00776886	UP	1.00687	0.887733	0.780852	1.0559	0.333179	0.34748	0.365541	0.48875	0.188704	0.210828	0.178182	0.220166
XLOC_020468	IGFBP2	chr2:217496735-217532077	-0.792669	1.35753e-08	1.59985e-06	UP	-0.465392	0.000535321	0.0105602	UP	186.721	182.991	165.142	160.126	95.4201	97.272	107.111	98.7014	121.654	130.462	119.819	125.811
XLOC_020471	CXCR2	chr2:218990012-219001976	-1.31691	2.87893e-05	0.00108619	UP	-0.895587	0.00303461	0.0377749	UP	1.03089	1.24977	0.85319	1.22092	0.389797	0.451423	0.522831	0.38687	0.599201	0.629011	0.533889	0.579514
XLOC_020529	ITM2C	chr2:231725931-231747890	-0.920277	3.29718e-10	5.79563e-08	UP	-0.47501	0.000619173	0.0117714	UP	190.055	197.337	143.095	153.243	80.8787	83.8851	96.0627	97.7401	121.685	135.448	120.071	112.355
XLOC_020565	MLPH	chr2:238394419-238464339	-0.933785	3.09737e-07	2.45441e-05	UP	-1.67453	3.10862e-15	1.29603e-12	UP	4.89226	4.93707	3.52887	4.33893	1.86806	2.12039	2.43528	2.64601	1.27984	1.42839	1.42265	1.35359
XLOC_020567	LRRFIP1	chr2:238529770-238692529	-0.470295	0.00270424	0.034806	UP	-0.575638	0.000254875	0.00601201	UP	22.4771	23.6041	17.2386	19.4372	14.0758	13.8738	14.908	16.3558	13.3372	14.8398	13.8096	13.3985
XLOC_020614	FAM110C	chr2:35831-46901	-1.17912	8.75968e-08	8.1658e-06	UP	-0.782893	0.000332995	0.00734244	UP	2.70073	3.17619	1.78418	2.85562	1.04512	1.13325	1.24143	1.2238	1.4814	1.76845	1.49614	1.36979
XLOC_020625	PXDN	chr2:1415363-1754307	-0.715072	8.23092e-06	0.000393822	UP	-0.505731	0.000736422	0.013384	UP	51.3413	58.0143	47.719	52.9856	32.4127	30.7944	33.3215	31.159	34.5364	40.0262	36.2191	36.3851
XLOC_020696	ADCY3	chr2:25013135-25144910	-0.685186	0.000335304	0.00738488	UP	-0.573464	0.00225977	0.030515	UP	13.8532	14.5697	12.9791	12.9304	7.97023	8.12354	8.64641	8.80343	8.71812	9.45457	9.09571	9.0737
XLOC_020712	SLC5A6	chr2:27422454-27470010	-0.778282	0.000320006	0.00714852	UP	-0.573645	0.00357124	0.0424426	UP	54.077	58.2389	46.099	50.9922	29.5458	28.5794	33.2849	30.8814	33.9489	38.0438	34.287	34.1551
XLOC_020713	SLC30A3	chr2:27476285-27489444	-2.07537	0	0	UP	-1.29046	2.31471e-09	3.36916e-07	UP	7.76397	7.66091	6.29558	6.6575	1.48807	1.71013	1.93916	1.61247	2.58434	3.06143	3.20273	2.71398
XLOC_020716	PPM1G,ZNF513	chr2:27593388-27632755	-0.592936	0.000375273	0.00805769	UP	-0.468344	0.00314806	0.0387889	UP	116.16	121.284	93.6762	98.1309	64.0162	65.9691	73.2907	76.0226	75.5245	83.9125	74.0986	75.3305
XLOC_020730	GALNT14	chr2:31133285-31361592	-0.973806	1.8322e-08	2.08233e-06	UP	-0.575979	0.00124566	0.0198426	UP	5.25747	5.71309	4.16542	4.83497	2.28992	2.31987	2.74403	2.71115	3.25067	3.78735	3.159	3.09963
XLOC_020737	FAM98A,RASGRP3	chr2:33661415-33831004	-0.541909	0.000149577	0.00402262	UP	-0.531256	0.000177822	0.00454085	UP	28.1184	29.6465	20.4592	21.5283	15.1648	15.7549	17.7921	19.8319	17.1536	19.2965	16.7028	16.0232
XLOC_020748	CYP1B1	chr2:38151797-38315372	-0.610445	0.0031103	0.0384804	UP	-0.869714	7.75032e-05	0.00241643	UP	2.32361	2.57406	2.62285	2.2608	1.51511	1.56692	1.4953	1.83861	1.1206	1.40111	1.47332	1.38215
XLOC_020751	SRSF7	chr2:38967946-38979073	-0.632711	4.10095e-05	0.00143864	UP	-0.511346	0.000590308	0.0113897	UP	113.38	110.937	92.0623	89.6015	60.6663	62.5675	67.1233	73.0228	70.3577	77.5391	69.9338	69.1997
XLOC_020768	ZFP36L2	chr2:43445932-43453745	-0.804219	3.77448e-09	5.19806e-07	UP	-0.401507	0.00261133	0.0339473	UP	33.1127	32.7542	27.3205	26.54	15.2944	15.769	19.1608	19.1619	21.2229	24.0003	23.8953	21.9021
XLOC_020877	C2orf81	chr2:74641236-74644844	-2.00911	1.15463e-14	4.37421e-12	UP	-1.58204	6.98565e-09	8.91648e-07	UP	2.77421	2.51431	2.11629	2.0552	0.451115	0.549065	0.61699	0.70182	0.745265	0.790181	0.86824	0.718094
XLOC_020917	LOC285074	chr2:87257797-87303536	-0.567226	0.000134202	0.00372007	UP	-0.466464	0.00226981	0.0306356	UP	12.7691	12.8338	10.4966	10.1155	7.13475	7.56862	7.92782	8.48561	8.28067	8.75172	8.43892	7.95847
XLOC_020919	RGPD1,RGPD2	chr2:88047605-88285309	2.42065	3.05311e-13	9.33976e-11	DOWN	3.17406	0	0	DOWN	0.162271	0.182757	0.177492	0.157535	0.899061	0.883825	0.944315	0.939453	1.51729	1.51145	1.5757	1.58929
XLOC_020943	DUSP2	chr2:96807704-96811674	-1.22657	6.17629e-09	7.98165e-07	UP	-0.882313	6.93136e-05	0.00220755	UP	3.77036	3.82776	2.9276	2.99791	1.313	1.33924	1.64453	1.48562	1.87247	1.88946	1.74212	1.78165
XLOC_020968	CHST10	chr2:101008321-101034130	-0.82178	1.94322e-08	2.19889e-06	UP	-0.415059	0.00439975	0.0492551	UP	17.4906	18.026	15.1433	15.1877	8.77137	8.79115	9.65138	9.7404	11.7053	13.106	12.5158	11.7873
XLOC_020981	FHL2	chr2:105947935-106055230	-0.830473	1.42145e-05	0.000615193	UP	-0.567585	0.00276827	0.0354488	UP	20.2821	20.3246	14.3086	15.2143	8.50932	9.42068	10.3	11.0078	11.7372	12.8996	12.0147	10.4851
XLOC_020983	UXS1	chr2:106709758-106810795	-0.969183	1.86666e-11	4.21988e-09	UP	-0.654863	5.94723e-06	0.000302339	UP	34.9851	37.4449	28.0518	30.5515	14.7961	15.7173	17.346	18.4858	20.429	22.6402	21.0048	18.98
XLOC_021002	LOC541471	chr2:111960720-112252986	-1.97139	0.000135989	0.00375082	UP	-1.93099	0.000643385	0.0121041	UP	4.63211	5.05399	2.84545	4.29167	0.994941	0.999479	1.06967	1.22859	0.967173	1.30359	0.98683	1.12461
XLOC_021028	EN1	chr2:119599746-119605759	3.47679	8.86541e-05	0.00266979	DOWN	3.32949	0.000285232	0.00652277	DOWN	0.008991	0.00208271	0.00741635	0.00556066	0.0562138	0.113247	0.0599912	0.0431717	0.116122	0.0371929	0.0338524	0.0454921
XLOC_021047	LIMS2	chr2:128395858-128439360	-1.02908	0.00176325	0.0256635	UP	-1.17972	0.00131194	0.0206265	UP	1.38512	1.50839	0.929221	1.36392	0.590578	0.588086	0.611898	0.750068	0.590846	0.52769	0.566146	0.580622
XLOC_021052	HS6ST1	chr2:129003001-129087964	-1.01007	5.30753e-12	1.32634e-09	UP	-0.558478	8.63216e-05	0.00261745	UP	28.3958	29.2585	24.479	24.1135	12.0447	12.4121	13.8549	14.0816	17.2717	18.9059	18.5197	16.8819
XLOC_021095	MCM6	chr2:136597195-136634011	-0.576137	3.06179e-05	0.00114374	UP	-0.509464	0.000132832	0.00368949	UP	54.7822	57.968	42.7245	42.2668	29.983	30.6219	33.7833	37.5873	35.3054	37.8667	33.7867	32.6381
XLOC_021099	NXPH2	chr2:139426726-139537811	-1.00892	1.68433e-07	1.44811e-05	UP	-0.639968	0.00159341	0.0237767	UP	2.80036	3.06409	2.05229	2.20753	1.09567	1.15374	1.4065	1.39986	1.63666	1.79491	1.65566	1.45454
XLOC_021111	CACNB4	chr2:152689132-152957742	-0.615548	0.00236736	0.0316179	UP	-0.650136	0.00300214	0.0374891	UP	1.15848	1.26622	1.19211	1.25288	0.864842	0.741802	0.750031	0.821439	0.691779	0.795311	0.799218	0.842191
XLOC_021151	GALNT3	chr2:166604312-166650803	-0.957303	1.85444e-07	1.57639e-05	UP	-1.81677	0	0	UP	5.32457	6.56132	4.33613	5.83648	2.41896	2.74108	2.84468	3.43099	1.41829	1.68042	1.74832	1.45692
XLOC_021270	CLK1	chr2:201717731-201730586	-1.66351	0	0	UP	-1.04768	8.86113e-09	1.10552e-06	UP	12.8283	14.2218	14.0569	14.411	4.40612	4.29926	4.59859	4.45547	5.87964	6.82897	7.09921	7.2272
XLOC_021321	IGFBP5	chr2:217536827-217560272	1.59315	0	0	DOWN	1.93827	0	0	DOWN	1.17865	0.924168	2.09663	0.906182	5.11811	4.8574	2.83233	2.59396	5.34186	3.84227	4.31791	6.07467
XLOC_021327	AAMP	chr2:219128851-219134893	-0.625499	4.15042e-06	0.000223903	UP	-0.400723	0.0027594	0.0353516	UP	58.1124	56.2939	42.9477	42.7802	29.3275	29.0327	33.716	35.5565	38.122	39.5128	36.7101	36.03
XLOC_021345	TUBA4A	chr2:220110191-220136910	-0.900342	8.79334e-07	6.04932e-05	UP	-0.796945	2.24825e-05	0.000891199	UP	20.5086	19.357	13.1553	15.4537	8.18515	8.26049	9.43241	10.49	10.4285	10.6158	8.83922	9.23158
XLOC_021346	PTPRN	chr2:220154227-220174641	-0.872332	2.63208e-05	0.00101427	UP	-1.16959	2.51858e-07	2.0486e-05	UP	2.45017	2.82127	2.23842	2.5389	1.16926	1.28401	1.4787	1.52654	0.955089	1.16136	1.24804	1.06167
XLOC_021350	CHPF	chr2:220403668-220408487	-0.913373	2.13058e-11	4.75178e-09	UP	-0.715211	1.32862e-07	1.17266e-05	UP	26.7376	28.3057	22.3091	25.4417	13.2112	12.7596	14.4807	13.8095	14.6772	17.1299	14.6118	15.5136
XLOC_021371	SLC19A3	chr2:228549819-228582750	-0.88287	1.35477e-06	8.75388e-05	UP	-0.681187	0.000362692	0.00785874	UP	2.56166	3.10189	2.31582	2.64895	1.36343	1.41394	1.44654	1.56174	1.5386	1.90702	1.62537	1.57814
XLOC_021374	DNER	chr2:230222344-230579286	-1.4744	0	0	UP	-1.11129	1.78178e-10	3.32195e-08	UP	5.14227	6.24419	3.49717	5.36857	1.58448	1.84095	1.91095	1.97534	2.07236	2.61844	2.45696	2.21494
XLOC_021410	GBX2	chr2:237069795-237086051	2.1342	7.75291e-11	1.53882e-08	DOWN	1.99868	6.07153e-09	7.85852e-07	DOWN	0.470579	0.456915	0.831687	0.402186	3.16327	2.42178	1.99519	1.76922	2.21013	1.93268	1.93299	2.47681
XLOC_021414	COL6A3	chr2:238232654-238323166	-1.09411	5.72835e-08	5.67812e-06	UP	-1.00813	1.10156e-05	0.000497422	UP	1.16665	1.39969	1.21935	1.41335	0.641766	0.559469	0.588813	0.636914	0.563184	0.717215	0.601423	0.711467
XLOC_021415	RAB17	chr2:238482964-238506775	-1.55732	0	0	UP	-2.13518	0	0	UP	37.9811	39.8196	27.8903	35.4759	9.79719	10.7518	11.8895	14.6109	7.0137	8.94952	7.69522	8.01261
XLOC_021452	PDCD1	chr2:242791986-242801070	-1.90385	1.26482e-06	8.27622e-05	UP	-1.61681	8.77575e-06	0.000415339	UP	1.01644	0.965879	0.714909	0.795534	0.19914	0.240505	0.253452	0.239447	0.259272	0.30004	0.321178	0.251581
XLOC_023187	ITPA	chr20:3190055-3204506	-0.548768	0.00045718	0.00935168	UP	-0.516715	0.00124778	0.0198664	UP	32.1695	32.9619	25.2498	25.8488	19.0762	18.2934	20.3245	20.9925	20.6144	21.5125	19.3762	19.1034
XLOC_023211	BMP2	chr20:6747930-6766500	-1.40749	7.20648e-11	1.45473e-08	UP	-0.65469	0.00254747	0.0333523	UP	2.16514	2.37196	2.12953	2.16049	0.686304	0.836728	0.910105	0.897192	1.33081	1.32185	1.61365	1.33056
XLOC_023248	INSM1	chr20:20343482-20351947	-0.850677	0.00171091	0.0251279	UP	-0.99308	0.0012655	0.0200901	UP	0.883746	0.941228	0.523555	0.74578	0.462555	0.400845	0.407295	0.438295	0.380497	0.407336	0.419041	0.35019
XLOC_023279	HM13	chr20:30102207-30170141	-0.624829	2.58114e-05	0.000997424	UP	-0.470836	0.00133614	0.0208686	UP	53.4224	58.7227	46.4714	48.8143	31.7262	31.4341	36.9033	33.9323	35.9444	40.2489	37.4986	35.6282
XLOC_023281	ID1	chr20:30193085-30194317	-1.13861	1.1251e-12	3.25244e-10	UP	-0.865229	1.02756e-07	9.34788e-06	UP	36.425	39.1809	26.7577	28.696	12.4403	12.9287	15.8716	18.0715	17.4704	19.4839	18.4905	16.0148
XLOC_023295	DNMT3B	chr20:31350006-31400861	-0.572077	0.00176416	0.0256692	UP	-0.490927	0.00328064	0.0399621	UP	306.996	309.649	222.507	247.063	167.787	164.913	191.424	197.736	192.504	208.199	183.979	183.261
XLOC_023326	MMP24	chr20:33810911-33880225	-1.16985	6.546e-07	4.64979e-05	UP	-0.893164	8.84833e-05	0.00266616	UP	10.8985	11.6484	8.71399	9.12078	3.70593	4.22195	4.93862	4.97479	4.99647	5.84932	5.81926	4.93642
XLOC_023336	MYL9	chr20:35160804-35188344	-0.83719	7.43983e-09	9.42371e-07	UP	-0.597254	2.76694e-05	0.00105353	UP	81.3822	83.7776	53.5352	62.1319	35.1551	35.5917	41.2464	42.0935	46.4698	49.2133	44.3849	43.092
XLOC_023339	RPN2	chr20:35729628-35876431	-0.652639	1.19481e-05	0.000532662	UP	-0.416128	0.00314531	0.0387704	UP	161.34	180.544	151.619	155.194	96.7194	95.5691	108.087	109.805	113.738	131.901	122.725	117.179
XLOC_023353	SLC32A1	chr20:37353104-37358015	-1.24771	0.00166639	0.0246003	UP	-1.29315	0.00360979	0.042766	UP	0.159166	0.145062	0.157118	0.133404	0.0598127	0.066626	0.0639888	0.0592229	0.0505479	0.0616762	0.0742253	0.0568691
XLOC_023366	MYBL2	chr20:42295642-42348231	-0.568078	3.81686e-05	0.00136007	UP	-0.398374	0.00282037	0.0359011	UP	70.827	70.7005	53.8003	54.4921	38.0269	37.5129	44.1193	45.1941	47.8013	50.4811	44.9887	43.9487
XLOC_023380	SEMG1	chr20:43835637-43838414	-0.724938	7.65736e-05	0.00239465	UP	-0.78644	8.62384e-05	0.00261604	UP	4.52381	5.40371	3.95632	4.36314	2.52996	2.71596	2.77814	2.96723	2.46326	2.96592	2.71457	2.45697
XLOC_023385	WFDC2	chr20:44097816-44110877	-0.894182	1.00799e-07	9.17987e-06	UP	-0.695656	7.50303e-05	0.00235616	UP	38.3391	39.4841	33.0427	33.2112	16.7605	17.5408	21.1174	21.6053	19.4737	24.586	22.2947	21.7323
XLOC_023416	SLC9A8	chr20:48427599-48514889	-0.761149	3.68996e-06	0.000202879	UP	-0.557087	0.000841473	0.0147722	UP	4.08787	4.33991	3.98431	4.22052	2.411	2.30044	2.63514	2.45203	2.66858	2.95511	2.9681	2.69845
XLOC_023417	RNF114	chr20:48552873-48574835	-0.580968	3.22608e-05	0.00119017	UP	-0.451124	0.00127717	0.0202448	UP	23.9336	24.4719	18.8554	19.653	13.3471	13.5177	15.4018	15.933	15.9114	16.8509	15.6527	15.3169
XLOC_023456	FAM217B	chr20:58508818-58523702	0.575358	0.000273905	0.00632672	DOWN	0.635817	6.32851e-05	0.00204938	DOWN	3.64539	3.75984	3.05463	3.32364	5.16986	4.90567	5.07236	5.5057	5.24343	5.61874	5.40218	5.27124
XLOC_023474	COL9A3	chr20:61447402-61493166	-0.735749	5.1987e-06	0.000269404	UP	-0.714527	5.08348e-06	0.00026459	UP	40.4426	45.275	37.6471	43.9432	25.7032	23.6567	25.4937	24.5407	22.7184	26.0129	24.9942	26.5931
XLOC_023477	SLC17A9	chr20:61583692-61601032	-0.719599	5.80745e-05	0.00191291	UP	-0.778511	1.63074e-05	0.000688354	UP	10.1836	11.0723	9.10306	10.508	6.36855	5.73477	6.35063	6.26757	5.41669	6.17239	6.1322	5.94316
XLOC_023542	SLC4A11	chr20:3206603-3226207	-0.777074	1.2118e-05	0.000539658	UP	-0.821894	7.76144e-06	0.000376352	UP	5.83524	6.14791	5.40335	6.29308	3.44641	3.22884	3.62778	3.43552	2.85976	3.50559	3.65139	3.32468
XLOC_023583	RRBP1	chr20:17594322-17664281	-0.60355	0.000112889	0.0032339	UP	-0.477968	0.00118798	0.0190851	UP	62.9313	74.5729	63.1505	66.2407	43.7395	40.9174	44.6862	45.2403	43.6183	50.6703	47.2654	48.9624
XLOC_023612	CST4	chr20:23666276-23669662	-2.91336	2.40915e-05	0.000944154	UP	-1.86443	0.00183739	0.0263829	UP	0.127043	0.255521	1.08575	0.111346	0.0648084	0.0293509	0.0474262	0.0731208	0.134764	0.0956575	0.13163	0.0842913
XLOC_023613	CST1	chr20:23728189-23731574	-2.60989	0	0	UP	-0.820399	0.00273469	0.0351054	UP	1.03499	2.96214	13.2152	2.41339	0.862078	0.571894	0.845956	0.981109	3.40302	2.20768	3.88528	1.856
XLOC_023654	AHCY	chr20:32867054-32899608	-0.572422	0.000110369	0.00317928	UP	-0.439623	0.00159571	0.023794	UP	165.625	162.148	122.584	122.138	86.0274	89.3664	99.9351	106.897	106.363	113.143	101.929	98.5975
XLOC_023685	LOC388796,SNORA71B,SNORA71C	chr20:37036863-37065373	-0.593006	0.00152057	0.0229332	UP	-1.14075	2.4835e-09	3.58341e-07	UP	36.9283	37.6004	33.7775	32.0088	20.7387	21.0317	25.0968	25.1306	15.1724	15.4414	15.6024	16.3829
XLOC_023721	SDC4	chr20:43953928-43977064	-0.801856	3.11223e-09	4.3988e-07	UP	-0.378259	0.00432746	0.0486955	UP	41.8614	43.2198	36.2421	33.7744	19.3805	21.6228	23.8086	24.6742	28.2756	32.7827	31.3984	27.6018
XLOC_023743	SULF2	chr20:46130600-46415360	-0.713311	7.1114e-05	0.00225709	UP	-0.561124	0.00152226	0.0229503	UP	10.8723	12.279	10.9437	11.0403	6.73791	6.6677	7.01483	7.0045	6.90644	8.43318	7.79319	7.30887
XLOC_023748	PTGIS	chr20:48120410-48184707	-0.769264	1.21123e-08	1.45008e-06	UP	-0.4239	0.00140885	0.0216377	UP	16.6387	17.0183	16.4508	14.2647	8.60247	9.21149	9.75197	10.1219	11.024	12.5712	12.5555	11.7623
XLOC_023749	B4GALT5	chr20:48249482-48330421	-0.63432	3.23478e-06	0.000182074	UP	-0.531098	6.11192e-05	0.00199324	UP	34.2451	35.5301	28.1985	27.9676	18.521	19.5209	21.5801	22.0276	21.958	24.0785	21.5824	19.7911
XLOC_023801	LAMA5,MIR4758	chr20:60884120-60955361	-0.810782	3.29378e-08	3.53979e-06	UP	-0.39993	0.00429141	0.0484185	UP	26.8155	28.673	26.9691	29.424	16.8229	14.6872	16.6334	15.168	18.1476	21.0729	22.029	22.628
XLOC_023826	STMN3	chr20:62271015-62287592	-0.633185	7.76148e-06	0.000376352	UP	-0.409064	0.00373728	0.0438444	UP	30.5573	29.3797	20.0395	23.4354	15.1634	15.9627	18.0103	17.0839	19.5174	20.9566	18.7587	18.0017
XLOC_024340	CBR1	chr21:37441939-37498938	-0.556001	7.78423e-05	0.00242336	UP	-0.51523	0.000282322	0.00647616	UP	48.1617	48.0599	34.3106	36.7399	24.819	26.1677	28.0258	32.4687	29.2485	32.4221	27.1821	27.0168
XLOC_024352	KCNJ6	chr21:38965689-39289135	-1.39905	0.000768703	0.0138373	UP	-2.3588	7.32489e-05	0.00231247	UP	0.272161	0.296495	0.234828	0.344536	0.113816	0.0998704	0.0948896	0.126823	0.0562922	0.0682619	0.055119	0.0464998
XLOC_024363	BACE2,MIR3197	chr21:42539437-42654639	0.995039	3.37342e-05	0.00123132	DOWN	0.996294	4.38273e-05	0.0015176	DOWN	1.37423	1.38848	1.11268	1.20174	2.44171	2.31268	2.57919	2.7671	2.22725	2.92792	2.55891	2.40932
XLOC_024365	MX2	chr21:42733949-42781407	-0.942432	8.96236e-06	0.000421874	UP	-1.42454	3.12289e-09	4.40561e-07	UP	2.97492	3.18977	2.13891	2.43229	1.26967	1.23611	1.46836	1.57203	0.925881	1.08333	1.01342	0.952659
XLOC_024366	MX1	chr21:42791537-42831204	-0.884876	2.80544e-05	0.00106427	UP	-0.777683	0.000490948	0.00986725	UP	2.90851	3.09604	2.26913	2.598	1.27237	1.39183	1.52826	1.59735	1.43807	1.76785	1.59497	1.49281
XLOC_024373	SLC37A1	chr21:43919741-44004102	-0.950836	6.85856e-10	1.12267e-07	UP	-0.852854	8.69443e-08	8.11408e-06	UP	10.575	11.1716	8.63205	9.42209	4.65233	4.63147	5.4721	5.70509	5.10078	6.01967	5.62861	5.14485
XLOC_024381	RRP1B	chr21:45079431-45115960	-0.485493	0.000409696	0.00862726	UP	-0.412105	0.00189111	0.026866	UP	36.9525	37.0837	28.6982	28.8839	21.046	21.748	24.3326	26.008	25.3552	26.2311	23.8185	23.3872
XLOC_024406	COL18A1	chr21:46823440-46963045	-0.960436	5.05891e-09	6.74787e-07	UP	-0.625009	4.41307e-05	0.00152429	UP	107.442	122.39	107.544	123.635	64.5143	54.7011	60.1909	55.9856	64.5991	79.055	73.0491	78.4039
XLOC_024454	RWDD2B	chr21:30378079-30391902	-0.70254	0.000199196	0.00495399	UP	-1.54217	8.52074e-12	2.06705e-09	UP	5.91948	6.36187	4.93185	4.79646	2.82725	3.05591	3.73044	3.91153	1.85319	2.03701	1.78573	1.90382
XLOC_024537	PLAC4	chr21:42539437-42654639	2.03426	6.79431e-06	0.000338142	DOWN	1.56981	0.000815627	0.0144377	DOWN	0.0468537	0.0490338	0.0597912	0.0623648	0.231459	0.219072	0.206205	0.238998	0.190081	0.135105	0.166259	0.157385
XLOC_024575	PTTG1IP	chr21:46269377-46293818	-0.552706	5.05641e-05	0.0017088	UP	-0.49322	0.000223407	0.00543235	UP	58.922	62.1699	51.0515	48.8397	34.9564	35.7508	39.9753	40.2452	37.272	41.8479	40.6019	37.164
XLOC_024856	TPTEP1	chr22:17082800-17129720	-0.716157	1.96734e-07	1.65876e-05	UP	-1.32584	0	0	UP	33.8369	37.7378	28.3445	32.5567	19.0362	18.5233	20.6548	22.3623	11.7463	14.1124	13.5119	13.4204
XLOC_024986	TCN2	chr22:30972611-31027097	-0.660981	0.00137649	0.0212705	UP	-0.664454	0.000996015	0.0167414	UP	36.6714	38.9268	34.5899	33.3924	20.9387	21.2549	23.9206	24.2329	21.0384	24.498	23.1205	21.655
XLOC_025015	HMOX1	chr22:35777059-35790207	-0.741069	2.51857e-06	0.000147256	UP	-0.580043	0.000384355	0.00820596	UP	15.2919	15.1777	8.25526	11.2655	6.43213	6.9101	8.24845	7.84877	8.99884	9.4148	7.40222	7.37364
XLOC_025016	MCM5	chr22:35795623-35824085	-0.708354	2.78651e-06	0.000160212	UP	-0.469486	0.00124757	0.0198664	UP	90.824	89.0726	72.7588	74.3981	47.3177	46.2588	53.4188	51.1715	59.4317	62.4332	54.6808	57.7302
XLOC_025029	CDC42EP1	chr22:37955646-37976024	-0.972515	1.53151e-08	1.78209e-06	UP	-0.627645	0.000409381	0.00862705	UP	7.53376	7.28947	6.30139	6.29202	3.19371	3.40209	3.56782	3.68846	4.41795	4.51667	4.49665	4.06771
XLOC_025057	MGAT3	chr22:39853324-39888199	-1.00628	2.88269e-09	4.11644e-07	UP	-0.591706	0.000601476	0.0115461	UP	3.3141	3.3071	3.13758	2.88176	1.4262	1.53704	1.62138	1.66321	1.85309	2.1491	2.28172	2.05474
XLOC_025072	CSDC2	chr22:41957013-41972670	-0.768946	0.00183676	0.0263784	UP	-1.20463	3.80316e-05	0.00135597	UP	0.762777	0.812664	0.719526	0.666264	0.432002	0.399842	0.44857	0.447779	0.313824	0.385307	0.320206	0.252389
XLOC_025125	CRELD2	chr22:50312282-50321186	-0.650372	6.08096e-05	0.00198549	UP	-0.480597	0.00378473	0.0442757	UP	14.4012	15.6873	11.5853	12.6206	8.13443	7.88632	9.24847	8.98552	9.58697	10.5667	9.37211	8.91444
XLOC_025153	ATP6V1E1	chr22:18041683-18111588	-0.471213	0.00156605	0.0234529	UP	-0.450685	0.00288876	0.036496	UP	32.3966	32.8527	24.8085	25.0806	18.1332	19.0728	20.8753	23.6753	21.0909	22.951	20.7576	19.1933
XLOC_025154	BID	chr22:18111625-18259664	-0.659642	0.00348978	0.0417676	UP	-0.672344	0.00291872	0.0367681	UP	10.3238	10.4469	8.06132	8.24461	5.33141	5.36748	6.23909	6.45878	5.82734	6.26828	5.52361	5.58932
XLOC_025196	ZNF280B	chr22:22838771-22863505	-0.621423	8.22217e-05	0.00252278	UP	-0.524813	0.00146107	0.022263	UP	2.93085	3.11167	2.68045	2.42707	1.70401	1.73896	1.93976	1.91031	1.92692	1.93424	1.96046	1.9645
XLOC_025237	MN1	chr22:28144264-28197486	0.510641	0.00148661	0.0225519	DOWN	0.862595	1.14635e-07	1.0282e-05	DOWN	1.37044	1.27811	1.86217	1.09369	2.25401	2.07576	1.89241	1.68412	2.5936	2.31706	2.49393	2.67269
XLOC_025242	XBP1	chr22:29190547-29196560	-0.653402	3.48541e-06	0.000193814	UP	-0.428636	0.00167084	0.0246528	UP	75.2399	81.2203	64.2408	63.1365	38.7016	42.1638	48.438	50.0386	50.7727	58.1106	53.8092	48.2417
XLOC_025246	RHBDD3	chr22:29582200-29663914	-0.862456	4.98863e-08	5.0474e-06	UP	-0.601793	0.000138931	0.00381295	UP	24.0426	24.834	22.6381	22.8951	13.0079	11.7551	14.2641	12.6568	14.1098	16.3169	15.1982	15.9613
XLOC_025304	IL2RB	chr22:37521879-37545962	-0.979141	3.44152e-05	0.00124903	UP	-0.969175	0.000402408	0.00852124	UP	0.587063	0.647642	0.670187	0.553648	0.330137	0.318997	0.310277	0.286032	0.348612	0.336089	0.306679	0.258516
XLOC_025317	TMEM184B	chr22:38615297-38669040	-0.746633	9.25974e-08	8.49827e-06	UP	-0.470843	0.00068718	0.0126751	UP	24.1858	25.012	19.9165	20.1072	12.2772	12.4425	14.1703	14.2891	15.9322	16.8464	16.1756	15.0446
XLOC_025330	PDGFB	chr22:39619605-39640957	-1.07658	3.06017e-05	0.00114365	UP	-1.26316	1.3902e-05	0.000605455	UP	1.80208	1.89024	1.21473	1.51867	0.698834	0.716578	0.739501	0.856964	0.654817	0.716677	0.60221	0.68464
XLOC_025349	PHF5A	chr22:41855720-41864708	-0.606676	1.6931e-05	0.000709085	UP	-0.403365	0.00447879	0.049824	UP	50.4702	48.8629	37.1995	37.5566	26.3164	25.7223	29.5497	31.954	33.3136	35.6147	31.7614	31.0209
XLOC_025372	TTLL12	chr22:43562627-43583153	-0.526789	0.000127311	0.00356118	UP	-0.575777	1.68094e-05	0.000705773	UP	49.7364	48.052	36.1089	37.1075	27.465	26.9544	31.6876	31.3543	29.7213	30.4992	26.329	26.8939
XLOC_025678	LINC00312,LMCD1	chr3:8249636-8639718	-0.859363	0.000117736	0.00333723	UP	-1.13933	1.69028e-06	0.00010481	UP	9.37319	9.54563	5.1769	7.1778	3.56543	4.24026	4.57441	4.68376	3.84048	3.98019	3.25455	3.05468
XLOC_025690	JAGN1	chr3:9932270-9936031	-0.711821	3.48942e-06	0.000193907	UP	-0.491317	0.00187187	0.0267163	UP	14.3319	15.0414	12.0752	10.9374	7.43412	7.51921	8.65577	8.52394	9.08282	10.2623	9.35327	8.75745
XLOC_025760	CRTAP	chr3:33154865-33260803	-0.610608	1.8303e-05	0.000752117	UP	-0.493708	0.000377898	0.00810984	UP	19.0493	20.8302	16.2548	16.3383	10.7938	11.2572	12.5199	12.8175	12.2893	14.1324	12.8123	12.3096
XLOC_025765	STAC	chr3:36421759-36593113	-0.59769	0.000780862	0.0139894	UP	-0.66466	0.000472168	0.00957569	UP	4.27304	4.65668	2.88612	3.45471	2.17601	2.41618	2.54507	2.87914	2.39677	2.61006	2.41243	2.21526
XLOC_025837	TDGF1	chr3:46615970-46639905	-0.862408	1.30521e-07	1.15569e-05	UP	-0.7202	1.93799e-06	0.000117381	UP	246.074	286.687	183.703	229.346	112.614	123.895	139.556	147.506	135.114	167.558	141.74	131.827
XLOC_025861	DAG1	chr3:49506135-49573100	-0.954154	2.68538e-10	4.82241e-08	UP	-0.512775	0.00038849	0.00828146	UP	64.1567	72.5516	66.0868	63.965	32.9914	33.0591	36.4598	34.9069	42.5232	50.556	47.1318	45.9871
XLOC_025868	SEMA3F	chr3:50187111-50227796	-0.871447	1.77347e-08	2.02669e-06	UP	-0.464152	0.00347303	0.0416513	UP	9.20198	10.1889	9.21236	9.08762	4.91591	5.00779	5.21055	5.38061	6.10875	7.06706	7.10151	6.87032
XLOC_025900	PRKCD	chr3:53195222-53226733	-0.627686	0.000162626	0.00426977	UP	-0.574636	0.000763509	0.0137737	UP	8.91192	9.05627	8.35562	7.32824	4.62921	5.13915	5.73532	5.97361	5.27816	6.05753	5.76776	5.3251
XLOC_025910	FLNB	chr3:57994040-58161173	-0.891196	1.00886e-08	1.23818e-06	UP	-0.670238	4.71213e-06	0.000248378	UP	49.9125	57.2524	45.2603	53.1948	27.3532	25.9313	28.0773	29.0951	28.8798	34.5418	32.4524	32.6614
XLOC_025926	KBTBD8	chr3:67048548-67061763	-1.06099	1.04929e-11	2.51606e-09	UP	-0.744321	3.36894e-06	0.000188602	UP	6.31236	6.88239	4.74459	5.07044	2.46608	2.68566	2.86461	3.16168	3.38022	3.78922	3.31653	3.39495
XLOC_025971	OR5H6	chr3:97928016-98044135	-1.27932	8.07487e-12	1.97622e-09	UP	-1.50284	8.80851e-13	2.58236e-10	UP	0.743665	0.751796	0.722065	0.860354	0.276851	0.301832	0.319198	0.384127	0.25759	0.273704	0.284304	0.2771
XLOC_026007	HHLA2	chr3:108021331-108097126	-0.528065	0.000682165	0.0126191	UP	-0.706912	1.87679e-05	0.000769315	UP	7.02994	7.59098	5.44785	6.71285	4.71379	4.53248	4.78309	4.59851	4.08682	4.37286	4.13557	3.90754
XLOC_026065	PDIA5	chr3:122785855-122880953	-0.626317	3.40711e-05	0.00124089	UP	-0.454045	0.00315669	0.0388572	UP	14.4899	17.2912	13.3835	14.7599	8.8656	8.93058	10.2512	10.4947	10.0098	11.8011	11.0791	10.7458
XLOC_026069	UMPS	chr3:124449212-124468302	-0.514706	0.000309335	0.00695887	UP	-0.420097	0.00393592	0.0455036	UP	10.442	10.8679	8.11398	8.37548	6.01636	6.17313	6.80207	7.47523	7.14017	7.45489	6.88021	6.86904
XLOC_026084	SEC61A1	chr3:127768420-127796118	-0.720284	5.42341e-07	3.96439e-05	UP	-0.616881	6.2208e-06	0.000314321	UP	90.9931	101.274	79.2629	86.6591	51.5562	51.1578	57.8682	56.5144	55.4392	63.8568	57.841	56.1633
XLOC_026091	CCDC48	chr3:128719607-128759684	1.5737	0.00156233	0.0234141	DOWN	1.82167	0.000380505	0.00814473	DOWN	0.0629138	0.046072	0.139809	0.0758864	0.342696	0.260051	0.185434	0.184774	0.336929	0.256615	0.315387	0.239565
XLOC_026134	C3orf72	chr3:138654779-138673140	-0.82403	0.000302902	0.00684196	UP	-0.900674	0.000261218	0.00611347	UP	1.74134	1.99848	1.05902	2.03926	0.914286	0.955781	0.978577	1.02169	0.884822	1.00444	0.84489	0.932365
XLOC_026147	ATP1B3	chr3:141594365-141649380	-0.60319	1.71831e-05	0.000716145	UP	-0.466898	0.000524813	0.0104092	UP	122.996	138.441	110.089	109.666	69.8809	75.6377	83.7832	89.0506	80.4074	96.1004	91.0206	82.287
XLOC_026156	ZIC1	chr3:147127180-147134506	1.0328	0.000181863	0.00461728	DOWN	1.4547	3.21488e-07	2.53301e-05	DOWN	0.0794667	0.104696	0.393296	0.0675782	0.502991	0.282858	0.204255	0.259135	0.504065	0.353226	0.562108	0.284194
XLOC_026168	SELT	chr3:150304121-150351675	-0.63675	1.07245e-05	0.000487546	UP	-0.465306	0.0011449	0.0185937	UP	21.8402	22.9282	16.9812	17.1467	10.6916	12.386	13.558	15.2333	14.177	15.8109	14.8987	13.0016
XLOC_026182	MME	chr3:154797315-154927361	-1.00188	1.39901e-10	2.63197e-08	UP	-0.956161	2.88144e-09	4.11644e-07	UP	9.35184	11.4186	6.80299	9.64652	4.30952	4.48874	4.6787	5.2105	4.4006	5.45845	4.82951	4.63338
XLOC_026264	EPHB3	chr3:184279586-184300196	0.727824	0.000188476	0.0047422	DOWN	0.852092	3.44042e-05	0.00124903	DOWN	0.617294	0.597318	1.09769	0.626704	1.32655	1.25582	1.25211	1.00622	1.25385	1.24418	1.28613	1.48029
XLOC_026273	DNAJB11	chr3:186253237-186304327	-0.646417	2.11164e-05	0.00084799	UP	-0.508789	0.000648269	0.0121711	UP	48.9547	53.1896	38.7193	41.2184	25.8545	27.7609	30.7856	31.4505	31.7597	34.7803	32.1377	29.4591
XLOC_026285	RTP1	chr3:186903181-186922119	-0.96218	0.000323693	0.00720953	UP	-1.02641	0.000460622	0.00941279	UP	1.63011	1.55457	1.30345	1.35255	0.584016	0.63168	0.864232	0.909169	0.747408	0.753266	0.725275	0.64109
XLOC_026319	LRRC33	chr3:196366655-196388874	-1.1666	5.51023e-09	7.23357e-07	UP	-0.963709	7.95245e-06	0.000381819	UP	2.43868	2.46735	2.25965	2.24547	1.0103	0.918817	1.13384	1.09782	1.17274	1.24505	1.16427	1.2066
XLOC_026372	NUP210	chr3:13357736-13461809	-0.549815	9.55513e-05	0.00283937	UP	-0.448092	0.000838034	0.0147368	UP	34.8491	38.9853	36.4916	38.6933	27.8267	24.0834	25.9366	23.6925	24.9273	29.407	26.2095	28.1393
XLOC_026417	OSBPL10	chr3:31702316-32049379	-0.553305	0.000956605	0.0162668	UP	-0.538592	0.0013213	0.0207352	UP	13.7821	14.8016	9.3013	11.1212	7.02461	7.46932	8.86077	9.75156	8.23808	8.87917	8.37854	8.08535
XLOC_026440	CSRNP1	chr3:39183317-39196309	-1.1999	3.10061e-09	4.3937e-07	UP	-0.675523	0.000724906	0.0132152	UP	3.67501	3.50557	3.13728	3.08565	1.28808	1.31287	1.61843	1.57612	2.01471	2.13643	2.23547	1.96019
XLOC_026454	HIGD1A	chr3:42824399-42846027	-0.445387	0.0014076	0.0216225	UP	-0.432037	0.00187474	0.0267435	UP	23.7795	24.5801	18.6073	17.9462	13.7977	15.052	16.2983	18.5009	15.8912	17.0129	15.5709	15.2223
XLOC_026462	CDCP1	chr3:45123768-45187914	-0.867627	5.22681e-08	5.26272e-06	UP	-0.523772	0.00105478	0.0175021	UP	7.79432	8.76315	6.83455	7.51812	3.40235	4.07058	4.61272	4.81557	4.92419	5.90987	5.56437	5.06855
XLOC_026463	TMEM158	chr3:45264942-45270007	-0.859546	3.15095e-08	3.40393e-06	UP	-0.515561	0.00116886	0.0188461	UP	13.3395	13.4559	10.9293	10.8194	5.49952	6.34805	7.68822	7.9586	7.91099	9.2204	9.25383	7.80724
XLOC_026472	LRRC2	chr3:46556765-46608040	-0.655197	0.000592528	0.0114192	UP	-0.603585	0.00302972	0.0377359	UP	1.77735	1.98988	1.42877	1.86211	1.14789	1.09259	1.0874	1.16573	1.10771	1.28164	1.09774	1.17038
XLOC_026508	LAMB2	chr3:49158546-49179919	-0.875143	1.11009e-10	2.13193e-08	UP	-0.559004	2.4711e-05	0.000963425	UP	19.3404	21.8082	20.832	22.5177	12.5826	10.754	11.5019	11.1648	12.288	14.9403	14.5332	15.178
XLOC_026545	RRP9	chr3:51967445-51975922	-0.53483	0.000185619	0.00468798	UP	-0.45109	0.00195519	0.0275687	UP	27.2407	26.5116	20.3988	20.8025	15.412	14.9784	17.0018	16.8992	17.8322	18.1382	16.0855	16.5999
XLOC_026558	TNNC1	chr3:52485106-52488057	-1.2129	6.40857e-07	4.56389e-05	UP	-0.72848	0.00439252	0.0491941	UP	5.00666	4.60631	4.41161	3.69148	1.73957	1.73636	1.95894	1.98087	2.51869	2.72613	2.70775	2.59243
XLOC_026610	C3orf64,TMF1	chr3:69024304-69103477	-0.628644	0.00012661	0.00354616	UP	-0.90229	5.14161e-08	5.19584e-06	UP	15.8401	18.4319	13.954	17.0521	10.5062	10.1555	10.5791	11.2257	8.30795	9.13298	8.95112	8.82405
XLOC_026620	RYBP	chr3:72423743-72495774	-0.512967	0.000161057	0.00424333	UP	-0.467088	0.000549386	0.0107602	UP	17.0393	17.8545	13.7875	13.6661	9.97945	10.5894	11.3175	12.4482	10.9689	12.3504	11.3206	10.9013
XLOC_026658	ZBTB11	chr3:101368195-101398253	-0.511807	0.00179724	0.026	UP	-0.610696	0.000258596	0.00607359	UP	4.91893	5.15444	4.56312	4.46631	3.09746	3.324	3.37268	3.64771	2.93355	3.14263	3.22085	3.26744
XLOC_026693	B4GALT4	chr3:118930588-118959752	-0.534802	0.000160825	0.00423857	UP	-0.463285	0.00137693	0.0212712	UP	21.6932	24.8197	18.7017	20.423	12.3332	14.0334	15.239	17.1985	13.9091	16.9825	16.3422	14.9589
XLOC_026694	TMEM39A	chr3:119012948-119183332	-0.610562	0.000322247	0.00718505	UP	-0.610992	0.00034281	0.00750835	UP	12.0191	13.6688	11.056	11.371	7.34688	7.45059	8.33686	8.54263	7.55259	8.12516	8.25721	7.76436
XLOC_026714	ADCY5	chr3:123001142-123168955	-1.01543	1.11358e-07	1.00097e-05	UP	-0.78862	4.31161e-05	0.0014976	UP	8.30847	8.7019	6.30502	7.54821	3.29907	3.52557	4.1186	4.18711	4.23892	4.88447	4.28453	4.32119
XLOC_026719	ITGB5	chr3:124476731-124608767	-0.702306	7.61182e-07	5.29801e-05	UP	-0.63034	5.35666e-06	0.000276381	UP	38.6726	47.0925	36.3469	37.1491	22.9008	22.4624	25.2114	26.9035	23.8555	27.2916	25.9959	25.1792
XLOC_026739	RUVBL1	chr3:127799799-127842671	-0.391757	0.00391926	0.0453952	UP	-0.414022	0.00196348	0.0276481	UP	62.776	64.0551	45.8996	46.8285	36.8695	38.8837	42.4137	46.3448	43.05	44.8385	38.4121	38.0605
XLOC_026743	RPN1	chr3:128338812-128369719	-0.696242	5.97944e-07	4.31383e-05	UP	-0.498388	0.000193947	0.0048368	UP	106.34	121.464	99.3461	103.233	62.2851	62.8838	69.4559	69.6703	70.6842	83.3464	75.9722	74.1272
XLOC_026758	PIK3R4	chr3:130279177-130466031	-0.450195	0.000979398	0.0165526	UP	-0.514697	0.000134939	0.00373055	UP	16.4817	18.9817	15.8293	16.2369	11.9242	11.7788	12.6958	13.1206	11.0418	12.7217	12.0991	11.5942
XLOC_026769	SLCO2A1	chr3:133651539-133748920	-1.25617	3.25021e-07	2.55116e-05	UP	-0.852335	0.000734292	0.0133512	UP	0.812478	1.0406	1.22643	0.948901	0.433422	0.398056	0.416003	0.432282	0.547646	0.54565	0.646906	0.49078
XLOC_026807	PLOD2	chr3:145787179-145879282	-0.496834	0.00132616	0.0207714	UP	-0.442967	0.00316674	0.0389405	UP	8.47803	10.2009	8.35041	8.90401	5.58447	6.37487	6.4396	7.20172	5.74588	6.73574	7.05489	7.05415
XLOC_026821	SERP1	chr3:150259779-150264428	-0.512361	0.000157822	0.00418601	UP	-0.461453	0.000507226	0.0101355	UP	39.9684	42.3385	31.5059	32.1952	24.0362	24.9709	26.9342	28.091	26.0778	29.3609	25.8597	25.818
XLOC_026824	SIAH2	chr3:150458835-150481304	-0.689424	3.11892e-05	0.0011609	UP	-0.521691	0.00284787	0.0361393	UP	7.00122	7.78802	5.15149	5.76587	3.29104	3.71437	4.36326	4.76797	4.46268	4.95994	4.29885	4.17445
XLOC_026839	MME	chr3:154797315-154927361	-2.14252	2.79269e-09	4.00169e-07	UP	-3.2248	1.50391e-12	4.28774e-10	UP	2.85886	3.41093	2.02058	2.82743	0.55582	0.554712	0.679129	0.741771	0.231706	0.338953	0.325629	0.305649
XLOC_026845	SSR3	chr3:155838336-156272973	-0.581794	6.27798e-05	0.00203859	UP	-0.438211	0.00175344	0.0255715	UP	59.1366	60.7515	47.2071	45.4035	31.0366	34.3159	37.7312	40.8735	39.0159	42.6996	39.9267	36.6708
XLOC_026877	RPL22L1	chr3:170582664-170588303	-0.829128	1.72843e-08	1.99168e-06	UP	-0.816749	4.36909e-08	4.49735e-06	UP	33.8186	37.7115	25.1688	29.2591	16.0824	16.392	18.2253	20.8001	17.4993	19.7754	16.9219	17.8588
XLOC_026946	MB21D2	chr3:192514604-192635950	-0.473562	0.00155624	0.0233422	UP	-0.565003	0.000291208	0.00664112	UP	7.86085	7.90052	5.48957	6.25394	4.6099	4.46331	5.11394	5.76589	4.80997	5.02376	4.42799	4.38268
XLOC_026971	TFRC	chr3:195776154-195809032	-0.752008	5.6358e-08	5.60647e-06	UP	-0.397494	0.00281178	0.0358344	UP	36.0401	43.1613	37.7215	36.5307	21.1902	21.7393	24.0147	24.518	27.1359	30.9141	29.4157	29.6044
XLOC_028257	FGFRL1	chr4:1004168-1022807	-1.22941	6.29496e-13	1.85861e-10	UP	-0.873803	5.55174e-07	4.0475e-05	UP	6.49978	7.36265	6.23365	6.37237	2.65254	2.50668	2.99075	3.07914	3.22917	4.01694	3.53399	3.46574
XLOC_028283	D4S234E	chr4:4387934-4543779	-0.792637	1.55736e-05	0.000662944	UP	-0.615641	0.000784212	0.0140313	UP	15.9694	16.0141	11.6405	12.3406	6.98069	7.52964	8.58722	9.28432	9.23002	9.85984	9.17797	8.25774
XLOC_028292	WFS1	chr4:6271407-6306839	-0.759463	1.35699e-07	1.19238e-05	UP	-0.535894	0.000148397	0.00399996	UP	13.8908	15.3043	12.9609	13.4034	7.96637	7.64565	8.79209	8.18396	8.92324	10.6545	9.65956	8.82482
XLOC_028311	CPZ,GPR78	chr4:8581963-8626103	-1.39777	2.22045e-16	1.09656e-13	UP	-0.885398	1.22577e-07	1.08883e-05	UP	18.5491	20.1947	18.0019	18.819	6.31755	6.51967	7.75581	7.90315	8.44807	10.7892	10.9283	10.3931
XLOC_028369	SLC34A2	chr4:25656693-25680412	-1.32476	4.39021e-10	7.52557e-08	UP	-0.597729	0.00282047	0.0359011	UP	2.24915	2.38981	1.73836	1.96549	0.699515	0.769049	0.95048	0.918455	1.36775	1.4586	1.36031	1.32944
XLOC_028400	UCHL1	chr4:41257173-41270446	-0.596897	0.000219564	0.00536406	UP	-0.424966	0.00449834	0.049961	UP	348.99	366.293	272.794	301.318	196.357	199.145	221.756	230.471	235.285	259.646	229.155	234.033
XLOC_028401	LIMCH1	chr4:41360065-41702510	-0.906161	1.02947e-10	1.98631e-08	UP	-2.23075	0	0	UP	14.267	15.3591	15.825	12.9359	6.85829	7.6636	8.28381	8.28066	2.90538	2.94591	3.34068	3.28328
XLOC_028411	NIPAL1	chr4:47934332-48042335	-0.960827	0.00125646	0.0199815	UP	-1.11156	0.000606	0.0115989	UP	2.40758	2.5849	2.12066	2.01657	1.12	1.02224	1.23754	1.32795	1.12163	1.12237	1.11017	0.894324
XLOC_028420	DANCR	chr4:53578509-53590847	-0.622826	6.79822e-06	0.000338142	UP	-0.60148	1.14956e-05	0.000515816	UP	142.305	149.726	103.191	119.162	77.4518	78.0829	87.7483	91.4184	84.8691	93.4871	80.4559	79.3
XLOC_028427	PDGFRA	chr4:55095263-55164412	-1.04627	0.000543085	0.0106544	UP	-1.02995	0.0020136	0.0281768	UP	0.75787	0.890273	0.702389	0.715934	0.340923	0.31752	0.402335	0.42232	0.367537	0.354498	0.389682	0.401212
XLOC_028478	AFP	chr4:74301932-74321492	-1.55773	1.26475e-05	0.000558443	UP	-1.51971	0.000476175	0.00963804	UP	3.26547	3.42081	1.47524	2.99396	0.868672	0.772219	0.932171	1.19877	1.1527	1.10689	0.779881	0.876888
XLOC_028505	ANXA3	chr4:79472741-79531605	-1.09056	1.3811e-11	3.246e-09	UP	-0.955959	1.55802e-08	1.80787e-06	UP	12.7802	14.3172	8.30332	11.334	4.1687	5.00923	5.86182	6.57027	6.14704	6.58492	5.88245	5.51033
XLOC_028520	CDS1	chr4:85498223-85578461	-0.637529	3.36647e-05	0.00123041	UP	-0.509973	0.00120055	0.0192547	UP	5.79586	6.56887	4.51305	5.30517	3.16924	3.3787	3.85699	3.99375	3.62082	4.21622	3.99843	3.83371
XLOC_028532	SPP1	chr4:88896801-88904563	-1.04648	3.78899e-10	6.60414e-08	UP	-1.69898	0	0	UP	15.5552	19.9941	12.6581	16.0908	6.6107	7.42551	7.76352	9.27322	4.64617	5.25228	4.80948	5.13902
XLOC_028535	HERC5	chr4:89299625-89427322	-0.67483	6.8725e-05	0.00219539	UP	-0.753	1.236e-05	0.000547788	UP	9.0073	9.62813	6.28045	7.22937	3.96732	4.77253	5.17991	6.16269	4.50014	5.3639	4.76195	4.50668
XLOC_028540	MMRN1	chr4:90800590-90875780	1.51535	2.13581e-07	1.77911e-05	DOWN	2.00588	4.1771e-12	1.08639e-09	DOWN	0.0800856	0.0533874	0.240068	0.0655463	0.462465	0.274825	0.235594	0.287296	0.515607	0.404729	0.507545	0.342807
XLOC_028585	LARP7	chr4:113460488-113580103	-1.35551	3.24407e-13	9.85889e-11	UP	-0.585131	0.00109403	0.0180119	UP	95.8671	113.92	112.298	117.985	41.6571	42.9706	43.2866	45.3963	61.0028	76.7826	75.9804	79.3866
XLOC_028608	FGF2	chr4:123742862-123844159	-0.951137	5.98865e-11	1.24214e-08	UP	-0.578043	3.58504e-05	0.00128705	UP	30.1415	33.2224	25.2188	28.0474	13.4917	14.7977	15.4165	17.5307	18.0949	20.8352	20.5271	19.4494
XLOC_028662	FHDC1	chr4:153856980-153901181	-0.654137	4.09784e-06	0.000221747	UP	-0.726751	5.83406e-07	4.23102e-05	UP	9.46234	9.77529	7.48782	8.69859	5.37722	5.27066	5.93139	5.82652	5.3503	5.70549	4.99917	5.30493
XLOC_028673	LRAT	chr4:155665162-155674270	-0.71863	1.07167e-07	9.67975e-06	UP	-0.467524	0.000415737	0.00870352	UP	21.4845	24.5393	19.5264	20.825	11.5628	12.0227	13.9538	15.3743	14.3293	17.1783	16.0345	15.3377
XLOC_028691	LOC100506013	chr4:165798155-165818676	-0.965864	1.7113e-12	4.79661e-10	UP	-0.620653	3.60541e-06	0.000199708	UP	45.4074	52.2757	33.1515	40.1241	17.0071	21.2665	21.9589	28.6675	25.3104	30.7725	31.4966	24.8761
XLOC_028746	KLKB1	chr4:187148671-187179625	-1.8097	0	0	UP	-0.853996	1.58524e-08	1.83433e-06	UP	13.731	15.5131	11.9365	15.0341	3.85616	3.64359	4.01788	4.67267	6.96193	8.31691	8.31172	7.76346
XLOC_028748	ZFP42	chr4:188916330-188926199	-0.631205	1.53313e-05	0.000654985	UP	-2.874	0	0	UP	75.653	78.001	57.3402	58.9803	38.7793	41.0979	46.1476	48.2324	8.49136	10.2694	9.10748	9.07035
XLOC_028792	LRPAP1	chr4:3465032-3534224	-0.63554	4.77505e-06	0.000250897	UP	-0.513785	0.000173906	0.00447665	UP	10.2991	10.5726	8.93981	8.79624	5.9859	5.97483	6.70157	6.19463	6.60667	7.18225	6.70316	6.53456
XLOC_028797	LYAR	chr4:4269428-4291896	-0.436448	0.00405952	0.0465003	UP	-0.541491	0.000493112	0.00990115	UP	28.2331	30.563	21.9623	22.591	17.1334	17.3863	19.7307	20.9198	18.4925	19.0337	16.6878	17.2197
XLOC_028800	CYTL1	chr4:5016310-5025520	-0.814442	0.000404994	0.0085605	UP	-1.0207	8.34121e-05	0.00255176	UP	4.6594	5.32276	3.78611	4.29469	2.38627	2.4186	2.52126	2.93463	1.99503	2.46112	2.36388	2.09483
XLOC_028824	WDR1	chr4:10066342-10118624	-0.552675	0.00015953	0.0042138	UP	-0.467697	0.000811827	0.0143919	UP	103.473	103.654	74.4974	80.7262	56.2605	56.8271	65.1924	66.2524	65.5286	70.4609	62.982	61.1716
XLOC_028841	PROM1	chr4:15969848-16088016	-0.735199	5.66828e-08	5.63203e-06	UP	-0.816612	9.90858e-10	1.57788e-07	UP	38.4699	43.3588	35.1187	37.3693	20.477	22.2138	24.5668	25.9038	20.0422	24.2444	22.7062	21.011
XLOC_028884	PHOX2B	chr4:41746098-41750987	4.41132	0.00204114	0.0284231	DOWN	5.03666	0.000435402	0.00901286	DOWN	0.00415472	0.00384967	0	0	0.0579307	0.0605826	0.0364081	0.0287378	0.0931255	0.0397696	0.078953	0.0700372
XLOC_028905	ERVMER34-1	chr4:53603513-53622817	-0.699083	4.97189e-06	0.000259759	UP	-0.595954	0.000164648	0.00430786	UP	14.1621	16.4245	11.9289	14.9227	8.49225	8.48054	8.78953	9.70895	8.89313	10.937	9.23338	9.02574
XLOC_028916	NMU	chr4:56461397-56503268	-0.903223	1.05211e-06	7.08265e-05	UP	-0.712216	0.000223234	0.00543132	UP	20.384	21.4837	14.6976	15.8548	7.76999	9.55832	9.85462	11.046	11.003	12.4077	10.9055	9.89597
XLOC_028955	PF4	chr4:74846710-74847715	-1.28442	1.59037e-05	0.000675611	UP	-3.07846	2.192e-11	4.87565e-09	UP	5.21827	5.52344	4.1744	5.43393	1.75044	1.94431	2.33736	2.24838	0.608432	0.754955	0.406284	0.617925
XLOC_028957	CXCL5	chr4:74861358-74864416	-0.723666	1.21122e-07	1.07938e-05	UP	-1.18086	0	0	UP	26.911	26.8931	25.1021	22.5989	13.4656	15.8596	15.6008	17.5933	10.5477	12.7393	11.1465	10.8519
XLOC_029010	ABCG2	chr4:89008321-89080449	-1.22494	6.59995e-09	8.46323e-07	UP	-1.93887	1.9984e-14	7.24015e-12	UP	1.67538	1.86705	1.1735	1.58197	0.550139	0.673627	0.712638	0.783831	0.380177	0.484022	0.418406	0.376398
XLOC_029022	UNC5C	chr4:96083539-96473094	1.26159	1.40824e-06	8.97359e-05	DOWN	1.73851	7.35514e-11	1.48113e-08	DOWN	0.0957044	0.0954942	0.235702	0.118291	0.458081	0.299808	0.242298	0.299274	0.492235	0.405554	0.509703	0.408821
XLOC_029053	PAPSS1	chr4:108534821-108641419	-0.434229	0.00135193	0.0210368	UP	-0.455279	0.000682964	0.0126254	UP	35.9104	37.2823	28.9886	28.2612	21.0658	23.6616	24.549	27.2092	23.5475	25.328	23.8014	22.7281
XLOC_029062	ELOVL6	chr4:110967001-111120574	-0.480472	0.00156056	0.023396	UP	-0.461645	0.0015654	0.0234516	UP	52.9802	59.1824	45.2337	49.2203	36.2335	35.3102	37.9017	38.9909	36.7472	41.0213	37.2032	35.7634
XLOC_029102	MIR2054	chr4:126416492-126434111	-1.94275	5.31221e-05	0.00178002	UP	-2.99357	4.37608e-06	0.000233138	UP	0.247372	0.258277	0.188482	0.297324	0.0618054	0.0594715	0.0665655	0.0900824	0.025462	0.0380789	0.0201945	0.0549699
XLOC_029110	PCDH18	chr4:138440073-138453896	-1.29526	0	0	UP	-0.681876	4.99732e-07	3.67507e-05	UP	23.0938	25.9518	22.8579	21.4808	8.77392	9.1227	10.5309	9.80599	12.57	15.4197	15.9467	14.525
XLOC_029112	SLC7A11	chr4:138948576-139163811	-0.788602	2.24883e-08	2.49767e-06	UP	-0.490595	0.000299775	0.00678426	UP	20.5776	24.5914	18.0855	21.5657	11.4448	12.1099	13.164	12.8612	14.1383	16.6223	15.3462	14.7
XLOC_029192	LOC100506085	chr4:170838911-170897053	-0.660478	5.88609e-05	0.00193557	UP	-0.859686	1.35741e-06	8.75731e-05	UP	3.06956	3.15872	2.35389	3.04119	1.9224	1.77668	1.89105	1.80677	1.55804	1.67035	1.58772	1.62804
XLOC_029222	CASP3	chr4:185548849-185570629	-0.521279	0.000381559	0.00816309	UP	-0.450571	0.00182195	0.0262325	UP	26.6777	28.9973	21.4507	21.6725	15.382	16.312	18.0512	19.7321	17.7567	19.2671	18.331	17.3346
XLOC_030087	SPOCK3	chr4:167636870-168155754	-1.63431	0.00134826	0.0209986	UP	-3.28312	2.38171e-08	2.61723e-06	UP	0.460911	0.539182	0.365332	0.581669	0.140219	0.156787	0.16345	0.166751	0.0502816	0.0510001	0.0509108	0.0478255
XLOC_030302	IRX1	chr5:3588644-3631810	11.5503	9.80501e-06	0.000452941	DOWN	12.1306	3.41397e-06	0.000190343	DOWN	0.00684371	0	3.28402e-08	0	5.26641	5.75147	7.09277	5.17146	7.92565	7.53552	9.28458	10.1328
XLOC_030311	MIR4454	chr5:7260768-7284143	-0.704939	4.58194e-06	0.000242904	UP	-1.37085	0	0	UP	6.38144	7.86948	5.77197	8.58825	4.41819	4.1577	4.40295	4.62994	2.37874	2.91426	2.90429	2.86668
XLOC_030312	ADCY2	chr5:7390752-7830349	-0.876186	5.44916e-10	9.17029e-08	UP	-0.495587	0.000400484	0.00849349	UP	9.38937	9.83459	6.48784	8.14052	4.45636	4.18928	4.53757	5.28033	5.94733	6.46883	6.12058	5.51686
XLOC_030314	MTRR	chr5:7869216-7910820	-0.584696	0.000470785	0.00955827	UP	-0.507136	0.00327174	0.0398761	UP	11.272	13.6325	11.0024	11.518	7.2849	7.55918	8.44626	8.32182	7.47695	8.91409	8.77943	8.44602
XLOC_030322	ANKRD33B	chr5:10564434-10658187	-1.18446	1.15463e-14	4.37421e-12	UP	-0.479871	0.00163074	0.0241644	UP	7.07114	7.26702	5.24651	6.32721	2.46897	2.74285	2.9306	3.28661	4.54272	5.04543	4.55363	4.43158
XLOC_030331	BASP1	chr5:17217749-17276943	-0.880987	9.73552e-11	1.90499e-08	UP	-0.405808	0.00217459	0.0296748	UP	95.368	97.3845	79.4267	72.783	42.5376	45.0755	49.6694	47.8441	63.8338	70.8907	64.0186	59.9425
XLOC_030342	SUB1	chr5:32581126-32606326	-0.46906	0.000599495	0.0115187	UP	-0.410012	0.00206892	0.0287065	UP	39.4586	41.4196	30.5074	31.1897	23.0322	25.4035	26.3671	30.2729	26.277	29.2044	27.0003	26.4262
XLOC_030348	RAI14	chr5:34649591-34835835	-0.625474	2.10582e-05	0.000846472	UP	-0.673593	1.41798e-06	9.01488e-05	UP	39.3427	43.1968	29.6893	35.7112	21.8899	22.7766	24.1023	26.5834	22.7666	24.8244	22.9507	22.4625
XLOC_030418	CDK7	chr5:68530621-68573257	-0.509825	0.000418607	0.00875035	UP	-0.438304	0.00292617	0.0368228	UP	24.3312	25.1652	19.0892	19.2469	13.2791	13.9616	15.8343	18.4671	16.191	17.1397	16.6888	14.9846
XLOC_030492	NR2F1	chr5:92919042-92929786	1.84605	6.97244e-11	1.41437e-08	DOWN	2.41989	0	0	DOWN	0.157603	0.0691728	0.453293	0.0684019	0.922019	0.612585	0.523568	0.510558	1.28561	0.80066	0.803359	0.949927
XLOC_030504	RGMB	chr5:98103868-98143131	-0.739215	8.54625e-07	5.90381e-05	UP	-0.682725	6.6514e-06	0.000332233	UP	9.79259	10.1633	10.7328	8.84801	5.96516	5.72367	6.12901	5.88323	5.94966	6.16149	6.19256	6.35695
XLOC_030566	ADAMTS19	chr5:128796102-129074376	-0.455577	0.000901617	0.0155581	UP	-0.514968	0.000154893	0.00412813	UP	14.6208	16.864	14.8433	15.0136	11.0636	10.9283	11.5394	11.3049	10.0496	11.322	10.6715	10.9261
XLOC_030597	MIR4461	chr5:134239951-134353237	-0.467696	0.00237997	0.0317403	UP	-0.430209	0.00280487	0.0357739	UP	815.905	21.9941	18.0351	21.8518	16.2188	13.8758	14.0552	12.9475	13.007	16.9356	14.3259	14.9554
XLOC_030606	WNT8A	chr5:137419386-137428736	1.99562	7.69852e-08	7.31633e-06	DOWN	1.84989	1.49802e-06	9.4729e-05	DOWN	0.326225	0.273189	0.401244	0.170588	1.21935	1.30602	1.06584	1.09382	0.857183	1.15344	1.10829	1.11892
XLOC_030655	SPINK5	chr5:147326345-147516925	-0.714649	0.00200413	0.0280822	UP	-1.21283	1.99486e-06	0.000120455	UP	2.0595	2.41443	2.30005	2.48746	1.22789	1.36802	1.53164	1.4666	0.755186	1.05757	1.00421	1.09141
XLOC_030676	TCOF1	chr5:149737043-149792499	-0.442466	0.00356638	0.0424022	UP	-0.48005	0.000894038	0.015466	UP	54.1541	53.0361	43.4847	42.7165	32.7796	32.3855	36.512	36.5509	35.1237	35.7221	32.2135	33.6976
XLOC_030677	NDST1	chr5:149864375-149941084	-0.705505	4.97452e-07	3.66208e-05	UP	-0.422484	0.00184479	0.0264526	UP	20.5162	20.9716	17.686	17.3285	11.1523	10.8226	12.462	12.3536	14.276	14.708	14.3711	13.5127
XLOC_030726	DOCK2	chr5:169064213-169510386	-0.672318	0.000769985	0.0138544	UP	-0.966656	8.97485e-06	0.000421874	UP	1.20613	1.34698	0.846196	1.04127	0.574524	0.660114	0.712209	0.791459	0.547847	0.613994	0.543156	0.560719
XLOC_030732	GABRP	chr5:170210479-170241132	-1.92695	9.7697e-10	1.55876e-07	UP	-1.75075	1.61616e-07	1.39383e-05	UP	0.698571	0.928721	0.670704	0.757028	0.164859	0.182857	0.208741	0.250608	0.158591	0.273118	0.255327	0.225422
XLOC_030742	ATP6V0E1	chr5:172410762-172461900	-0.671029	3.49419e-06	0.000194042	UP	-0.460018	0.00164133	0.0242953	UP	54.7288	57.422	41.0929	42.5727	26.5034	29.0831	33.7389	34.7293	34.8572	40.5879	34.8581	32.8924
XLOC_030773	FGFR4	chr5:176513849-176527828	-0.825042	1.00477e-08	1.23499e-06	UP	-0.694741	1.17461e-06	7.79622e-05	UP	34.3414	36.86	31.0892	31.7166	18.3257	17.4243	20.0521	19.4066	18.8717	22.2822	20.6606	20.2522
XLOC_030826	CLPTM1L	chr5:1317999-1345002	-0.701685	2.33621e-07	1.91907e-05	UP	-0.510267	0.000148495	0.00400132	UP	39.6976	42.1793	32.5046	34.1491	20.825	21.6476	24.1961	24.2972	26.0872	28.2262	25.6969	23.9713
XLOC_030828	LPCAT1	chr5:1458942-1524416	-0.727161	7.12904e-07	5.00396e-05	UP	-0.505685	0.000273914	0.00632672	UP	100.177	105.821	80.1276	83.8288	49.3422	52.7355	60.1015	61.4546	62.0183	71.0819	66.1789	60.4934
XLOC_030867	FAM134B,ZNF622	chr5:16451619-16625694	-0.644147	9.22724e-05	0.00276072	UP	-0.48481	0.00409386	0.0467968	UP	15.013	15.6721	11.717	12.2613	8.17928	8.16905	8.96957	9.18736	10.0654	10.606	9.1846	9.11043
XLOC_030890	UGT3A2	chr5:36019992-36067194	-0.625445	0.000103871	0.0030323	UP	-0.491339	0.0025074	0.032989	UP	19.3297	21.7864	17.8787	17.677	11.0635	12.1081	13.0633	13.5838	12.7008	15.0988	13.823	13.1352
XLOC_030947	PLK2	chr5:57749809-57755966	-0.922612	6.38553e-08	6.24719e-06	UP	-1.12595	1.84201e-09	2.75856e-07	UP	4.86731	5.06825	3.82806	4.32106	1.9769	2.15906	2.33171	2.9936	1.95367	2.07832	2.14914	2.10625
XLOC_030983	GCNT4	chr5:74320809-74350689	-2.16748	0	0	UP	-1.52594	8.88178e-16	3.98317e-13	UP	6.09278	7.32099	3.44859	6.41009	1.17049	1.28819	1.26071	1.53887	2.05298	2.13593	1.98928	2.00561
XLOC_030997	ARSB	chr5:78073036-78283167	-0.566009	0.000342944	0.00750929	UP	-0.495782	0.00225687	0.0304808	UP	5.97429	6.18167	5.33394	5.25388	3.62359	3.81679	3.90504	4.0917	3.80271	4.2776	4.13309	3.95597
XLOC_031002	SERINC5	chr5:79406489-79557157	-0.622404	4.26595e-05	0.00148607	UP	-0.421213	0.00370199	0.0435165	UP	33.55	37.0477	30.7405	30.212	18.6061	20.0846	22.1712	25.1929	23.0088	25.811	25.9553	23.9392
XLOC_031019	EDIL3	chr5:83236118-83693427	-0.742898	5.90906e-06	0.00030125	UP	-0.549951	0.000588195	0.0113554	UP	17.2131	22.3765	18.8059	18.6603	9.31354	11.3296	11.8133	14.0255	10.7785	14.8875	14.4875	12.9064
XLOC_031045	ELL2	chr5:95220649-95297846	-0.913105	2.74669e-10	4.92185e-08	UP	-0.630004	1.41473e-05	0.000612921	UP	7.48076	8.43401	5.95064	7.47737	3.55894	3.76053	3.90909	4.47325	4.37313	5.1645	4.85722	4.69828
XLOC_031055	SLCO4C1	chr5:101569691-101632253	-0.766325	2.29969e-07	1.8947e-05	UP	-0.804396	1.88074e-07	1.59448e-05	UP	4.89765	5.58284	4.36927	4.82078	2.70777	2.78258	2.92317	3.24662	2.67328	3.14477	2.75157	2.7561
XLOC_031070	REEP5	chr5:112196353-112259171	-0.754785	1.14787e-05	0.000515339	UP	-0.599243	0.000403705	0.00854426	UP	21.1704	23.8477	18.2842	19.3473	11.4607	11.5985	12.5273	13.7763	12.4957	15.0973	13.9878	13.4356
XLOC_031084	PPIC	chr5:122354505-122377214	-0.641754	0.0014139	0.0216911	UP	-0.64946	0.00281763	0.0358814	UP	6.16305	6.72019	4.38275	4.71041	2.88855	3.24028	3.5342	4.45656	3.2635	3.96837	3.8022	3.02222
XLOC_031144	ETF1	chr5:137841781-137878989	-0.575278	3.74986e-05	0.00133869	UP	-0.406568	0.00247314	0.0326751	UP	60.7168	63.0436	45.4025	46.7422	32.0686	34.0172	38.1124	41.2727	41.3697	44.0849	39.8507	38.2973
XLOC_031175	GNPDA1	chr5:141375916-141393003	-0.606454	1.07308e-05	0.000487565	UP	-0.442037	0.00120693	0.0193309	UP	36.2033	36.5401	26.9867	27.6935	18.496	19.2175	21.5768	24.2265	24.0854	25.2555	23.0672	21.6092
XLOC_031199	PDGFRB	chr5:149493266-149535461	-1.03658	6.2931e-11	1.29557e-08	UP	-0.592835	0.000230311	0.00556273	UP	3.51508	3.85569	3.49068	3.67944	1.88285	1.70117	1.73326	1.75195	2.29656	2.47161	2.34157	2.49747
XLOC_031215	SPARC	chr5:151040656-151066615	-0.922186	1.52434e-10	2.84838e-08	UP	-0.466248	0.000675026	0.0125177	UP	103.155	116.341	94.211	95.4034	49.8682	52.404	56.0416	57.8758	68.0131	82.3635	75.7261	70.7599
XLOC_031239	RNF145	chr5:158584383-158637061	-0.6604	1.49205e-05	0.000639409	UP	-0.423817	0.00415859	0.0472691	UP	30.9837	33.5817	28.5505	26.9685	17.3492	18.5096	19.8463	20.5667	21.9453	24.0619	22.7252	21.251
XLOC_031264	KCNMB1	chr5:169780880-170163636	-1.89012	3.34041e-05	0.00122196	UP	-1.62652	0.00098387	0.0165948	UP	0.691992	0.585243	0.455874	0.551486	0.14511	0.156981	0.164069	0.145889	0.162769	0.219506	0.186473	0.166256
XLOC_031276	STC2	chr5:172741725-172762123	-0.642959	2.74201e-06	0.000158643	UP	-0.398847	0.00271816	0.0349365	UP	26.5093	29.3677	22.8402	24.354	13.9818	16.0124	17.8949	17.7408	19.1681	20.9798	19.9367	17.984
XLOC_031298	LMAN2	chr5:176758562-176778885	-0.702666	1.99176e-07	1.67765e-05	UP	-0.435791	0.00105705	0.0175249	UP	54.9922	57.3374	46.6129	47.9114	29.6352	29.4812	33.9647	33.1076	37.3136	41.0967	37.7196	35.585
XLOC_031314	CLK4	chr5:178027362-178054294	-1.09357	5.144e-07	3.77345e-05	UP	-0.919064	6.30421e-05	0.0020447	UP	3.4593	3.85763	3.56514	4.04101	1.69868	1.69493	1.76635	1.84596	1.76706	2.07652	1.98629	2.08372
XLOC_031333	GFPT2	chr5:179727699-179780442	-0.542418	0.000536692	0.0105726	UP	-0.51611	0.000793546	0.0141525	UP	36.4013	37.3263	29.3334	33.2563	22.5012	21.4152	24.0783	24.9207	23.1534	25.5592	22.9318	23.4618
XLOC_031337	MGAT1	chr5:180217540-180237137	-0.781438	4.68471e-08	4.77484e-06	UP	-0.500406	0.000432199	0.00896222	UP	32.0299	32.927	27.4502	26.3955	16.4531	16.2183	18.0984	18.1079	20.7454	21.9925	20.9588	19.9388
XLOC_032422	RIPK1	chr6:3063299-3116917	-0.702566	2.58044e-05	0.000997424	UP	-0.619445	0.00027331	0.00631803	UP	6.57251	7.29234	5.2472	5.67533	3.52619	3.41625	3.97493	4.1984	3.91964	4.25521	4.13695	3.78203
XLOC_032436	DSP	chr6:7540457-7586946	-0.613787	1.98034e-05	0.000803819	UP	-0.461847	0.000687039	0.0126751	UP	30.8354	33.1536	33.028	27.8016	19.716	19.5326	20.2259	21.6646	21.0317	23.6844	23.1443	22.7834
XLOC_032447	PAK1IP1	chr6:10671650-10711813	-0.537917	0.000279083	0.00642286	UP	-0.464265	0.00196041	0.0276188	UP	30.9958	32.0099	22.1748	23.4333	16.3139	17.4677	19.0671	21.2847	19.8502	21.4255	18.6498	18.9185
XLOC_032448	TMEM14C	chr6:10722324-10736134	-0.573946	5.45736e-05	0.00182203	UP	-0.487969	0.000588261	0.0113554	UP	60.0098	61.7871	47.6102	43.6113	32.1777	34.1965	37.7592	39.8474	38.5179	40.9774	37.7309	34.7553
XLOC_032452	C6orf228	chr6:11094265-11141289	-0.578646	0.000242928	0.00579493	UP	-0.553397	0.000788091	0.0140703	UP	3.78555	4.00207	3.52148	3.3268	2.23149	2.33591	2.50256	2.85652	2.33482	2.63701	2.66763	2.42881
XLOC_032456	EDN1	chr6:12290528-12297427	-0.913046	0.00109189	0.0179909	UP	-1.37813	8.81815e-05	0.00265845	UP	0.912767	1.37508	1.06355	1.0283	0.500888	0.529282	0.494364	0.802145	0.407601	0.371271	0.486646	0.427295
XLOC_032475	RNF144B	chr6:18387222-18469113	-0.794643	1.10197e-05	0.000497422	UP	-0.716876	0.000191866	0.00480029	UP	2.11101	2.28921	1.18332	1.7069	0.89564	0.989779	1.10929	1.25639	1.11547	1.2587	1.016	1.07744
XLOC_032485	MRS2	chr6:24400811-24537435	-0.524529	0.00197978	0.0278209	UP	-0.625106	0.000152288	0.00408034	UP	26.33	29.2606	22.2597	23.779	15.1734	16.4056	18.2132	21.3378	15.8815	17.7078	16.9491	15.7441
XLOC_032625	HLA-DRA	chr6:32407618-32412826	-0.774977	0.00274774	0.0352347	UP	-1.00194	0.000761873	0.0137622	UP	1.40336	1.51877	0.986256	1.28686	0.685834	0.658139	0.764739	0.920663	0.522841	0.729532	0.694863	0.642096
XLOC_032646	ITPR3	chr6:33587938-33680192	-0.596096	0.000200819	0.0049839	UP	-0.504854	0.00104121	0.017322	UP	16.2534	16.9569	13.5756	15.2619	9.90897	9.43932	10.6319	10.64	10.2742	11.3687	10.9783	10.7947
XLOC_032673	PIM1	chr6:37135821-37144485	-1.09769	3.77476e-15	1.54274e-12	UP	-0.445242	0.00120675	0.0193309	UP	23.4224	23.445	22.2452	18.7687	9.17537	9.37985	10.7973	11.6721	15.4594	15.9455	16.7357	16.2258
XLOC_032718	C6orf223	chr6:43963074-43977362	-1.02755	0.000163126	0.00427882	UP	-0.977128	0.000957595	0.0162803	UP	1.04723	0.989442	0.900629	0.785209	0.41938	0.41438	0.451544	0.532722	0.501012	0.513699	0.416602	0.453357
XLOC_032748	TFAP2B	chr6:50786438-50815552	1.92095	3.57928e-05	0.00128553	DOWN	1.6483	0.000746403	0.0135372	DOWN	0.016835	0.00623565	0.157854	0.0083289	0.256979	0.163219	0.124111	0.14665	0.215982	0.0926094	0.126918	0.134207
XLOC_032802	PRSS35	chr6:84222193-84235421	-0.722263	0.000191382	0.00479269	UP	-0.734966	0.000461441	0.0094249	UP	2.86702	3.33309	2.7515	2.62873	1.54603	1.69332	1.78539	1.99159	1.63491	1.96938	1.74018	1.63331
XLOC_032843	POU3F2	chr6:99282274-99293045	1.21004	1.60883e-05	0.000681707	DOWN	2.14976	8.21565e-15	3.18514e-12	DOWN	0.220774	0.156006	0.436431	0.162614	0.686863	0.623167	0.524713	0.403784	1.28652	0.822345	1.02428	1.14259
XLOC_032852	AIM1	chr6:106808335-107116292	-0.93186	3.03675e-07	2.41329e-05	UP	-0.673254	0.000168609	0.00438383	UP	6.60242	7.37734	5.40789	6.39617	2.89009	3.21231	3.42841	3.93675	3.51995	4.42238	4.16669	4.02866
XLOC_032872	SLC16A10	chr6:111408595-111553087	-1.02214	3.76106e-06	0.000206375	UP	-0.960361	2.51932e-05	0.000978092	UP	5.69813	6.56474	4.09591	4.84484	2.27482	2.53489	2.79343	2.92015	2.59853	2.8328	2.81666	2.70659
XLOC_032897	NUS1	chr6:117996616-118031886	-0.558587	4.31414e-05	0.0014976	UP	-0.415323	0.00166817	0.0246178	UP	34.4294	38.3584	30.569	31.7041	21.996	21.8341	23.3392	25.3627	24.1832	27.5291	25.7824	24.5752
XLOC_032953	SLC35D3	chr6:137243401-137246776	-1.07681	0.000840169	0.0147587	UP	-1.83047	4.01189e-06	0.000217692	UP	0.349639	0.33459	0.290769	0.293048	0.155271	0.164148	0.0868139	0.192629	0.0740234	0.09032	0.0959093	0.0981518
XLOC_032969	AIG1	chr6:143380103-143685546	-0.963026	2.3545e-06	0.000139034	UP	-0.664945	0.000994863	0.0167356	UP	24.3131	28.6523	19.5007	23.8966	11.0819	11.8373	13.2548	13.2499	14.4697	16.8228	16.0048	13.6212
XLOC_032972	PHACTR2	chr6:143901638-144153956	-0.758631	1.84017e-07	1.56587e-05	UP	-0.497418	0.000307701	0.00692586	UP	14.3046	15.7502	12.1906	13.8786	7.79355	7.6785	8.69767	9.15793	9.26171	10.354	10.5931	9.76941
XLOC_032975	UTRN	chr6:144604853-145175155	-0.601219	2.76696e-05	0.00105353	UP	-0.470765	0.000596589	0.0114788	UP	12.9243	14.5264	10.9304	11.972	7.49433	7.95589	8.31243	9.24433	8.48153	9.32347	9.54487	9.04174
XLOC_033072	SERPINB9	chr6:2887503-2903545	-0.715968	1.40333e-07	1.22428e-05	UP	-0.803904	3.12767e-09	4.40561e-07	UP	18.4005	21.2062	18.8919	16.735	9.62313	9.86933	11.9791	14.6663	9.32688	10.9438	12.7686	10.2903
XLOC_033100	NEDD9	chr6:11183530-11382581	-0.925265	2.10688e-05	0.000846485	UP	-0.814129	0.000679	0.0125717	UP	1.9652	2.01115	1.67051	1.62057	0.998807	0.848169	0.937988	1.03332	1.28187	0.934639	0.979957	0.939916
XLOC_033124	MBOAT1	chr6:20100934-20213038	-0.529296	0.000764285	0.0137787	UP	-0.562286	0.000509662	0.0101719	UP	9.55857	10.54	8.25151	9.85757	6.41622	6.35497	6.65312	7.10651	6.12692	7.12331	6.48886	6.20762
XLOC_033171	ZNF204P	chr6:27325601-27343153	-0.650845	7.64031e-05	0.00239022	UP	-0.545491	0.00118023	0.0189949	UP	8.06883	10.7058	7.68656	10.1649	5.55019	5.41627	5.73314	6.70969	5.04244	6.84006	6.71875	6.57972
XLOC_033245	CLIC1	chr6:31698357-31704341	-0.411803	0.00249846	0.0329132	UP	-0.39882	0.00266348	0.0344687	UP	123.634	130.06	93.7776	95.8791	76.5902	76.9941	84.3609	91.7077	83.9445	92.0254	80.7957	76.8902
XLOC_033246	VARS,VWA7	chr6:31733074-31764125	-0.474079	0.000756712	0.0136808	UP	-0.427206	0.00160322	0.0238674	UP	51.3934	50.279	42.0709	41.2928	31.3052	30.826	34.8002	35.1155	34.1204	36.4366	32.2776	33.5406
XLOC_033263	HLA-DOB,TAP2	chr6:32779964-32806741	-0.707366	1.18738e-05	0.000530208	UP	-0.536783	0.00117821	0.0189682	UP	10.6721	12.2853	9.49929	10.557	5.82717	6.52869	7.26666	6.73518	6.71689	8.17618	7.41365	7.31055
XLOC_033268	HLA-DOA	chr6:32971959-32977389	-0.473573	0.000649351	0.0121832	UP	-0.405104	0.00381781	0.044556	UP	13.5226	14.4516	12.2023	11.5446	8.41822	9.14294	9.753	9.91505	8.84936	10.7876	10.1211	9.24954
XLOC_033274	WDR46	chr6:33246879-33257304	-0.575516	4.44753e-05	0.00153492	UP	-0.592286	3.09514e-05	0.00115464	UP	27.271	26.8676	20.715	21.4786	14.7321	14.4289	16.5852	17.61	16.126	16.8468	15.0488	15.3411
XLOC_033282	LEMD2,MLN	chr6:33738989-33771793	-0.760941	4.06732e-07	3.08173e-05	UP	-0.528776	0.000534449	0.0105524	UP	24.9986	25.827	23.667	22.9413	12.9399	13.4766	14.8702	15.7988	15.5158	17.9598	17.5416	16.1504
XLOC_033285	GRM4	chr6:33989622-34123399	-0.845103	2.39003e-07	1.95553e-05	UP	-0.943993	9.6435e-09	1.18707e-06	UP	8.6161	9.62989	8.49385	8.93636	4.90571	4.62628	5.16593	5.08062	4.33965	4.87109	4.55016	4.70391
XLOC_033296	SRPK1	chr6:35800810-35888957	-0.459993	0.000818635	0.0144693	UP	-0.460523	0.00055641	0.010867	UP	38.8399	41.1786	31.4302	32.0827	24.7436	24.7834	26.5386	28.3559	26.1054	28.2011	25.308	25.1877
XLOC_033317	KCNK5	chr6:39143307-39197571	-0.810966	7.38048e-08	7.07077e-06	UP	-0.757789	3.04998e-07	2.42148e-05	UP	23.1777	25.4425	20.9169	22.194	12.3137	12.356	13.465	13.8122	12.6045	14.6552	13.7675	12.9649
XLOC_033372	TNFRSF21	chr6:47199267-47277680	-0.714488	1.30848e-07	1.15735e-05	UP	-0.589542	1.093e-05	0.000494179	UP	24.6113	26.7523	21.0046	21.684	12.6907	13.8548	15.078	15.7192	14.8841	17.0116	15.9604	14.6168
XLOC_033388	TRAM2	chr6:52283084-52441862	-0.792683	3.11853e-07	2.46881e-05	UP	-0.452596	0.00282651	0.0359558	UP	9.58453	10.2412	7.85672	8.42165	4.94117	5.06772	5.51488	5.40201	6.45889	7.1217	6.61925	6.22565
XLOC_033399	GCLC	chr6:53362139-53409927	-0.650356	3.10619e-06	0.00017603	UP	-0.408003	0.00335398	0.0406181	UP	15.0076	15.7767	11.6314	12.2641	7.99197	8.22578	9.12986	9.65398	10.1997	11.204	10.2601	9.72826
XLOC_033403	BMP5	chr6:55618541-55740396	1.64016	0.00222237	0.0301572	DOWN	1.66992	0.00255863	0.0334614	DOWN	0.0571539	0.0647009	0.211337	0.060253	0.403138	0.241786	0.229761	0.349851	0.298112	0.280453	0.354369	0.317748
XLOC_033422	DPPA5	chr6:74062784-74063999	-1.25096	8.70475e-05	0.00263384	UP	-2.26916	3.17617e-08	3.42348e-06	UP	1.95787	1.91946	1.01066	1.62493	0.446527	0.695873	0.66366	0.847237	0.32591	0.377777	0.327258	0.304464
XLOC_033425	MB21D1	chr6:74104002-74162471	-0.755262	0.00054928	0.0107602	UP	-0.808128	0.000518448	0.0103101	UP	4.78845	5.42629	4.28589	4.21684	2.19275	2.58689	2.92211	3.34381	2.42049	2.94915	2.64123	2.67291
XLOC_033430	TMEM30A	chr6:75962637-75994632	-0.685845	5.72748e-07	4.1683e-05	UP	-0.422008	0.0016187	0.0240374	UP	33.8939	39.1378	32.4474	31.0856	18.8253	20.7694	22.3455	24.0902	22.9029	27.8055	27.6298	24.6286
XLOC_033439	ELOVL4	chr6:80624528-80657315	-0.628442	3.98538e-05	0.00140523	UP	-0.450909	0.00428681	0.0483828	UP	6.61297	7.94318	5.77575	6.37016	3.87592	4.26586	4.67312	4.632	4.35565	5.75654	5.07157	4.50362
XLOC_033449	SNX14	chr6:86215214-86306371	-0.540994	0.00078744	0.0140678	UP	-0.503212	0.00299317	0.0374218	UP	6.24455	7.38695	5.97229	6.14216	3.95853	4.2399	4.52825	5.03061	4.21181	4.82216	4.93556	4.31201
XLOC_033451	SNHG5,SNORD50B	chr6:86374408-86396934	-0.660385	2.13641e-05	0.000855452	UP	-0.448314	0.00316137	0.0388944	UP	289.881	308.036	217.205	236.085	144.409	157.458	172.962	188.534	191.809	216.265	181.73	180.652
XLOC_033479	FAXC	chr6:99720680-99798255	-0.639889	0.00052992	0.0104804	UP	-0.556366	0.00405023	0.0464272	UP	1.48248	1.51035	1.17171	1.27071	0.76927	0.819245	0.925395	1.01387	0.914372	0.971421	0.951756	0.888246
XLOC_033482	CCNC	chr6:99968264-100016690	-0.570745	0.000426875	0.00888289	UP	-0.508343	0.0010133	0.0169734	UP	40.9899	43.8438	33.1778	32.9291	22.1002	23.9481	26.2556	31.0274	25.8055	28.3791	27.0577	25.9019
XLOC_033561	CTGF	chr6:132269316-132272518	-1.12203	2.22045e-16	1.09656e-13	UP	-0.649681	1.12691e-06	7.50968e-05	UP	48.6993	58.0628	39.9926	48.2405	22.3683	20.8049	21.145	25.2341	29.0775	33.4759	32.5484	28.8259
XLOC_033587	OLIG3	chr6:137812678-137819314	1.4973	1.73139e-08	1.99233e-06	DOWN	1.13463	0.000169001	0.00439129	DOWN	0.416275	0.412819	0.301153	0.372964	1.06192	1.1764	1.01533	0.98037	0.863842	0.865398	0.908098	0.647821
XLOC_033589	PERP	chr6:138409641-138428660	-0.742347	4.60586e-08	4.70603e-06	UP	-0.529773	8.27206e-05	0.00253528	UP	18.2248	19.2705	17.2871	14.8297	9.15019	9.96127	11.4265	11.7309	10.95	13.0803	12.8844	11.8378
XLOC_033608	FUCA2	chr6:143732293-143833020	-0.6791	0.000207673	0.00511878	UP	-0.668287	0.000133114	0.00369485	UP	44.1263	48.7391	39.5639	39.3005	24.7498	25.7902	28.2771	29.1095	25.1767	29.8107	27.9655	25.3586
XLOC_033615	SF3B5	chr6:144413159-144416935	-0.549903	0.000159381	0.00421121	UP	-0.474507	0.00143325	0.0219311	UP	58.4202	57.9466	44.1656	46.445	31.5635	32.5667	35.8526	40.3565	36.7221	39.2981	36.4524	35.6073
XLOC_033651	EZR	chr6:159186772-159240456	-0.788769	5.95206e-08	5.87879e-06	UP	-0.613954	1.02282e-05	0.000468319	UP	132.68	142.977	116.353	123.093	69.4297	69.5905	76.5637	79.4781	79.2261	87.8479	83.7073	84.9846
XLOC_033677	T	chr6:166570843-166585105	1.35338	0.000239494	0.00573255	DOWN	1.20496	0.00219572	0.0299032	DOWN	0.10325	0.233222	0.308266	0.10795	0.509214	0.311537	0.442888	0.650543	0.466061	0.383387	0.505475	0.372882
XLOC_036002	MAFK	chr7:1570345-1596073	-1.05467	1.15961e-06	7.70901e-05	UP	-0.867585	0.00011153	0.00320402	UP	3.90301	4.02273	3.23163	3.53438	1.63203	1.64449	1.87473	1.88744	1.88486	2.04397	1.99955	2.06193
XLOC_036014	TTYH3	chr7:2671602-2704436	-0.730881	2.50887e-07	2.0427e-05	UP	-0.395258	0.00343145	0.0412519	UP	65.9701	66.8749	58.5199	57.507	36.9636	35.6166	39.5284	37.4216	44.5687	50.0311	46.4361	46.48
XLOC_036046	SCIN	chr7:12607846-12696310	-1.59989	6.34144e-06	0.00031925	UP	-2.08978	2.94334e-07	2.3458e-05	UP	0.626439	0.746992	0.459601	0.654584	0.181111	0.198461	0.22471	0.216579	0.141131	0.154001	0.168451	0.135593
XLOC_036056	AHR	chr7:17338275-17385775	-0.774247	3.44719e-06	0.000191946	UP	-0.615777	0.000453143	0.0093058	UP	2.05154	2.17922	1.64504	1.8121	1.0071	1.07895	1.13906	1.31389	1.20783	1.30803	1.29245	1.23538
XLOC_036059	ITGB8	chr7:20367965-20455509	-1.39415	2.22045e-16	1.09656e-13	UP	-0.906239	1.70998e-07	1.46863e-05	UP	2.67045	2.90188	2.84138	2.58603	0.949051	1.06019	1.08224	1.12999	1.31044	1.39758	1.68717	1.5158
XLOC_036095	CREB5	chr7:28338939-28865601	-1.1438	3.03499e-06	0.000172466	UP	-1.49589	2.24589e-07	1.8559e-05	UP	0.664316	0.791558	0.566071	0.916823	0.294274	0.356604	0.32766	0.35497	0.237774	0.21345	0.270996	0.31145
XLOC_036121	BBS9	chr7:33168915-33748560	-0.876462	0.000247401	0.00588133	UP	-1.5043	2.55151e-10	4.61195e-08	UP	13.3498	13.8662	11.3015	11.87	5.72416	6.27535	6.70229	8.79667	4.27558	4.9318	4.37532	4.3254
XLOC_036244	CLDN4	chr7:73178763-73256855	-1.94153	0	0	UP	-1.26704	5.00266e-13	1.49299e-10	UP	26.4078	27.4998	22.6419	22.5515	4.92079	5.8542	7.1527	7.87292	8.92603	11.2198	11.139	9.71156
XLOC_036251	CLIP2	chr7:73703804-73820273	-1.11314	8.88178e-16	3.98317e-13	UP	-0.842705	1.95874e-09	2.91758e-07	UP	15.1025	15.5334	14.1733	12.9194	6.10705	6.28677	6.9643	6.92912	7.63372	8.2969	8.16575	7.74041
XLOC_036275	UPK3B	chr7:76139046-76157199	-1.11299	2.17962e-06	0.00012963	UP	-1.3929	2.24556e-07	1.8559e-05	UP	4.18399	4.28187	3.34602	3.5436	1.79341	1.68569	1.92291	1.68875	1.52448	1.46198	1.32819	1.50134
XLOC_036318	MIR4652	chr7:93220999-93442061	-1.19862	2.35605e-09	3.42333e-07	UP	-1.00977	2.78194e-06	0.00016006	UP	1.86069	2.20483	1.67186	2.20638	0.908779	0.861639	0.795532	0.914484	0.828244	1.13918	1.03442	0.969257
XLOC_036322	COL1A2	chr7:94022880-94060544	-0.695181	1.81064e-06	0.000111065	UP	-0.434886	0.00161814	0.0240349	UP	60.8723	67.9428	66.407	66.0773	43.5024	39.4482	39.4588	38.6499	41.2967	51.5114	49.2612	50.8897
XLOC_036335	NPTX2	chr7:98246596-98259495	-0.928308	8.61494e-10	1.39327e-07	UP	-0.615222	5.41829e-05	0.00181117	UP	14.4202	14.4659	13.0209	12.0255	6.31209	6.95811	7.42462	7.51297	8.36419	9.37031	8.80709	8.49353
XLOC_036361	MEPCE	chr7:100026370-100031749	-0.638787	1.97443e-05	0.00080226	UP	-0.425713	0.00414115	0.047149	UP	18.8996	18.8161	14.9418	15.3566	10.3838	10.4347	11.5113	11.2565	12.5162	13.2434	12.5032	12.2351
XLOC_036365	FBXO24,PCOLCE	chr7:100136784-100205799	-1.66466	4.44089e-16	2.12973e-13	UP	-1.13941	4.09405e-09	5.60506e-07	UP	26.13	28.3952	24.3041	26.2671	7.63385	7.63684	8.56458	9.17455	10.4518	12.2316	13.0339	11.7175
XLOC_036368	POP7	chr7:100303675-100305123	-0.694566	2.12087e-06	0.000126864	UP	-0.435979	0.00338607	0.0408743	UP	41.6978	41.748	31.699	31.228	20.3867	20.6389	23.1878	24.7582	27.6849	28.4652	25.6763	25.0638
XLOC_036376	SERPINE1	chr7:100769706-100782547	-1.37775	3.07421e-12	8.14871e-10	UP	-1.62111	9.72555e-14	3.20195e-11	UP	2.94625	3.3455	2.31618	3.56074	1.11119	1.10996	1.14964	1.29798	0.904349	0.972359	1.00634	1.06671
XLOC_036380	EMID2	chr7:100942199-101203842	-1.04882	8.17483e-07	5.67084e-05	UP	-0.609314	0.00240263	0.0319655	UP	45.8592	48.2334	40.5593	42.4683	21.1271	20.0697	22.3638	21.3924	27.4823	30.8554	28.0129	28.6196
XLOC_036422	CAV1	chr7:116164838-116201239	-0.829924	0.000335789	0.00739163	UP	-1.1657	1.98507e-05	0.00080431	UP	1.69279	2.8742	1.78431	1.97841	0.940274	0.954044	1.29567	1.51278	0.83092	0.958484	0.937395	0.96938
XLOC_036427	CFTR	chr7:117113056-117308782	-1.13005	1.95822e-09	2.91758e-07	UP	-0.630715	0.001107	0.0181617	UP	1.49155	1.67839	1.53578	1.48668	0.556456	0.693499	0.726913	0.8571	0.850018	1.12032	1.05342	0.99655
XLOC_036452	SND1	chr7:127291982-127744863	-0.655543	1.57233e-05	0.000668798	UP	-0.40969	0.0041328	0.0470863	UP	109.114	113.108	92.0905	92.5385	59.2927	59.5873	66.8716	70.5438	74.4382	81.3642	74.4191	74.5584
XLOC_036464	FLNC	chr7:128470482-128499328	-1.11118	6.21725e-15	2.47991e-12	UP	-0.654181	3.80647e-06	0.000208592	UP	4.87713	5.61274	7.38374	5.71163	2.848	2.63449	2.59471	2.81826	3.34818	3.36401	3.91404	4.28053
XLOC_036491	LRGUK	chr7:133810756-133958291	-0.713875	0.00435681	0.0489395	UP	-0.816075	0.00194645	0.0274969	UP	1.4675	1.54131	1.24054	1.54361	0.911295	0.849007	0.886249	0.894636	0.785173	0.806382	0.882853	0.829862
XLOC_036495	CALD1	chr7:134463809-134658085	-0.541562	0.000327781	0.0072752	UP	-0.459768	0.00171401	0.0251689	UP	58.5264	64.9318	47.2956	53.6992	36.6709	36.3266	37.8747	42.0594	39.7282	42.9205	40.5946	40.6302
XLOC_036542	ZYX	chr7:143078359-143226815	-0.637825	0.00171836	0.025206	UP	-0.589175	0.00244443	0.0323643	UP	72.527	71.453	51.5867	57.0979	38.4006	37.0119	43.9773	41.9766	41.8748	44.582	39.8466	39.9509
XLOC_036570	ZNF398	chr7:148799875-148888247	-0.738262	4.94111e-07	3.64719e-05	UP	-0.616369	2.46309e-05	0.000961659	UP	15.0298	15.5008	11.7088	12.2202	7.33002	7.65718	8.26567	9.26073	8.80459	9.51032	8.76255	8.48561
XLOC_036578	C7orf29,LRRC61	chr7:149944300-150054603	-1.3679	5.85956e-06	0.000299166	UP	-2.39879	2.9754e-14	1.04159e-11	UP	19.3317	18.012	17.5348	14.4545	5.22231	5.98035	7.36351	8.0062	3.06979	3.5784	3.0819	3.24472
XLOC_036608	EN2	chr7:155250212-155258647	3.47864	7.646e-09	9.6614e-07	DOWN	4.37472	2.10054e-13	6.55164e-11	DOWN	0.0155168	0.00901993	0.096317	0.00803338	0.60413	0.291585	0.22331	0.21929	0.830492	0.444837	0.793224	0.480485
XLOC_036642	CARD11	chr7:2944152-3083875	-0.743258	1.3906e-06	8.90217e-05	UP	-0.864416	5.73706e-08	5.67996e-06	UP	9.80208	10.1009	6.46863	8.29524	4.5975	4.69045	5.43269	5.4769	4.58262	5.05029	4.58442	4.55831
XLOC_036659	KDELR2	chr7:6500711-6523849	-0.657823	1.55801e-06	9.79259e-05	UP	-0.524783	0.000102795	0.00300936	UP	37.5288	41.0686	32.3377	30.738	20.5525	21.5504	24.1001	24.6082	23.7392	27.635	25.0548	22.8527
XLOC_036669	ICA1	chr7:8152755-8302185	-0.692651	7.86893e-05	0.00244149	UP	-0.677415	0.000220337	0.00537977	UP	13.3743	14.2972	9.69478	11.9046	6.15187	6.85673	7.76613	9.21485	7.27057	8.01396	8.0529	7.41413
XLOC_036696	RAPGEF5	chr7:22157907-22396850	-0.819459	4.63752e-07	3.45693e-05	UP	-0.522905	0.00130518	0.0205649	UP	4.0434	4.4592	3.02443	3.87696	1.93108	2.10831	2.3094	2.38939	2.66883	2.83563	2.6523	2.59475
XLOC_036707	CYCS	chr7:25158269-25164980	-0.502541	0.000301515	0.0068162	UP	-0.412006	0.00201053	0.0281386	UP	39.762	41.3353	30.4409	31.0702	22.2316	23.8999	25.9994	29.5538	26.5955	28.9705	26.6451	25.7093
XLOC_036715	HOXA1	chr7:27132613-27135625	2.64232	0.00238821	0.0318246	DOWN	2.78509	0.00341774	0.0411355	DOWN	0.00576852	0.0122254	0.0108833	0.0166492	0.0953166	0.0739478	0.033284	0.0691071	0.11084	0.0667675	0.0603191	0.0594897
XLOC_036734	SCRN1	chr7:29959718-30029905	-0.65635	1.92737e-06	0.000116891	UP	-0.449476	0.00080143	0.0142594	UP	22.216	22.8699	19.3361	17.7788	11.1776	12.3799	13.3354	15.2006	14.3835	15.5308	15.8957	14.5221
XLOC_036754	NT5C3	chr7:33053741-33102409	-0.576736	0.000289964	0.00661668	UP	-0.481246	0.00267609	0.0345832	UP	14.3933	15.2922	12.2068	11.8759	7.86775	8.55482	9.35609	10.3474	9.92001	10.4425	9.41499	8.97463
XLOC_036767	SFRP4	chr7:37945534-37956525	2.26729	6.11865e-06	0.000309726	DOWN	2.27613	1.59823e-05	0.000677908	DOWN	0.0358233	0.0186711	0.0184683	0.0203093	0.147762	0.095806	0.116283	0.0918698	0.0846857	0.107614	0.0955401	0.172542
XLOC_036795	TBRG4	chr7:45139698-45151731	-0.513998	0.000347681	0.00759257	UP	-0.430301	0.00296584	0.0371866	UP	34.7952	34.5495	28.6377	28.1826	20.3331	19.5682	22.0956	25.2927	22.9268	24.7274	22.6542	22.7185
XLOC_036810	COBL	chr7:50934075-51386300	-1.13838	2.70362e-12	7.23575e-10	UP	-0.763181	1.56943e-06	9.84197e-05	UP	12.6105	13.3971	9.9175	10.9803	4.61042	4.98599	5.53843	5.92	6.18375	7.44757	7.22169	6.52128
XLOC_036820	CHCHD2	chr7:56169265-56174187	-2.72918	0	0	UP	-1.70272	0	0	UP	18.9416	23.2643	14.9646	17.0022	2.3656	3.43898	2.3453	2.96448	4.75135	5.9545	6.32298	5.54535
XLOC_036922	CDK6	chr7:92234234-92546899	-0.592926	5.43044e-05	0.00181451	UP	-0.481248	0.00117357	0.0189134	UP	5.73831	6.23867	5.09808	4.96299	3.54895	3.52665	3.71138	3.95803	3.89147	4.04299	4.23755	3.72066
XLOC_036926	CALCR	chr7:93049477-93204117	-1.05018	0.000974723	0.0165038	UP	-1.51912	4.72527e-05	0.00161665	UP	0.379918	0.470306	0.424498	0.392181	0.181766	0.174066	0.226016	0.227004	0.130507	0.129257	0.162722	0.159283
XLOC_036992	PLOD3	chr7:100849257-100867471	-0.680402	2.46837e-05	0.000963267	UP	-0.550513	0.00065153	0.012202	UP	14.5705	16.0228	14.3609	15.4887	9.81298	8.6581	9.74584	9.2364	9.39388	11.1002	10.0754	10.3812
XLOC_037051	FAM3C	chr7:120988904-121036422	-0.682456	1.41482e-06	9.00857e-05	UP	-0.461966	0.000720203	0.0131497	UP	36.7827	39.1728	29.7115	29.0999	18.8573	20.1254	22.3543	23.6401	24.2331	27.3043	24.8683	22.1009
XLOC_037052	AASS	chr7:121713597-121784344	-0.933314	4.6794e-07	3.48502e-05	UP	-0.632023	0.000182174	0.00462252	UP	159.938	190.986	158.528	187.482	84.6422	88.1259	93.0578	99.9014	91.6879	117.962	124.311	117.962
XLOC_037060	WASL	chr7:123314180-123389116	-0.523314	0.000138886	0.00381295	UP	-0.401288	0.00324553	0.0396168	UP	15.8725	16.3324	13.0272	12.5128	8.9192	9.68576	10.3189	11.7047	10.9196	11.4695	11.1083	10.5564
XLOC_037066	GPR37	chr7:124386113-124405681	-0.792498	7.96359e-06	0.000382132	UP	-0.850067	1.07741e-05	0.00048873	UP	2.85873	3.40802	2.62914	3.01262	1.65286	1.60481	1.68378	1.91603	1.43907	1.6477	1.85712	1.64882
XLOC_037104	AKR1B1	chr7:134127106-134143888	-0.433552	0.00138393	0.0213498	UP	-0.413581	0.00192258	0.0272246	UP	85.5028	85.8341	63.6492	65.0145	50.5179	51.8534	57.4178	59.8172	56.3673	61.7356	53.3252	52.6064
XLOC_037154	ARHGEF35	chr7:143883175-143892791	-0.452983	0.00301407	0.0376094	UP	-0.800761	9.26976e-07	6.35074e-05	UP	8.78592	9.25272	6.61561	7.74165	5.34803	5.52189	6.02287	6.51538	4.58417	5.04247	4.57648	4.4057
XLOC_037198	CNPY1	chr7:155293274-155338609	2.14231	0.00412115	0.0470108	DOWN	2.65101	0.000388453	0.00828146	DOWN	0.0331026	0.0400113	0.121939	0.0527229	0.44227	0.243809	0.146684	0.199574	0.422528	0.270699	0.524539	0.287529
XLOC_037207	PTPRN2	chr7:157331689-158380482	8.31788	1.35891e-13	4.36991e-11	DOWN	7.64605	1.34512e-11	3.17947e-09	DOWN	0.00274437	0.00254709	0.00225029	0.00793539	1.22466	1.23002	1.30612	1.13425	0.814829	0.783906	0.775824	0.700495
XLOC_038219	CLN8	chr8:1711816-1751572	-0.625344	6.7046e-05	0.00215174	UP	-0.491158	0.00162591	0.0241143	UP	7.39844	8.5107	6.73527	7.15349	4.53756	4.64029	4.91637	5.26461	5.06795	5.55491	5.50139	5.04853
XLOC_038289	SLC7A2	chr8:17354320-17428167	-0.847365	1.17939e-09	1.83582e-07	UP	-0.617731	9.37915e-06	0.000437901	UP	10.8362	12.6338	10.8601	11.0838	5.53394	6.11401	6.83897	6.9566	6.68492	7.81546	7.94489	7.29394
XLOC_038310	SLC39A14	chr8:22224761-22291640	-0.736764	1.65249e-06	0.000102929	UP	-0.577078	7.74781e-05	0.00241643	UP	94.0061	106.316	74.9019	84.1885	47.6155	50.9978	57.2403	59.9638	59.1548	67.5453	59.8131	55.2244
XLOC_038353	UBXN8	chr8:30596972-30624816	-0.676369	0.000320301	0.00714935	UP	-0.633648	0.00164257	0.0243092	UP	6.64896	7.53272	5.6772	6.49914	3.65398	3.99388	4.58207	4.2243	4.12526	4.63158	4.14243	4.19116
XLOC_038364	EIF4EBP1	chr8:37888019-37917883	-0.826458	2.10779e-09	3.10062e-07	UP	-0.596179	1.43887e-05	0.000621434	UP	109.349	109.467	69.6998	80.473	44.7644	47.3283	57.3067	57.1291	62.9581	67.3548	56.1195	54.3451
XLOC_038382	GINS4	chr8:41386605-41403824	-0.573385	2.27416e-05	0.000899323	UP	-0.495023	0.000339963	0.00746372	UP	19.5883	20.2458	16.2661	17.0474	11.8033	11.4547	12.664	13.1541	12.6931	13.5896	12.8609	12.7388
XLOC_038384	AGPAT6	chr8:41434085-41483283	-0.666262	2.37886e-06	0.000140347	UP	-0.416338	0.00249369	0.0328555	UP	15.1006	16.0349	12.8222	13.4943	8.26086	8.87934	9.32926	9.68282	10.3915	11.3578	10.8516	10.4084
XLOC_038406	MRPL15	chr8:55047780-55061074	-0.584806	3.59369e-05	0.00128904	UP	-0.431054	0.00253973	0.0332928	UP	26.9095	27.8695	20.6626	20.0615	13.8128	14.7597	16.5386	18.2862	17.7794	19.1342	17.3526	16.7334
XLOC_038457	TERF1	chr8:73919636-74005507	-0.63204	9.71964e-05	0.00287351	UP	-0.44338	0.00334944	0.0405796	UP	204.167	229.871	168.228	199.596	123.84	123.295	132.257	140.749	134.557	164.16	148.253	146.072
XLOC_038466	CRISPLD1	chr8:75896707-75946793	-0.89992	1.02279e-10	1.97802e-08	UP	-0.438827	0.00154331	0.0231961	UP	10.8207	12.8644	10.7209	11.2122	5.9619	5.88241	6.2069	6.51117	7.73962	9.17261	8.57916	8.30495
XLOC_038468	ZFHX4	chr8:77523113-77779653	0.624974	0.00101779	0.0170349	DOWN	1.14969	1.50761e-09	2.29085e-07	DOWN	0.328514	0.358146	0.715072	0.318308	0.707215	0.674948	0.60494	0.686327	0.978828	0.81426	1.0041	1.04209
XLOC_038472	STMN2	chr8:80523048-80578410	1.02861	2.32931e-05	0.000918068	DOWN	1.13523	1.21456e-05	0.000539997	DOWN	0.484812	0.390455	0.659925	0.329867	1.10713	0.996671	0.797226	0.907751	1.03376	0.967144	1.11385	1.003
XLOC_038474	FABP5	chr8:82192717-82197012	-0.503128	0.000249201	0.00591089	UP	-0.433131	0.00152148	0.0229428	UP	128.969	138.892	84.1018	99.404	69.7225	72.9851	81.5828	90.8973	86.3767	93.2435	78.0731	76.0234
XLOC_038480	CA2	chr8:86376130-86393721	-0.997484	6.70254e-07	4.74474e-05	UP	-0.897635	4.11863e-05	0.00144241	UP	3.31392	3.46218	3.27684	2.95012	1.52251	1.52991	1.65934	1.80747	1.65562	1.70085	1.84111	1.79103
XLOC_038497	PDP1	chr8:94929082-94938434	-0.713989	5.24199e-06	0.000271308	UP	-0.772032	1.70878e-06	0.000105799	UP	7.14836	7.86246	5.7578	6.53899	3.71111	3.99749	4.23878	4.86971	3.74647	4.21389	4.18969	3.97204
XLOC_038498	ESRP1	chr8:95649128-95719694	-0.643608	2.39831e-05	0.000941242	UP	-0.542446	0.000255501	0.0060187	UP	37.7141	40.9906	28.6035	32.1638	19.2382	20.489	23.9154	26.1556	22.8878	26.3204	24.3654	22.7565
XLOC_038507	PTDSS1	chr8:97251644-97398300	-0.764468	6.95085e-07	4.90056e-05	UP	-0.514668	0.000598698	0.011514	UP	41.6462	45.5009	34.2366	35.0986	20.5043	21.7651	25.0775	24.7903	27.3767	30.6617	26.8937	24.9101
XLOC_038508	SDC2	chr8:97505722-97624037	-1.08119	2.22045e-15	9.49595e-13	UP	-0.790576	7.83398e-09	9.8329e-07	UP	33.0798	36.4217	26.6725	29.3128	12.3562	14.6463	15.6194	17.1406	16.7787	19.2369	19.5581	17.4098
XLOC_038511	LAPTM4B	chr8:98783778-98864830	-0.838751	1.17142e-07	1.04842e-05	UP	-0.559579	0.000145821	0.00394721	UP	330.422	368.882	260.612	271.558	148.91	160.83	192.852	192.487	199.833	238.675	213.372	186.994
XLOC_038556	MAL2	chr8:120220241-120262417	-0.783013	1.32397e-08	1.56696e-06	UP	-0.569748	2.20744e-05	0.000878673	UP	52.5423	56.816	37.3688	43.3091	22.819	26.0111	30.1992	34.0304	31.4946	35.9434	31.8212	30.1922
XLOC_038573	ZNF572	chr8:125985538-125995796	-0.766167	0.00110731	0.0181632	UP	-0.894275	0.000835498	0.0147047	UP	1.16316	1.34856	1.13031	1.19697	0.560991	0.682401	0.756811	0.856031	0.570784	0.710773	0.671365	0.670463
XLOC_038577	TRIB1	chr8:126440897-126451258	-0.779922	7.07001e-08	6.78901e-06	UP	-0.478462	0.000971113	0.0164629	UP	14.941	15.2576	11.3725	11.7887	7.07618	7.27055	8.34443	8.47248	9.80478	10.3	9.13526	9.00651
XLOC_038583	MYC	chr8:128748221-128754979	-0.796652	2.55486e-08	2.80009e-06	UP	-0.946984	1.49734e-10	2.80426e-08	UP	20.1072	20.2957	14.3725	16.2799	9.1473	9.11757	10.7259	11.5058	9.5519	9.80174	8.5288	8.7705
XLOC_038636	CYC1	chr8:145149959-145152428	-0.620244	5.20541e-06	0.000269583	UP	-0.428423	0.00150625	0.0227628	UP	73.2227	74.3502	56.5901	57.1877	39.3981	39.5391	44.2198	45.7394	48.1543	52.0342	46.8813	45.7012
XLOC_038644	GPR172A	chr8:145575824-145587737	-0.794481	3.31024e-06	0.000185691	UP	-0.555454	0.001113	0.018224	UP	26.3515	29.0143	22.8198	24.7541	14.2086	13.5955	15.9364	15.4194	16.7203	18.4308	16.8823	17.4476
XLOC_038740	DLC1	chr8:12940871-13372429	-0.794823	0.000121183	0.00341848	UP	-0.707234	0.00177545	0.0257521	UP	0.794887	0.862851	0.943689	0.636209	0.534827	0.394141	0.392483	0.546357	0.525544	0.461288	0.528209	0.480121
XLOC_038772	LOXL2	chr8:23154409-23261722	-0.761075	2.753e-08	2.99352e-06	UP	-0.461662	0.000611495	0.0116736	UP	23.7607	26.2892	25.5149	25.1896	15.5332	14.4155	14.952	14.3952	16.0733	19.6217	18.2923	18.701
XLOC_038776	STC1	chr8:23699433-23712320	-1.10067	1.03917e-13	3.38101e-11	UP	-0.656655	1.12291e-05	0.000505222	UP	8.9639	10.0309	6.05103	7.63704	3.51238	3.93155	3.99176	3.88006	5.28302	5.15229	5.15016	5.20424
XLOC_038829	RAB11FIP1	chr8:37716464-37757015	-0.872768	7.65078e-09	9.6614e-07	UP	-0.502878	0.000895785	0.0154854	UP	12.8704	12.817	10.2636	10.3259	5.72898	5.91324	6.49066	6.96323	8.36791	8.37103	8.1277	7.85817
XLOC_038845	ANK1	chr8:41510660-41754319	-0.729361	0.00036347	0.00786533	UP	-0.672807	0.00181492	0.0261837	UP	1.89047	1.94373	1.36547	1.617	0.958592	0.994791	0.981474	1.11547	1.01897	1.15434	1.02132	1.02856
XLOC_038849	PLAT	chr8:42032235-42065194	-0.621997	0.000413189	0.00867424	UP	-0.777177	5.20196e-05	0.00175085	UP	3.58464	3.71554	3.46302	3.55391	2.63304	2.22413	2.31625	2.13291	1.92581	2.31404	1.93374	2.14849
XLOC_038887	IMPAD1	chr8:57868767-57906632	-0.428447	0.00172314	0.0252569	UP	-0.48937	0.00031252	0.00701151	UP	10.3041	10.943	9.53571	8.70174	6.74894	7.22104	7.65998	8.14734	6.85093	7.61578	7.20007	6.69613
XLOC_038898	GGH	chr8:63927638-63951610	-0.733391	1.75565e-06	0.000108216	UP	-0.719498	7.51692e-06	0.000365776	UP	14.8759	18.1722	13.2658	13.2191	8.42982	8.59352	9.0192	9.8755	8.65774	10.2794	9.18602	8.06015
XLOC_038928	TRAM1	chr8:71485452-71520694	-0.698807	2.29427e-07	1.89211e-05	UP	-0.402509	0.00230548	0.0309734	UP	36.4702	41.848	34.9598	34.0644	20.6446	22.3936	23.6955	25.0659	25.8661	29.9186	29.0375	27.4003
XLOC_038950	TPD52	chr8:80947104-81083836	-0.558806	8.17552e-05	0.00251498	UP	-0.656724	5.35198e-06	0.000276344	UP	12.3539	12.8849	9.46822	9.50239	6.2003	7.21023	7.85	9.04933	6.88647	7.4437	7.2172	6.74104
XLOC_038977	MMP16	chr8:89049459-89339717	-0.710486	2.36419e-07	1.93821e-05	UP	-0.457987	0.000842669	0.0147901	UP	8.42304	10.0352	7.89067	8.45678	4.90002	5.33831	5.40062	5.76137	5.75834	6.82736	6.47087	6.42678
XLOC_039022	FBXO43	chr8:101145587-101158099	0.848969	0.00258962	0.0337444	DOWN	0.940465	0.00162544	0.0241116	DOWN	0.615871	0.644196	0.657508	0.578808	1.31397	1.10278	1.11675	0.990599	1.09765	1.25426	1.23876	1.24698
XLOC_039033	AZIN1	chr8:103838535-103879283	-0.658411	1.58335e-05	0.000672972	UP	-0.419582	0.00395885	0.0457005	UP	86.2413	92.6988	64.4916	69.1918	43.6114	47.9859	51.7535	57.211	57.4175	64.0316	58.8769	55.7536
XLOC_039039	LRP12	chr8:105501458-105601252	-0.762132	1.08488e-06	7.25288e-05	UP	-0.504163	0.00122831	0.0196166	UP	6.02301	6.2989	6.16102	5.40581	3.32319	3.52887	3.64604	3.67162	3.95747	4.30943	4.46027	4.2362
XLOC_039063	DERL1	chr8:124025567-124054648	-0.666705	8.76259e-07	6.03317e-05	UP	-0.411281	0.00224815	0.0303977	UP	20.7728	23.5404	18.9382	18.3049	11.4148	12.1724	13.9388	14.1762	14.7101	16.6899	15.8024	14.4
XLOC_039067	ATAD2	chr8:124332088-124408991	-0.497109	0.000275013	0.00634327	UP	-0.497164	0.00041016	0.00863268	UP	9.67763	9.90818	8.98754	8.29585	6.21322	6.21628	6.75295	6.91104	6.25678	6.76548	6.70868	6.52479
XLOC_039087	ADCY8	chr8:131792546-132054590	-1.33453	3.1773e-08	3.42348e-06	UP	-1.72427	3.45534e-09	4.81299e-07	UP	1.37609	1.58521	0.924393	1.39682	0.425046	0.571282	0.488838	0.605595	0.356952	0.393967	0.430727	0.411813
XLOC_039088	HHLA1,OC90	chr8:133036466-133117512	-0.544391	0.00411102	0.0469351	UP	-2.1941	0	0	UP	10.0836	13.0495	8.38628	11.719	6.83612	6.90767	7.576	8.43387	2.14476	2.55203	2.38067	2.2596
XLOC_039127	TOP1MT	chr8:144366501-144417050	-0.547975	0.00319671	0.0391886	UP	-0.585009	0.00158759	0.0237113	UP	26.3734	26.7746	19.9492	19.6635	13.7545	13.9567	16.2709	17.0984	15.4464	16.0581	15.1572	14.3885
XLOC_040137	TEK	chr9:27109075-27231526	-1.65838	0	0	UP	-1.46909	0	0	UP	15.0896	17.0161	12.437	13.9524	4.07627	4.41839	4.77968	5.20654	4.88227	5.7734	5.5233	4.98666
XLOC_040155	ANXA2P2	chr9:33624222-33625532	-0.79698	0.000223365	0.00543235	UP	-1.11026	8.12254e-06	0.000389085	UP	2.91213	3.3274	2.39501	2.6637	1.47197	1.40883	1.45725	2.09196	1.24615	1.29754	1.48752	1.20023
XLOC_040172	ATP8B5P,UNC13B	chr9:35160142-35483026	-0.459427	0.000874327	0.0152138	UP	-0.43857	0.00125186	0.0199237	UP	15.559	15.8393	12.6553	12.579	9.37959	9.51192	10.5526	11.2768	10.304	10.8831	10.5186	9.93626
XLOC_040196	ALDH1B1	chr9:38392660-38398662	-0.518279	0.00013484	0.00372906	UP	-0.447336	0.000857233	0.0149887	UP	30.3583	31.155	23.8161	22.7552	16.6794	17.6215	19.5236	21.1629	19.8477	21.1921	19.1143	18.8886
XLOC_040236	FAM189A2	chr9:71936846-72008856	-1.19703	5.38505e-09	7.10295e-07	UP	-0.790433	0.000179415	0.00457166	UP	7.10771	7.96883	5.79156	7.48707	2.92603	2.74892	3.30717	3.34332	3.70185	4.41663	4.28362	3.90463
XLOC_040247	PCSK5	chr9:78504264-78977792	-1.04003	5.52517e-08	5.51626e-06	UP	-0.799537	4.98109e-05	0.00168747	UP	4.20058	5.27254	3.90466	4.93606	2.09885	2.04745	2.33078	2.40183	2.29306	2.95533	2.68581	2.58198
XLOC_040271	NTRK2	chr9:87283465-87638505	2.33401	3.65331e-07	2.80649e-05	DOWN	2.9815	3.52999e-08	3.76438e-06	DOWN	0.0439078	0.0207752	0.0381909	0.0219586	0.202012	0.191877	0.140491	0.0971456	0.293059	0.212824	0.191259	0.29343
XLOC_040288	GADD45G	chr9:92219925-92223548	-1.26444	2.78247e-07	2.23476e-05	UP	-0.798994	0.00184435	0.0264526	UP	3.55463	4.1422	2.65425	3.40064	1.37407	1.36906	1.52951	1.37635	1.92684	1.99756	1.9346	1.94853
XLOC_040335	ANP32B	chr9:100745012-100780293	-0.521826	0.000140176	0.00383823	UP	-0.537802	8.72632e-05	0.00263844	UP	43.3511	46.7841	38.7423	34.9087	27.0609	26.3255	26.7933	31.7557	29.3096	29.7546	27.0376	27.6637
XLOC_040440	SLC2A8	chr9:130159272-130171175	-0.616311	0.000260509	0.00610204	UP	-0.517998	0.00295271	0.03705	UP	11.2245	11.3418	9.71523	9.8348	6.68696	6.44319	7.36518	6.87736	7.10094	7.78444	7.31314	7.09742
XLOC_040456	SLC27A4	chr9:131102463-131123749	-0.517199	0.000409532	0.00862726	UP	-0.432641	0.00391915	0.0453952	UP	9.8346	10.3417	8.63679	8.63006	6.41205	6.11095	6.82824	6.65238	6.66189	7.3373	6.96842	6.5462
XLOC_040468	LRRC8A	chr9:131644390-131680317	-1.11435	8.88178e-16	3.98317e-13	UP	-0.604839	6.1129e-06	0.000309623	UP	60.3055	63.0648	48.1692	52.9016	23.7436	24.6823	27.3588	27.0228	36.3247	39.8392	34.716	35.6602
XLOC_040480	PRRX2	chr9:132427919-132484951	-1.17448	2.61337e-07	2.11533e-05	UP	-0.800717	0.000973664	0.0164994	UP	3.53312	2.64845	2.57042	2.00869	0.974997	1.2373	1.37226	1.19179	1.41157	1.65073	1.51427	1.56675
XLOC_040521	WDR5	chr9:136998810-137025126	-0.574416	4.46022e-05	0.00153866	UP	-0.413188	0.00286915	0.0363275	UP	28.2769	28.4503	22.9051	22.7592	16.0804	16.0141	18.1725	18.3045	19.344	20.5006	18.7038	18.0764
XLOC_040585	AK3	chr9:4709556-4753472	-0.473956	0.00145215	0.0221714	UP	-0.668973	7.99178e-06	0.000383263	UP	10.0501	11.1083	9.34785	10.1453	7.00278	7.07549	7.49633	7.89366	5.92643	6.74093	6.70864	6.31188
XLOC_040591	GLDC	chr9:6532463-6645692	-0.626038	4.84095e-06	0.000253557	UP	-0.633422	1.75496e-06	0.000108216	UP	47.3791	53.1779	46.3954	46.55	29.9189	30.0242	31.476	33.698	28.5331	33.714	31.0235	31.2298
XLOC_040664	NOL6	chr9:33461350-33473941	-0.591751	1.69399e-05	0.000709099	UP	-0.672421	9.54078e-07	6.51648e-05	UP	18.5229	18.2674	14.1204	15.4777	10.4666	10.0222	11.6311	11.6612	10.6917	11.0576	9.695	10.0074
XLOC_040679	SIGMAR1	chr9:34634718-34637768	-0.718671	2.08298e-07	1.7386e-05	UP	-0.450303	0.00102393	0.0171168	UP	58.9411	60.609	47.2688	46.0824	29.3275	29.7182	34.7264	34.9029	38.8516	42.5479	38.3429	35.3861
XLOC_040691	SIT1	chr9:35649296-35650947	-0.981601	3.25184e-06	0.00018291	UP	-0.672136	0.00278326	0.0355858	UP	4.23606	4.33763	3.16071	3.02451	1.54548	1.77785	1.95526	2.13134	2.3665	2.43657	2.30804	2.07889
XLOC_040692	RMRP	chr9:35657747-35658015	0.896546	0.000331893	0.00732726	DOWN	1.24056	1.90316e-06	0.000115846	DOWN	10.8817	6.50844	9.49834	5.60241	7.37745	14.4618	12.6438	24.7734	20.0679	15.9191	17.0483	23.1434
XLOC_040712	TOMM5	chr9:37588411-37592636	-0.545245	0.000182561	0.00462766	UP	-0.531713	0.000330969	0.00731464	UP	75.0138	79.1002	55.2556	55.7051	41.0042	42.4623	48.1505	49.4078	47.2561	50.8464	42.3148	42.3935
XLOC_040715	SHB	chr9:37912365-38070257	-0.918853	6.06191e-07	4.36573e-05	UP	-0.651991	0.000741404	0.0134657	UP	2.14836	2.12722	1.6657	1.62918	0.86701	0.937233	1.07965	1.09664	1.17739	1.27949	1.20615	1.12605
XLOC_040752	PTAR1	chr9:72324267-72376023	-0.469074	0.000995401	0.0167378	UP	-0.489322	0.000456718	0.00934452	UP	14.8142	15.8811	14.8951	15.5566	10.5643	10.6742	11.1072	12.1946	9.78124	10.9308	12.3131	10.9632
XLOC_040787	C9orf64	chr9:86553226-86571663	-0.716578	6.03951e-06	0.000306467	UP	-2.66394	0	0	UP	7.54784	7.80441	6.39353	5.87675	3.62653	3.81094	4.51137	4.7818	1.01077	1.21458	0.99863	1.13853
XLOC_040795	GOLM1	chr9:88556011-88715189	-0.72234	7.25918e-06	0.000355528	UP	-0.437931	0.00393605	0.0455036	UP	71.3047	74.8134	60.8324	57.2403	35.4085	37.7049	42.0518	42.6609	48.1599	52.9061	49.0827	44.2309
XLOC_040808	FAM75C2	chr9:90744080-90749900	-0.924255	0.0010519	0.0174613	UP	-0.983405	0.00257326	0.0336104	UP	0.462741	0.395248	0.426823	0.334981	0.22327	0.200868	0.229319	0.191401	0.192585	0.244124	0.206684	0.166828
XLOC_040848	PTCH1	chr9:98205263-98279247	-1.24103	2.22045e-16	1.09656e-13	UP	-0.516236	0.000381971	0.00816767	UP	10.3231	11.1434	8.83517	9.43582	3.80032	4.14334	4.50002	4.40998	6.37371	7.02622	7.59985	6.80443
XLOC_040868	CORO2A	chr9:100883096-100955509	-0.430421	0.00284677	0.0361393	UP	-0.461548	0.00145143	0.0221645	UP	7.77835	8.34754	6.82024	6.43772	4.77054	4.9255	5.53618	6.38917	5.03641	5.6378	5.46324	5.11219
XLOC_040870	GABBR2	chr9:101050363-101471479	-0.922529	3.98482e-05	0.00140523	UP	-0.693977	0.00424232	0.0479979	UP	0.561609	0.59501	0.40696	0.484336	0.236321	0.267219	0.276865	0.294057	0.307596	0.307386	0.333276	0.312675
XLOC_040889	ABCA1	chr9:107542885-107701693	-1.31574	0	0	UP	-0.979283	1.56408e-12	4.42382e-10	UP	8.13729	8.63486	7.82007	8.13061	3.12987	3.3404	3.52453	3.15768	3.87587	4.36487	4.26444	4.13212
XLOC_040898	EPB41L4B	chr9:111934253-112083021	-0.492985	0.000708476	0.0129744	UP	-0.422727	0.00439955	0.0492551	UP	9.32623	10.1765	7.04938	7.73702	5.50733	5.63543	6.25201	7.14881	6.16581	7.18564	6.42957	5.92438
XLOC_040901	TXN	chr9:113006091-113018920	-0.564639	3.28758e-05	0.00120742	UP	-0.431578	0.00126808	0.0201162	UP	134.295	144.183	101.789	106.965	71.7336	79.0383	83.3632	97.4504	87.7187	99.0479	88.9325	86.4147
XLOC_040915	ZNF883	chr9:115759399-115774472	-0.432578	0.00409523	0.046806	UP	-0.559614	0.000396533	0.00842058	UP	8.66671	10.0452	8.18852	9.07805	6.47936	6.31376	6.78724	7.20107	5.36826	6.4437	6.1917	6.51612
XLOC_040932	TNC	chr9:117781853-117881102	-1.18854	1.9762e-14	7.1911e-12	UP	-1.19933	9.83658e-14	3.22025e-11	UP	5.23305	6.04431	6.10236	5.77272	2.85263	2.26741	2.52108	2.57178	2.41219	2.44991	2.52313	2.70066
XLOC_040948	STOM	chr9:124101352-124132545	-0.779672	3.11332e-08	3.36766e-06	UP	-0.600351	1.95013e-05	0.000794668	UP	18.4425	19.6091	17.8542	15.1601	7.94316	9.65696	11.7858	12.6441	10.3634	12.4451	13.2177	11.3004
XLOC_040975	HSPA5	chr9:127997126-128003666	-0.676771	5.80796e-05	0.00191291	UP	-0.599077	9.72199e-05	0.00287351	UP	236.324	281.336	231.073	259.225	153.73	147.045	164.59	164.009	154.306	181.919	163.017	169.099
XLOC_041042	MED22	chr9:136207754-136214972	-0.632595	6.09554e-05	0.00198868	UP	-0.439416	0.00432716	0.0486955	UP	22.3169	21.8206	18.1305	18.5272	12.3264	12.05	13.9485	13.4662	15.0406	15.1033	14.3432	14.7457
XLOC_041049	VAV2	chr9:136627015-136861284	-0.47578	0.00115197	0.018645	UP	-0.475525	0.00114386	0.0185853	UP	14.5667	14.2678	11.8	11.9533	8.93072	8.9171	9.76589	9.79664	9.28628	9.79842	9.41329	9.08408
XLOC_042046	CLCN4	chrX:10124984-10205699	-0.516855	0.000533202	0.0105353	UP	-0.464068	0.00261968	0.0340292	UP	3.34368	3.7011	3.30187	2.98367	2.14922	2.21195	2.44206	2.54085	2.21741	2.612	2.57389	2.28295
XLOC_042089	PRDX4	chrX:23685644-23704514	-0.784142	7.67937e-09	9.68277e-07	UP	-0.629084	2.71343e-06	0.000157208	UP	123.399	130.584	101.623	99.5912	56.3796	59.5893	69.5899	77.0255	71.3642	80.7177	74.6435	67.5227
XLOC_042162	EBP,PORCN	chrX:48366170-48395543	-0.613396	4.07271e-05	0.00143055	UP	-0.466028	0.00161932	0.0240424	UP	71.2081	75.6203	60.0422	62.446	41.5891	40.8979	46.6667	46.2089	46.2493	53.4244	48.9378	45.8586
XLOC_042256	FOXO4	chrX:70315998-70323384	-1.12299	3.04667e-12	8.10161e-10	UP	-0.671342	4.1679e-05	0.00145598	UP	7.18325	7.43259	4.74921	5.29121	2.49686	2.68225	3.04715	3.00292	3.81955	4.19882	3.93465	3.46022
XLOC_042275	TSIX	chrX:73011783-73073705	-0.649136	7.22662e-06	0.00035465	UP	-0.798336	8.99941e-05	0.00270328	UP	8.59234	9.25964	7.18931	8.94339	5.31124	5.07028	5.4178	5.95904	4.65777	5.09868	5.0184	4.8992
XLOC_042350	NRK	chrX:105065803-105202664	-0.824102	9.91662e-05	0.00292358	UP	-0.855046	0.000166357	0.00434299	UP	0.947412	1.08696	0.583805	0.938269	0.443879	0.520066	0.470703	0.573082	0.443243	0.566581	0.485908	0.474984
XLOC_042353	RNF128	chrX:105937067-106040246	-1.18139	4.59561e-06	0.000243474	UP	-0.988198	0.00048201	0.00973003	UP	0.660389	0.814417	0.517591	0.693799	0.243255	0.288708	0.29666	0.369305	0.290518	0.353683	0.399166	0.320141
XLOC_042368	TDGF1P3	chrX:109763539-109766249	-0.835319	2.02838e-08	2.27436e-06	UP	-1.21268	2.84217e-14	9.99168e-12	UP	10.8901	12.4216	7.92225	9.64899	4.96975	5.37289	6.25308	6.51236	4.26365	5.0314	4.33566	4.09054
XLOC_042396	PGRMC1	chrX:118370210-118378429	-0.611128	1.71871e-05	0.000716145	UP	-0.389943	0.00397591	0.0458375	UP	165.43	177.631	132.109	128.458	86.5952	94.5648	103.748	111.795	111.725	125.626	120.463	104.677
XLOC_042422	UTP14A	chrX:129040096-129063745	-0.643312	3.32807e-05	0.00121852	UP	-0.589878	0.000195614	0.00487073	UP	13.4073	13.9471	10.3841	11.0525	7.35276	7.06002	7.86373	8.21863	8.56841	8.69509	7.42982	7.83807
XLOC_042442	CXorf69	chrX:134124967-134126503	-0.988201	8.36298e-06	0.000399219	UP	-0.819304	0.000703456	0.0129122	UP	2.09766	2.52263	1.97962	2.43227	1.22753	1.04577	1.00818	1.28687	1.15741	1.50575	1.26044	1.20473
XLOC_042462	ZIC3	chrX:136646312-136661384	-0.785789	4.07117e-07	3.08183e-05	UP	-0.477496	0.00159957	0.0238258	UP	26.9817	27.34	25.4722	23.5117	14.2262	14.3738	15.6175	16.19	17.1248	19.1891	19.9612	18.3808
XLOC_042497	GPR50	chrX:150343579-150351734	0.873252	0.00164838	0.0243822	DOWN	1.12466	9.18628e-05	0.00275243	DOWN	0.622412	0.707325	0.597237	0.621002	1.19399	1.15324	1.18782	1.14994	1.25345	1.50983	1.4464	1.35523
XLOC_042529	EMD	chrX:153604473-153615848	-0.853636	6.98002e-09	8.91648e-07	UP	-0.5514	0.000184462	0.00466872	UP	42.4352	44.4349	32.9038	34.4882	18.6486	19.752	23.4868	23.5265	26.0248	27.8013	26.8578	24.4108
XLOC_042539	DKC1	chrX:153991030-154005964	-0.585652	1.78826e-05	0.000738867	UP	-0.514801	0.00010838	0.00313088	UP	57.7329	58.0065	41.9831	45.084	30.765	31.6292	34.3002	36.817	36.8873	38.5277	33.075	33.5655
XLOC_042557	SLC25A6	chrX:1505044-1511039	-0.4831	0.000551797	0.0107947	UP	-0.417662	0.00180989	0.0261374	UP	187.801	178.347	144.825	136.045	105.053	108.712	121.091	125.069	122.818	125.408	118.596	114.049
XLOC_042558	ASMTL	chrX:1519423-1572655	-0.837324	1.18001e-07	1.05496e-05	UP	-0.668616	3.11478e-05	0.0011604	UP	15.4727	14.893	13.4552	11.9447	7.05064	7.28018	7.88879	8.47299	8.26843	9.16826	8.79526	8.40541
XLOC_042582	TLR8-AS1	chrX:12920935-12963242	-0.854875	8.86963e-08	8.24975e-06	UP	-1.11052	2.56484e-12	6.97686e-10	UP	54.518	56.9426	44.0954	51.3505	27.1197	25.535	29.2776	32.4718	22.8211	24.2791	25.11	23.6283
XLOC_042676	SLC38A5	chrX:48316926-48328644	-0.951434	2.80806e-11	6.14707e-09	UP	-0.850603	4.63079e-09	6.22688e-07	UP	27.5158	29.432	22.2673	25.8658	13.1725	12.7433	14.4957	13.7956	14.4153	16.1712	13.5922	13.858
XLOC_042749	SLC7A3	chrX:70145429-70150975	-1.30432	0	0	UP	-0.877741	2.92766e-10	5.2012e-08	UP	122.21	150.393	96.3745	137.627	48.057	49.5107	55.5388	51.9057	61.5959	78.6722	68.7631	66.778
XLOC_042800	ITM2A	chrX:78615880-78623049	-0.830835	1.13415e-06	7.55185e-05	UP	-0.675784	0.00017831	0.00454909	UP	7.56508	9.02666	6.34112	7.45615	3.83077	4.07944	4.35934	4.87831	4.15874	5.57198	4.82596	4.60441
XLOC_042876	HTR2C	chrX:113810055-114144624	-0.605927	0.000265113	0.00617847	UP	-0.614663	7.34964e-05	0.00231764	UP	4.82794	5.87098	4.51695	5.49864	3.05714	3.27499	3.48303	3.92595	2.84896	3.68789	3.59419	3.42055
XLOC_042932	ZDHHC9	chrX:128935453-128977910	-0.615477	1.49164e-05	0.000639409	UP	-0.484018	0.00077662	0.0139375	UP	12.1303	12.6425	10.2898	9.9539	6.78427	6.92939	7.79918	7.92881	8.00007	8.52418	8.27305	7.5172
XLOC_042947	HS6ST2	chrX:131760037-132097149	-1.13505	7.80371e-11	1.54521e-08	UP	-0.686723	0.000149167	0.00401546	UP	4.42986	4.49749	4.54666	3.50634	1.80944	1.90325	2.04836	2.00115	2.50493	2.91752	2.76704	2.38822
XLOC_042950	GPC4	chrX:132435063-132555563	-1.01144	1.39351e-11	3.25901e-09	UP	-0.609057	1.72317e-05	0.000717334	UP	120.608	146.908	112.827	127.354	57.2571	59.5898	68.1679	66.8787	73.9373	92.1026	87.6427	80.3397
XLOC_042951	GPC3	chrX:132669762-133119673	-1.03774	4.66294e-14	1.59204e-11	UP	-0.405956	0.00229166	0.0308502	UP	78.5836	91.516	82.7828	80.3489	37.625	39.623	43.1248	41.6537	57.4359	67.3576	63.4007	63.639
XLOC_042987	SOX3	chrX:139585151-139587225	-1.89386	0	0	UP	-0.934125	8.96744e-08	8.31276e-06	UP	9.02204	9.53991	4.83008	7.1521	1.86315	2.01	2.20759	2.18532	4.10794	4.48108	3.56053	3.74548
XLOC_043044	BCAP31	chrX:152965946-152990201	-0.62343	2.53536e-05	0.000982477	UP	-0.478043	0.00107427	0.0177617	UP	87.5405	98.3913	76.1124	76.8639	47.8825	51.358	58.3259	60.5895	56.7063	68.0033	60.0478	57.4423
XLOC_043046	PDZD4	chrX:153067615-153099471	-0.720699	1.37054e-06	8.80099e-05	UP	-0.896311	1.01464e-09	1.60843e-07	UP	41.0969	41.8585	29.2073	35.9583	22.5289	20.2415	22.2492	23.5909	20.0679	20.993	18.0938	19.4578
XLOC_043048	L1CAM	chrX:153126967-153154295	-0.865068	1.0536e-09	1.6587e-07	UP	-0.575874	4.39821e-05	0.00152153	UP	11.8475	13.563	11.9993	13.4492	7.24078	6.53256	6.9667	7.08747	7.55645	9.0695	8.36881	8.90631
XLOC_043057	LAGE3	chrX:153705240-153707596	-0.659161	7.48667e-05	0.00235191	UP	-0.511151	0.00350179	0.0418683	UP	7.82276	7.96054	5.78736	6.14337	4.07709	4.14767	4.57093	4.85309	4.72376	5.36548	4.83493	4.55739
XLOC_043065	MPP1	chrX:154006958-154033802	-0.65503	0.00241047	0.0320441	UP	-0.904891	0.000191862	0.00480029	UP	2.74548	3.01033	2.03591	2.22888	1.4382	1.33942	1.60595	1.92228	1.35933	1.38619	1.34152	1.2542
XLOC_043921	ZFY	chrY:2796374-2850832	-0.738829	8.53279e-05	0.00259506	UP	-8.9367	0	0	UP	2.64158	2.7251	2.31363	2.26179	1.42898	1.45679	1.53793	1.59194	0.00765863	0.00546513	0.00243388	0.0043495
XLOC_043939	DDX3Y	chrY:15016018-15033593	-0.473888	0.000860259	0.0150194	UP	-12.8463	0	0	UP	25.2142	26.967	21.849	23.2828	16.8404	16.9066	17.51	19.231	0.00268725	0.00114927	0.00608991	0.00339935
XLOC_043950	EIF1AY	chrY:22737610-22755040	-0.68353	2.25091e-05	0.00089183	UP	-13.4045	4.74876e-05	0.00162267	UP	12.724	13.2902	9.94603	9.68962	6.59598	7.07614	7.03367	7.93158	0	0	0.0037898	0
XLOC_043975	SLC25A6	chrY:1455044-1461039	-0.483849	0.000539993	0.0106113	UP	-0.41822	0.00178332	0.0258349	UP	187.478	178.092	144.596	135.836	104.865	108.482	120.875	124.741	122.582	125.228	118.314	113.804
XLOC_043976	ASMTL	chrY:1469423-1522655	-0.837444	9.02264e-08	8.336e-06	UP	-0.668887	2.80102e-05	0.00106308	UP	15.4618	14.8725	13.4318	11.9362	7.04206	7.27	7.88216	8.46053	8.26669	9.15353	8.78609	8.3857
XLOC_044012	BCORP1	chrY:21617316-21665180	-3.88669	1.28462e-05	0.000566313	UP	-6.81517	0.00114397	0.0185853	UP	0.170133	0.200754	0.205755	0.192114	0.0151023	0.0110688	0.0123624	0.0141251	0.00249279	0	0	0.00420678
